# Supplementary material
Source: HighWire-hosted journal article supplement (https://breathe.ersjournals.com/content/17/2/210012)
Supplement: inline-supplementary-material-2 [file inline-supplementary-material-2.xlsx]

## Sheet: DATA 1
			MV =	7	l/min
			f =	10	bpm
			Ti =	2	s
			Raw =	2	cmH2O·s/l
			EL =	5	cmH2O/l
			ECW =	5	cmH2O/l
			PEEP	0	cmH2O
			K1 =	1	cmH2O·s/l
			K2 =	5	cmH2O·(s/l)2
t	V'	V	Palv	Pao
s	l/s	l	cmH2O	cmH2O
0	0.35	0	0	1.6625
0.02	0.35	0.007	0.07	1.7325
0.04	0.35	0.014	0.14	1.8025
0.06	0.35	0.021	0.21	1.8725
0.08	0.35	0.028	0.28	1.9425
0.1	0.35	0.035	0.35	2.0125
0.12	0.35	0.042	0.42	2.0825
0.14	0.35	0.049	0.49	2.1525
0.16	0.35	0.056	0.56	2.2225
0.18	0.35	0.063	0.63	2.2925
0.2	0.35	0.07	0.7	2.3625
0.22	0.35	0.077	0.77	2.4325
0.24	0.35	0.084	0.84	2.5025
0.26	0.35	0.091	0.91	2.5725
0.28	0.35	0.098	0.98	2.6425
0.3	0.35	0.105	1.05	2.7125
0.32	0.35	0.112	1.12	2.7825
0.34	0.35	0.119	1.19	2.8525
0.36	0.35	0.126	1.26	2.9225
0.38	0.35	0.133	1.33	2.9925
0.4	0.35	0.14	1.4	3.0625
0.42	0.35	0.147	1.47	3.1325
0.44	0.35	0.154	1.54	3.2025
0.46	0.35	0.161	1.61	3.2725
0.48	0.35	0.168	1.68	3.3425
0.5	0.35	0.175	1.75	3.4125
0.52	0.35	0.182	1.82	3.4825
0.54	0.35	0.189	1.89	3.5525
0.56	0.35	0.196	1.96	3.6225
0.58	0.35	0.203	2.03	3.6925
0.6	0.35	0.21	2.1	3.7625
0.62	0.35	0.217	2.17	3.8325
0.64	0.35	0.224	2.24	3.9025
0.66	0.35	0.231	2.31	3.9725
0.68	0.35	0.238	2.38	4.0425
0.7	0.35	0.245	2.45	4.1125
0.72	0.35	0.252	2.52	4.1825
0.74	0.35	0.259	2.59	4.2525
0.76	0.35	0.266	2.66	4.3225
0.78	0.35	0.273	2.73	4.3925
0.8	0.35	0.28	2.8	4.4625
0.82	0.35	0.287	2.87	4.5325
0.84	0.35	0.294	2.94	4.6025
0.86	0.35	0.301	3.01	4.6725
0.88	0.35	0.308	3.08	4.7425
0.9	0.35	0.315	3.15	4.8125
0.92	0.35	0.322	3.22	4.8825
0.94	0.35	0.329	3.29	4.9525
0.96	0.35	0.336	3.36	5.0225
0.98	0.35	0.343	3.43	5.0925
1	0.35	0.35	3.5	5.1625
1.02	0.35	0.357	3.57	5.2325
1.04	0.35	0.364	3.64	5.3025
1.06	0.35	0.371	3.71	5.3725
1.08	0.35	0.378	3.78	5.4425
1.1	0.35	0.385	3.85	5.5125
1.12	0.35	0.392	3.92	5.5825
1.14	0.35	0.399	3.99	5.6525
1.16	0.35	0.406	4.06	5.7225
1.18	0.35	0.413	4.13	5.7925
1.2	0.35	0.42	4.2	5.8625
1.22	0.35	0.427	4.27	5.9325
1.24	0.35	0.434	4.34	6.0025
1.26	0.35	0.441	4.41	6.0725
1.28	0.35	0.448	4.48	6.1425
1.3	0.35	0.455	4.55	6.2125
1.32	0.35	0.462	4.62	6.2825
1.34	0.35	0.469	4.69	6.3525
1.36	0.35	0.476	4.76	6.4225
1.38	0.35	0.483	4.83	6.4925
1.4	0.35	0.49	4.9	6.5625
1.42	0.35	0.497	4.97	6.6325
1.44	0.35	0.504	5.04	6.7025
1.46	0.35	0.511	5.11	6.7725
1.48	0.35	0.518	5.18	6.8425
1.5	0.35	0.525	5.25	6.9125
1.52	0.35	0.532	5.32	6.9825
1.54	0.35	0.539	5.39	7.0525
1.56	0.35	0.546	5.46	7.1225
1.58	0.35	0.553	5.53	7.1925
1.6	0.35	0.56	5.6	7.2625
1.62	0.35	0.567	5.67	7.3325
1.64	0.35	0.574	5.74	7.4025
1.66	0.35	0.581	5.81	7.4725
1.68	0.35	0.588	5.88	7.5425
1.7	0.35	0.595	5.95	7.6125
1.72	0.35	0.602	6.02	7.6825
1.74	0.35	0.609	6.09	7.7525
1.76	0.35	0.616	6.16	7.8225
1.78	0.35	0.623	6.23	7.8925
1.8	0.35	0.63	6.3	7.9625
1.82	0.35	0.637	6.37	8.0325
1.84	0.35	0.644	6.44	8.1025
1.86	0.35	0.651	6.51	8.1725
1.88	0.35	0.658	6.58	8.2425
1.9	0.35	0.665	6.65	8.3125
1.92	0.35	0.672	6.72	8.3825
1.94	0.35	0.679	6.79	8.4525
1.96	0.35	0.686	6.86	8.5225
1.98	0.35	0.693	6.93	8.5925
2	0.35	0.7	7	8.6625
2.02	-0.920652	0.681587	6.81587	0
2.04	-0.905474	0.663477	6.63477	0
2.06	-0.890356	0.64567	6.4567	0
2.08	-0.875302	0.628164	6.28164	0
2.1	-0.860311	0.610958	6.10958	0
2.12	-0.845386	0.59405	5.9405	0
2.14	-0.830528	0.57744	5.7744	0
2.16	-0.815739	0.561125	5.61125	0
2.18	-0.80102	0.545105	5.45105	0
2.2	-0.786372	0.529377	5.29377	0
2.22	-0.771797	0.513941	5.13941	0
2.24	-0.757297	0.498795	4.98795	0
2.26	-0.742874	0.483938	4.83938	0
2.28	-0.728528	0.469367	4.69367	0
2.3	-0.714263	0.455082	4.55082	0
2.32	-0.70008	0.44108	4.4108	0
2.34	-0.68598	0.427361	4.27361	0
2.36	-0.671966	0.413921	4.13921	0
2.38	-0.658039	0.400761	4.00761	0
2.4	-0.644202	0.387877	3.87877	0
2.42	-0.630457	0.375268	3.75268	0
2.44	-0.616805	0.362931	3.62931	0
2.46	-0.603249	0.350866	3.50866	0
2.48	-0.589792	0.339071	3.39071	0
2.5	-0.576435	0.327542	3.27542	0
2.52	-0.563181	0.316278	3.16278	0
2.54	-0.550032	0.305278	3.05278	0
2.56	-0.53699	0.294538	2.94538	0
2.58	-0.524059	0.284057	2.84057	0
2.6	-0.51124	0.273832	2.73832	0
2.62	-0.498537	0.263861	2.63861	0
2.64	-0.485952	0.254142	2.54142	0
2.66	-0.473487	0.244672	2.44672	0
2.68	-0.461146	0.235449	2.35449	0
2.7	-0.448931	0.226471	2.26471	0
2.72	-0.436845	0.217734	2.17734	0
2.74	-0.42489	0.209236	2.09236	0
2.76	-0.413071	0.200975	2.00975	0
2.78	-0.40139	0.192947	1.92947	0
2.8	-0.38985	0.18515	1.8515	0
2.82	-0.378453	0.177581	1.77581	0
2.84	-0.367203	0.170237	1.70237	0
2.86	-0.356104	0.163115	1.63115	0
2.88	-0.345158	0.156212	1.56212	0
2.9	-0.334367	0.149524	1.49524	0
2.92	-0.323737	0.143049	1.43049	0
2.94	-0.313268	0.136784	1.36784	0
2.96	-0.302965	0.130725	1.30725	0
2.98	-0.292831	0.124868	1.24868	0
3	-0.282868	0.119211	1.19211	0
3.02	-0.27308	0.113749	1.13749	0
3.04	-0.263469	0.10848	1.0848	0
3.06	-0.254039	0.103399	1.03399	0
3.08	-0.244791	0.0985032	0.985032	0
3.1	-0.235729	0.0937886	0.937886	0
3.12	-0.226856	0.0892515	0.892515	0
3.14	-0.218172	0.0848881	0.848881	0
3.16	-0.209682	0.0806944	0.806944	0
3.18	-0.201387	0.0766667	0.766667	0
3.2	-0.193288	0.0728009	0.728009	0
3.22	-0.185388	0.0690932	0.690932	0
3.24	-0.177688	0.0655394	0.655394	0
3.26	-0.17019	0.0621356	0.621356	0
3.28	-0.162894	0.0588777	0.588777	0
3.3	-0.155802	0.0557617	0.557617	0
3.32	-0.148913	0.0527834	0.527834	0
3.34	-0.142229	0.0499388	0.499388	0
3.36	-0.135749	0.0472238	0.472238	0
3.38	-0.129474	0.0446344	0.446344	0
3.4	-0.123401	0.0421664	0.421664	0
3.42	-0.117532	0.0398157	0.398157	0
3.44	-0.111863	0.0375785	0.375785	0
3.46	-0.106395	0.0354506	0.354506	0
3.48	-0.101125	0.0334281	0.334281	0
3.5	-0.0960506	0.0315071	0.315071	0
3.52	-0.0911701	0.0296837	0.296837	0
3.54	-0.0864806	0.027954	0.27954	0
3.56	-0.0819791	0.0263145	0.263145	0
3.58	-0.0776624	0.0247612	0.247612	0
3.6	-0.0735269	0.0232907	0.232907	0
3.62	-0.0695691	0.0218993	0.218993	0
3.64	-0.0657848	0.0205836	0.205836	0
3.66	-0.0621701	0.0193402	0.193402	0
3.68	-0.0587204	0.0181658	0.181658	0
3.7	-0.0554315	0.0170572	0.170572	0
3.72	-0.0522986	0.0160112	0.160112	0
3.74	-0.049317	0.0150248	0.150248	0
3.76	-0.0464818	0.0140952	0.140952	0
3.78	-0.0437883	0.0132194	0.132194	0
3.8	-0.0412314	0.0123948	0.123948	0
3.82	-0.0388062	0.0116187	0.116187	0
3.84	-0.0365076	0.0108885	0.108885	0
3.86	-0.0343308	0.0102019	0.102019	0
3.88	-0.0322707	0.00955651	0.0955651	0
3.9	-0.0303226	0.00895006	0.0895006	0
3.92	-0.0284815	0.00838043	0.0838043	0
3.94	-0.0267428	0.00784557	0.0784557	0
3.96	-0.0251017	0.00734354	0.0734354	0
3.98	-0.0235538	0.00687246	0.0687246	0
4	-0.0220946	0.00643057	0.0643057	0
4.02	-0.0207197	0.00601617	0.0601617	0
4.04	-0.019425	0.00562767	0.0562767	0
4.06	-0.0182064	0.00526354	0.0526354	0
4.08	-0.0170601	0.00492234	0.0492234	0
4.1	-0.0159821	0.0046027	0.046027	0
4.12	-0.0149689	0.00430332	0.0430332	0
4.14	-0.014017	0.00402298	0.0402298	0
4.16	-0.0131229	0.00376053	0.0376053	0
4.18	-0.0122836	0.00351485	0.0351485	0
4.2	-0.0114959	0.00328494	0.0328494	0
4.22	-0.0107569	0.0030698	0.030698	0
4.24	-0.0100639	0.00286852	0.0286852	0
4.26	-0.00941403	0.00268024	0.0268024	0
4.28	-0.00880492	0.00250414	0.0250414	0
4.3	-0.00823413	0.00233946	0.0233946	0
4.32	-0.00769939	0.00218547	0.0218547	0
4.34	-0.00719854	0.0020415	0.020415	0
4.36	-0.00672952	0.00190691	0.0190691	0
4.38	-0.00629041	0.0017811	0.017811	0
4.4	-0.00587939	0.00166351	0.0166351	0
4.42	-0.00549472	0.00155362	0.0155362	0
4.44	-0.00513479	0.00145092	0.0145092	0
4.46	-0.00479804	0.00135496	0.0135496	0
4.48	-0.00448304	0.0012653	0.012653	0
4.5	-0.00418843	0.00118153	0.0118153	0
4.52	-0.00391292	0.00110327	0.0110327	0
4.54	-0.00365531	0.00103017	0.0103017	0
4.56	-0.00341446	0.000961879	0.00961879	0
4.58	-0.00318931	0.000898093	0.00898093	0
4.6	-0.00297885	0.000838515	0.00838515	0
4.62	-0.00278215	0.000782872	0.00782872	0
4.64	-0.00259832	0.000730906	0.00730906	0
4.66	-0.00242654	0.000682375	0.00682375	0
4.68	-0.00226603	0.000637055	0.00637055	0
4.7	-0.00211605	0.000594734	0.00594734	0
4.72	-0.00197594	0.000555215	0.00555215	0
4.74	-0.00184504	0.000518314	0.00518314	0
4.76	-0.00172277	0.000483859	0.00483859	0
4.78	-0.00160855	0.000451688	0.00451688	0
4.8	-0.00150187	0.00042165	0.0042165	0
4.82	-0.00140222	0.000393606	0.00393606	0
4.84	-0.00130916	0.000367423	0.00367423	0
4.86	-0.00122225	0.000342978	0.00342978	0
4.88	-0.00114109	0.000320156	0.00320156	0
4.9	-0.00106529	0.00029885	0.0029885	0
4.92	-0.000994518	0.00027896	0.0027896	0
4.94	-0.000928429	0.000260391	0.00260391	0
4.96	-0.000866718	0.000243057	0.00243057	0
4.98	-0.000809098	0.000226875	0.00226875	0
5	-0.000755298	0.000211769	0.00211769	0
5.02	-0.000705067	0.000197667	0.00197667	0
5.04	-0.000658169	0.000184504	0.00184504	0
5.06	-0.000614384	0.000172216	0.00172216	0
5.08	-0.000573506	0.000160746	0.00160746	0
5.1	-0.000535343	0.000150039	0.00150039	0
5.12	-0.000499715	0.000140045	0.00140045	0
5.14	-0.000466454	0.000130716	0.00130716	0
5.16	-0.000435404	0.000122008	0.00122008	0
5.18	-0.000406418	0.00011388	0.0011388	0
5.2	-0.000379359	0.000106292	0.00106292	0
5.22	-0.000354099	9.92104e-05	0.000992104	0
5.24	-0.000330519	9.26e-05	0.000926	0
5.26	-0.000308508	8.64298e-05	0.000864298	0
5.28	-0.000287961	8.06706e-05	0.000806706	0
5.3	-0.000268782	7.5295e-05	0.00075295	0
5.32	-0.000250878	7.02774e-05	0.000702774	0
5.34	-0.000234167	6.55941e-05	0.000655941	0
5.36	-0.000218567	6.12227e-05	0.000612227	0
5.38	-0.000204006	5.71426e-05	0.000571426	0
5.4	-0.000190415	5.33343e-05	0.000533343	0
5.42	-0.000177728	4.97797e-05	0.000497797	0
5.44	-0.000165887	4.6462e-05	0.00046462	0
5.46	-0.000154833	4.33653e-05	0.000433653	0
5.48	-0.000144516	4.0475e-05	0.00040475	0
5.5	-0.000134886	3.77773e-05	0.000377773	0
5.52	-0.000125898	3.52593e-05	0.000352593	0
5.54	-0.000117508	3.29092e-05	0.000329092	0
5.56	-0.000109677	3.07156e-05	0.000307156	0
5.58	-0.000102368	2.86683e-05	0.000286683	0
5.6	-9.55456e-05	2.67573e-05	0.000267573	0
5.62	-8.91779e-05	2.49738e-05	0.000249738	0
5.64	-8.32344e-05	2.33091e-05	0.000233091	0
5.66	-7.76869e-05	2.17554e-05	0.000217554	0
5.68	-7.25091e-05	2.03052e-05	0.000203052	0
5.7	-6.76763e-05	1.89517e-05	0.000189517	0
5.72	-6.31655e-05	1.76883e-05	0.000176883	0
5.74	-5.89553e-05	1.65092e-05	0.000165092	0
5.76	-5.50257e-05	1.54087e-05	0.000154087	0
5.78	-5.1358e-05	1.43816e-05	0.000143816	0
5.8	-4.79347e-05	1.34229e-05	0.000134229	0
5.82	-4.47396e-05	1.25281e-05	0.000125281	0
5.84	-4.17573e-05	1.16929e-05	0.000116929	0
5.86	-3.89739e-05	1.09135e-05	0.000109135	0
5.88	-3.6376e-05	1.01859e-05	0.000101859	0
5.9	-3.39512e-05	9.50691e-06	9.50691e-05	0
5.92	-3.1688e-05	8.87315e-06	8.87315e-05	0
5.94	-2.95757e-05	8.28163e-06	8.28163e-05	0
5.96	-2.76042e-05	7.72955e-06	7.72955e-05	0
5.98	-2.57641e-05	7.21427e-06	7.21427e-05	0
6	-2.40466e-05	6.73334e-06	6.73334e-05	0
6.02	0.35	0.00700673	0.0700673	1.73257
6.04	0.35	0.0140067	0.140067	1.80257
6.06	0.35	0.0210067	0.210067	1.87257
6.08	0.35	0.0280067	0.280067	1.94257
6.1	0.35	0.0350067	0.350067	2.01257
6.12	0.35	0.0420067	0.420067	2.08257
6.14	0.35	0.0490067	0.490067	2.15257
6.16	0.35	0.0560067	0.560067	2.22257
6.18	0.35	0.0630067	0.630067	2.29257
6.2	0.35	0.0700067	0.700067	2.36257
6.22	0.35	0.0770067	0.770067	2.43257
6.24	0.35	0.0840067	0.840067	2.50257
6.26	0.35	0.0910067	0.910067	2.57257
6.28	0.35	0.0980067	0.980067	2.64257
6.3	0.35	0.105007	1.05007	2.71257
6.32	0.35	0.112007	1.12007	2.78257
6.34	0.35	0.119007	1.19007	2.85257
6.36	0.35	0.126007	1.26007	2.92257
6.38	0.35	0.133007	1.33007	2.99257
6.4	0.35	0.140007	1.40007	3.06257
6.42	0.35	0.147007	1.47007	3.13257
6.44	0.35	0.154007	1.54007	3.20257
6.46	0.35	0.161007	1.61007	3.27257
6.48	0.35	0.168007	1.68007	3.34257
6.5	0.35	0.175007	1.75007	3.41257
6.52	0.35	0.182007	1.82007	3.48257
6.54	0.35	0.189007	1.89007	3.55257
6.56	0.35	0.196007	1.96007	3.62257
6.58	0.35	0.203007	2.03007	3.69257
6.6	0.35	0.210007	2.10007	3.76257
6.62	0.35	0.217007	2.17007	3.83257
6.64	0.35	0.224007	2.24007	3.90257
6.66	0.35	0.231007	2.31007	3.97257
6.68	0.35	0.238007	2.38007	4.04257
6.7	0.35	0.245007	2.45007	4.11257
6.72	0.35	0.252007	2.52007	4.18257
6.74	0.35	0.259007	2.59007	4.25257
6.76	0.35	0.266007	2.66007	4.32257
6.78	0.35	0.273007	2.73007	4.39257
6.8	0.35	0.280007	2.80007	4.46257
6.82	0.35	0.287007	2.87007	4.53257
6.84	0.35	0.294007	2.94007	4.60257
6.86	0.35	0.301007	3.01007	4.67257
6.88	0.35	0.308007	3.08007	4.74257
6.9	0.35	0.315007	3.15007	4.81257
6.92	0.35	0.322007	3.22007	4.88257
6.94	0.35	0.329007	3.29007	4.95257
6.96	0.35	0.336007	3.36007	5.02257
6.98	0.35	0.343007	3.43007	5.09257
7	0.35	0.350007	3.50007	5.16257
7.02	0.35	0.357007	3.57007	5.23257
7.04	0.35	0.364007	3.64007	5.30257
7.06	0.35	0.371007	3.71007	5.37257
7.08	0.35	0.378007	3.78007	5.44257
7.1	0.35	0.385007	3.85007	5.51257
7.12	0.35	0.392007	3.92007	5.58257
7.14	0.35	0.399007	3.99007	5.65257
7.16	0.35	0.406007	4.06007	5.72257
7.18	0.35	0.413007	4.13007	5.79257
7.2	0.35	0.420007	4.20007	5.86257
7.22	0.35	0.427007	4.27007	5.93257
7.24	0.35	0.434007	4.34007	6.00257
7.26	0.35	0.441007	4.41007	6.07257
7.28	0.35	0.448007	4.48007	6.14257
7.3	0.35	0.455007	4.55007	6.21257
7.32	0.35	0.462007	4.62007	6.28257
7.34	0.35	0.469007	4.69007	6.35257
7.36	0.35	0.476007	4.76007	6.42257
7.38	0.35	0.483007	4.83007	6.49257
7.4	0.35	0.490007	4.90007	6.56257
7.42	0.35	0.497007	4.97007	6.63257
7.44	0.35	0.504007	5.04007	6.70257
7.46	0.35	0.511007	5.11007	6.77257
7.48	0.35	0.518007	5.18007	6.84257
7.5	0.35	0.525007	5.25007	6.91257
7.52	0.35	0.532007	5.32007	6.98257
7.54	0.35	0.539007	5.39007	7.05257
7.56	0.35	0.546007	5.46007	7.12257
7.58	0.35	0.553007	5.53007	7.19257
7.6	0.35	0.560007	5.60007	7.26257
7.62	0.35	0.567007	5.67007	7.33257
7.64	0.35	0.574007	5.74007	7.40257
7.66	0.35	0.581007	5.81007	7.47257
7.68	0.35	0.588007	5.88007	7.54257
7.7	0.35	0.595007	5.95007	7.61257
7.72	0.35	0.602007	6.02007	7.68257
7.74	0.35	0.609007	6.09007	7.75257
7.76	0.35	0.616007	6.16007	7.82257
7.78	0.35	0.623007	6.23007	7.89257
7.8	0.35	0.630007	6.30007	7.96257
7.82	0.35	0.637007	6.37007	8.03257
7.84	0.35	0.644007	6.44007	8.10257
7.86	0.35	0.651007	6.51007	8.17257
7.88	0.35	0.658007	6.58007	8.24257
7.9	0.35	0.665007	6.65007	8.31257
7.92	0.35	0.672007	6.72007	8.38257
7.94	0.35	0.679007	6.79007	8.45257
7.96	0.35	0.686007	6.86007	8.52257
7.98	0.35	0.693007	6.93007	8.59257
8	0.35	0.700007	7.00007	8.66257

## Sheet: FIG 1
								VM =	7	l/min
								f =	10	bpm
								Ti =	2	s
								Raw =	2	cmH2O·s/l
								EL =	5	cmH2O/l
								ECW =	5	cmH2O/l
								PEEP =	0	cmH2O
								K1 =	1	cmH2O·s/l
								K2 =	5	cmH2O·(s/l)2

## Sheet: DATA 2
			MV =	7	l/min
			f =	10	bpm
			Ti =	2	s
			Raw =	5	cmH2O·s/l
			EL =	5	cmH2O/l
			ECW =	5	cmH2O/l
			PEEP =	0	cmH2O
			K1 =	1	cmH2O·s/l
			K2 =	5	cmH2O·(s/l)2
t	V'	V	Palv	Pao
s	l/s	l	cmH2O	cmH2O
0	0.35	0	0	2.7125
0.02	0.35	0.007	0.07	2.7825
0.04	0.35	0.014	0.14	2.8525
0.06	0.35	0.021	0.21	2.9225
0.08	0.35	0.028	0.28	2.9925
0.1	0.35	0.035	0.35	3.0625
0.12	0.35	0.042	0.42	3.1325
0.14	0.35	0.049	0.49	3.2025
0.16	0.35	0.056	0.56	3.2725
0.18	0.35	0.063	0.63	3.3425
0.2	0.35	0.07	0.7	3.4125
0.22	0.35	0.077	0.77	3.4825
0.24	0.35	0.084	0.84	3.5525
0.26	0.35	0.091	0.91	3.6225
0.28	0.35	0.098	0.98	3.6925
0.3	0.35	0.105	1.05	3.7625
0.32	0.35	0.112	1.12	3.8325
0.34	0.35	0.119	1.19	3.9025
0.36	0.35	0.126	1.26	3.9725
0.38	0.35	0.133	1.33	4.0425
0.4	0.35	0.14	1.4	4.1125
0.42	0.35	0.147	1.47	4.1825
0.44	0.35	0.154	1.54	4.2525
0.46	0.35	0.161	1.61	4.3225
0.48	0.35	0.168	1.68	4.3925
0.5	0.35	0.175	1.75	4.4625
0.52	0.35	0.182	1.82	4.5325
0.54	0.35	0.189	1.89	4.6025
0.56	0.35	0.196	1.96	4.6725
0.58	0.35	0.203	2.03	4.7425
0.6	0.35	0.21	2.1	4.8125
0.62	0.35	0.217	2.17	4.8825
0.64	0.35	0.224	2.24	4.9525
0.66	0.35	0.231	2.31	5.0225
0.68	0.35	0.238	2.38	5.0925
0.7	0.35	0.245	2.45	5.1625
0.72	0.35	0.252	2.52	5.2325
0.74	0.35	0.259	2.59	5.3025
0.76	0.35	0.266	2.66	5.3725
0.78	0.35	0.273	2.73	5.4425
0.8	0.35	0.28	2.8	5.5125
0.82	0.35	0.287	2.87	5.5825
0.84	0.35	0.294	2.94	5.6525
0.86	0.35	0.301	3.01	5.7225
0.88	0.35	0.308	3.08	5.7925
0.9	0.35	0.315	3.15	5.8625
0.92	0.35	0.322	3.22	5.9325
0.94	0.35	0.329	3.29	6.0025
0.96	0.35	0.336	3.36	6.0725
0.98	0.35	0.343	3.43	6.1425
1	0.35	0.35	3.5	6.2125
1.02	0.35	0.357	3.57	6.2825
1.04	0.35	0.364	3.64	6.3525
1.06	0.35	0.371	3.71	6.4225
1.08	0.35	0.378	3.78	6.4925
1.1	0.35	0.385	3.85	6.5625
1.12	0.35	0.392	3.92	6.6325
1.14	0.35	0.399	3.99	6.7025
1.16	0.35	0.406	4.06	6.7725
1.18	0.35	0.413	4.13	6.8425
1.2	0.35	0.42	4.2	6.9125
1.22	0.35	0.427	4.27	6.9825
1.24	0.35	0.434	4.34	7.0525
1.26	0.35	0.441	4.41	7.1225
1.28	0.35	0.448	4.48	7.1925
1.3	0.35	0.455	4.55	7.2625
1.32	0.35	0.462	4.62	7.3325
1.34	0.35	0.469	4.69	7.4025
1.36	0.35	0.476	4.76	7.4725
1.38	0.35	0.483	4.83	7.5425
1.4	0.35	0.49	4.9	7.6125
1.42	0.35	0.497	4.97	7.6825
1.44	0.35	0.504	5.04	7.7525
1.46	0.35	0.511	5.11	7.8225
1.48	0.35	0.518	5.18	7.8925
1.5	0.35	0.525	5.25	7.9625
1.52	0.35	0.532	5.32	8.0325
1.54	0.35	0.539	5.39	8.1025
1.56	0.35	0.546	5.46	8.1725
1.58	0.35	0.553	5.53	8.2425
1.6	0.35	0.56	5.6	8.3125
1.62	0.35	0.567	5.67	8.3825
1.64	0.35	0.574	5.74	8.4525
1.66	0.35	0.581	5.81	8.5225
1.68	0.35	0.588	5.88	8.5925
1.7	0.35	0.595	5.95	8.6625
1.72	0.35	0.602	6.02	8.7325
1.74	0.35	0.609	6.09	8.8025
1.76	0.35	0.616	6.16	8.8725
1.78	0.35	0.623	6.23	8.9425
1.8	0.35	0.63	6.3	9.0125
1.82	0.35	0.637	6.37	9.0825
1.84	0.35	0.644	6.44	9.1525
1.86	0.35	0.651	6.51	9.2225
1.88	0.35	0.658	6.58	9.2925
1.9	0.35	0.665	6.65	9.3625
1.92	0.35	0.672	6.72	9.4325
1.94	0.35	0.679	6.79	9.5025
1.96	0.35	0.686	6.86	9.5725
1.98	0.35	0.693	6.93	9.6425
2	0.35	0.7	7	9.7125
2.02	-0.726648	0.685467	6.85467	0
2.04	-0.715648	0.671154	6.71154	0
2.06	-0.704724	0.65706	6.5706	0
2.08	-0.693876	0.643182	6.43182	0
2.1	-0.683106	0.62952	6.2952	0
2.12	-0.672413	0.616072	6.16072	0
2.14	-0.6618	0.602836	6.02836	0
2.16	-0.651266	0.58981	5.8981	0
2.18	-0.640813	0.576994	5.76994	0
2.2	-0.630441	0.564385	5.64385	0
2.22	-0.62015	0.551982	5.51982	0
2.24	-0.609943	0.539783	5.39783	0
2.26	-0.599818	0.527787	5.27787	0
2.28	-0.589778	0.515992	5.15992	0
2.3	-0.579822	0.504395	5.04395	0
2.32	-0.569952	0.492996	4.92996	0
2.34	-0.560168	0.481793	4.81793	0
2.36	-0.550471	0.470783	4.70783	0
2.38	-0.540861	0.459966	4.59966	0
2.4	-0.53134	0.449339	4.49339	0
2.42	-0.521907	0.438901	4.38901	0
2.44	-0.512565	0.42865	4.2865	0
2.46	-0.503312	0.418584	4.18584	0
2.48	-0.49415	0.408701	4.08701	0
2.5	-0.48508	0.398999	3.98999	0
2.52	-0.476102	0.389477	3.89477	0
2.54	-0.467217	0.380133	3.80133	0
2.56	-0.458425	0.370964	3.70964	0
2.58	-0.449727	0.36197	3.6197	0
2.6	-0.441123	0.353147	3.53147	0
2.62	-0.432614	0.344495	3.44495	0
2.64	-0.424201	0.336011	3.36011	0
2.66	-0.415884	0.327693	3.27693	0
2.68	-0.407663	0.31954	3.1954	0
2.7	-0.399539	0.311549	3.11549	0
2.72	-0.391512	0.303719	3.03719	0
2.74	-0.383583	0.296047	2.96047	0
2.76	-0.375753	0.288532	2.88532	0
2.78	-0.36802	0.281172	2.81172	0
2.8	-0.360386	0.273964	2.73964	0
2.82	-0.352852	0.266907	2.66907	0
2.84	-0.345417	0.259999	2.59999	0
2.86	-0.338081	0.253237	2.53237	0
2.88	-0.330845	0.24662	2.4662	0
2.9	-0.323709	0.240146	2.40146	0
2.92	-0.316674	0.233812	2.33812	0
2.94	-0.309738	0.227618	2.27618	0
2.96	-0.302903	0.22156	2.2156	0
2.98	-0.296169	0.215636	2.15636	0
3	-0.289535	0.209846	2.09846	0
3.02	-0.283001	0.204185	2.04185	0
3.04	-0.276567	0.198654	1.98654	0
3.06	-0.270234	0.193249	1.93249	0
3.08	-0.264001	0.187969	1.87969	0
3.1	-0.257868	0.182812	1.82812	0
3.12	-0.251835	0.177775	1.77775	0
3.14	-0.245902	0.172857	1.72857	0
3.16	-0.240068	0.168056	1.68056	0
3.18	-0.234333	0.163369	1.63369	0
3.2	-0.228697	0.158795	1.58795	0
3.22	-0.223159	0.154332	1.54332	0
3.24	-0.217719	0.149978	1.49978	0
3.26	-0.212376	0.14573	1.4573	0
3.28	-0.207131	0.141588	1.41588	0
3.3	-0.201982	0.137548	1.37548	0
3.32	-0.196929	0.133609	1.33609	0
3.34	-0.191971	0.12977	1.2977	0
3.36	-0.187108	0.126028	1.26028	0
3.38	-0.18234	0.122381	1.22381	0
3.4	-0.177664	0.118828	1.18828	0
3.42	-0.173082	0.115366	1.15366	0
3.44	-0.168591	0.111994	1.11994	0
3.46	-0.164191	0.108711	1.08711	0
3.48	-0.159882	0.105513	1.05513	0
3.5	-0.155662	0.1024	1.024	0
3.52	-0.151531	0.099369	0.99369	0
3.54	-0.147488	0.0964192	0.964192	0
3.56	-0.143531	0.0935486	0.935486	0
3.58	-0.13966	0.0907554	0.907554	0
3.6	-0.135874	0.0880379	0.880379	0
3.62	-0.132172	0.0853945	0.853945	0
3.64	-0.128553	0.0828234	0.828234	0
3.66	-0.125015	0.0803231	0.803231	0
3.68	-0.121558	0.077892	0.77892	0
3.7	-0.118181	0.0755284	0.755284	0
3.72	-0.114882	0.0732307	0.732307	0
3.74	-0.111661	0.0709975	0.709975	0
3.76	-0.108516	0.0688272	0.688272	0
3.78	-0.105446	0.0667183	0.667183	0
3.8	-0.10245	0.0646693	0.646693	0
3.82	-0.0995273	0.0626787	0.626787	0
3.84	-0.0966759	0.0607452	0.607452	0
3.86	-0.093895	0.0588673	0.588673	0
3.88	-0.0911834	0.0570436	0.570436	0
3.9	-0.0885399	0.0552728	0.552728	0
3.92	-0.0859632	0.0535536	0.535536	0
3.94	-0.0834523	0.0518845	0.518845	0
3.96	-0.0810058	0.0502644	0.502644	0
3.98	-0.0786227	0.0486919	0.486919	0
4	-0.0763016	0.0471659	0.471659	0
4.02	-0.0740414	0.0456851	0.456851	0
4.04	-0.0718408	0.0442483	0.442483	0
4.06	-0.0696988	0.0428543	0.428543	0
4.08	-0.0676141	0.041502	0.41502	0
4.1	-0.0655854	0.0401903	0.401903	0
4.12	-0.0636118	0.0389181	0.389181	0
4.14	-0.0616918	0.0376842	0.376842	0
4.16	-0.0598245	0.0364877	0.364877	0
4.18	-0.0580087	0.0353276	0.353276	0
4.2	-0.0562432	0.0342027	0.342027	0
4.22	-0.0545268	0.0331122	0.331122	0
4.24	-0.0528586	0.032055	0.32055	0
4.26	-0.0512373	0.0310302	0.310302	0
4.28	-0.0496618	0.030037	0.30037	0
4.3	-0.0481312	0.0290744	0.290744	0
4.32	-0.0466442	0.0281415	0.281415	0
4.34	-0.0452	0.0272375	0.272375	0
4.36	-0.0437973	0.0263616	0.263616	0
4.38	-0.0424353	0.0255129	0.255129	0
4.4	-0.0411129	0.0246906	0.246906	0
4.42	-0.039829	0.023894	0.23894	0
4.44	-0.0385828	0.0231224	0.231224	0
4.46	-0.0373733	0.0223749	0.223749	0
4.48	-0.0361995	0.0216509	0.216509	0
4.5	-0.0350605	0.0209497	0.209497	0
4.52	-0.0339553	0.0202706	0.202706	0
4.54	-0.0328832	0.0196129	0.196129	0
4.56	-0.0318432	0.0189761	0.189761	0
4.58	-0.0308345	0.0183594	0.183594	0
4.6	-0.0298561	0.0177622	0.177622	0
4.62	-0.0289074	0.0171841	0.171841	0
4.64	-0.0279874	0.0166244	0.166244	0
4.66	-0.0270954	0.0160824	0.160824	0
4.68	-0.0262307	0.0155578	0.155578	0
4.7	-0.0253924	0.01505	0.1505	0
4.72	-0.0245798	0.0145584	0.145584	0
4.74	-0.0237922	0.0140825	0.140825	0
4.76	-0.023029	0.013622	0.13622	0
4.78	-0.0222893	0.0131762	0.131762	0
4.8	-0.0215725	0.0127447	0.127447	0
4.82	-0.020878	0.0123272	0.123272	0
4.84	-0.0202051	0.0119231	0.119231	0
4.86	-0.0195532	0.011532	0.11532	0
4.88	-0.0189216	0.0111536	0.111536	0
4.9	-0.0183099	0.0107874	0.107874	0
4.92	-0.0177174	0.010433	0.10433	0
4.94	-0.0171435	0.0100902	0.100902	0
4.96	-0.0165876	0.0097584	0.097584	0
4.98	-0.0160493	0.00943741	0.0943741	0
5	-0.0155281	0.00912685	0.0912685	0
5.02	-0.0150233	0.00882639	0.0882639	0
5.04	-0.0145346	0.00853569	0.0853569	0
5.06	-0.0140614	0.00825447	0.0825447	0
5.08	-0.0136032	0.0079824	0.079824	0
5.1	-0.0131597	0.00771921	0.0771921	0
5.12	-0.0127303	0.0074646	0.074646	0
5.14	-0.0123146	0.00721831	0.0721831	0
5.16	-0.0119123	0.00698006	0.0698006	0
5.18	-0.0115228	0.00674961	0.0674961	0
5.2	-0.0111458	0.00652669	0.0652669	0
5.22	-0.010781	0.00631107	0.0631107	0
5.24	-0.0104278	0.00610252	0.0610252	0
5.26	-0.0100861	0.00590079	0.0590079	0
5.28	-0.00975535	0.00570569	0.0570569	0
5.3	-0.00943529	0.00551698	0.0551698	0
5.32	-0.00912557	0.00533447	0.0533447	0
5.34	-0.00882587	0.00515795	0.0515795	0
5.36	-0.00853587	0.00498724	0.0498724	0
5.38	-0.00825527	0.00482213	0.0482213	0
5.4	-0.00798377	0.00466245	0.0466245	0
5.42	-0.00772108	0.00450803	0.0450803	0
5.44	-0.00746693	0.00435869	0.0435869	0
5.46	-0.00722104	0.00421427	0.0421427	0
5.48	-0.00698315	0.00407461	0.0407461	0
5.5	-0.00675301	0.00393955	0.0393955	0
5.52	-0.00653038	0.00380894	0.0380894	0
5.54	-0.006315	0.00368264	0.0368264	0
5.56	-0.00610666	0.00356051	0.0356051	0
5.58	-0.00590512	0.00344241	0.0344241	0
5.6	-0.00571017	0.0033282	0.033282	0
5.62	-0.0055216	0.00321777	0.0321777	0
5.64	-0.0053392	0.00311099	0.0311099	0
5.66	-0.00516277	0.00300773	0.0300773	0
5.68	-0.00499212	0.00290789	0.0290789	0
5.7	-0.00482707	0.00281135	0.0281135	0
5.72	-0.00466743	0.002718	0.02718	0
5.74	-0.00451303	0.00262774	0.0262774	0
5.76	-0.0043637	0.00254047	0.0254047	0
5.78	-0.00421927	0.00245608	0.0245608	0
5.8	-0.0040796	0.00237449	0.0237449	0
5.82	-0.00394451	0.0022956	0.022956	0
5.84	-0.00381387	0.00221932	0.0221932	0
5.86	-0.00368754	0.00214557	0.0214557	0
5.88	-0.00356536	0.00207426	0.0207426	0
5.9	-0.0034472	0.00200532	0.0200532	0
5.92	-0.00333294	0.00193866	0.0193866	0
5.94	-0.00322245	0.00187421	0.0187421	0
5.96	-0.0031156	0.0018119	0.018119	0
5.98	-0.00301227	0.00175165	0.0175165	0
6	-0.00291235	0.00169341	0.0169341	0
6.02	0.35	0.00869341	0.0869341	2.79943
6.04	0.35	0.0156934	0.156934	2.86943
6.06	0.35	0.0226934	0.226934	2.93943
6.08	0.35	0.0296934	0.296934	3.00943
6.1	0.35	0.0366934	0.366934	3.07943
6.12	0.35	0.0436934	0.436934	3.14943
6.14	0.35	0.0506934	0.506934	3.21943
6.16	0.35	0.0576934	0.576934	3.28943
6.18	0.35	0.0646934	0.646934	3.35943
6.2	0.35	0.0716934	0.716934	3.42943
6.22	0.35	0.0786934	0.786934	3.49943
6.24	0.35	0.0856934	0.856934	3.56943
6.26	0.35	0.0926934	0.926934	3.63943
6.28	0.35	0.0996934	0.996934	3.70943
6.3	0.35	0.106693	1.06693	3.77943
6.32	0.35	0.113693	1.13693	3.84943
6.34	0.35	0.120693	1.20693	3.91943
6.36	0.35	0.127693	1.27693	3.98943
6.38	0.35	0.134693	1.34693	4.05943
6.4	0.35	0.141693	1.41693	4.12943
6.42	0.35	0.148693	1.48693	4.19943
6.44	0.35	0.155693	1.55693	4.26943
6.46	0.35	0.162693	1.62693	4.33943
6.48	0.35	0.169693	1.69693	4.40943
6.5	0.35	0.176693	1.76693	4.47943
6.52	0.35	0.183693	1.83693	4.54943
6.54	0.35	0.190693	1.90693	4.61943
6.56	0.35	0.197693	1.97693	4.68943
6.58	0.35	0.204693	2.04693	4.75943
6.6	0.35	0.211693	2.11693	4.82943
6.62	0.35	0.218693	2.18693	4.89943
6.64	0.35	0.225693	2.25693	4.96943
6.66	0.35	0.232693	2.32693	5.03943
6.68	0.35	0.239693	2.39693	5.10943
6.7	0.35	0.246693	2.46693	5.17943
6.72	0.35	0.253693	2.53693	5.24943
6.74	0.35	0.260693	2.60693	5.31943
6.76	0.35	0.267693	2.67693	5.38943
6.78	0.35	0.274693	2.74693	5.45943
6.8	0.35	0.281693	2.81693	5.52943
6.82	0.35	0.288693	2.88693	5.59943
6.84	0.35	0.295693	2.95693	5.66943
6.86	0.35	0.302693	3.02693	5.73943
6.88	0.35	0.309693	3.09693	5.80943
6.9	0.35	0.316693	3.16693	5.87943
6.92	0.35	0.323693	3.23693	5.94943
6.94	0.35	0.330693	3.30693	6.01943
6.96	0.35	0.337693	3.37693	6.08943
6.98	0.35	0.344693	3.44693	6.15943
7	0.35	0.351693	3.51693	6.22943
7.02	0.35	0.358693	3.58693	6.29943
7.04	0.35	0.365693	3.65693	6.36943
7.06	0.35	0.372693	3.72693	6.43943
7.08	0.35	0.379693	3.79693	6.50943
7.1	0.35	0.386693	3.86693	6.57943
7.12	0.35	0.393693	3.93693	6.64943
7.14	0.35	0.400693	4.00693	6.71943
7.16	0.35	0.407693	4.07693	6.78943
7.18	0.35	0.414693	4.14693	6.85943
7.2	0.35	0.421693	4.21693	6.92943
7.22	0.35	0.428693	4.28693	6.99943
7.24	0.35	0.435693	4.35693	7.06943
7.26	0.35	0.442693	4.42693	7.13943
7.28	0.35	0.449693	4.49693	7.20943
7.3	0.35	0.456693	4.56693	7.27943
7.32	0.35	0.463693	4.63693	7.34943
7.34	0.35	0.470693	4.70693	7.41943
7.36	0.35	0.477693	4.77693	7.48943
7.38	0.35	0.484693	4.84693	7.55943
7.4	0.35	0.491693	4.91693	7.62943
7.42	0.35	0.498693	4.98693	7.69943
7.44	0.35	0.505693	5.05693	7.76943
7.46	0.35	0.512693	5.12693	7.83943
7.48	0.35	0.519693	5.19693	7.90943
7.5	0.35	0.526693	5.26693	7.97943
7.52	0.35	0.533693	5.33693	8.04943
7.54	0.35	0.540693	5.40693	8.11943
7.56	0.35	0.547693	5.47693	8.18943
7.58	0.35	0.554693	5.54693	8.25943
7.6	0.35	0.561693	5.61693	8.32943
7.62	0.35	0.568693	5.68693	8.39943
7.64	0.35	0.575693	5.75693	8.46943
7.66	0.35	0.582693	5.82693	8.53943
7.68	0.35	0.589693	5.89693	8.60943
7.7	0.35	0.596693	5.96693	8.67943
7.72	0.35	0.603693	6.03693	8.74943
7.74	0.35	0.610693	6.10693	8.81943
7.76	0.35	0.617693	6.17693	8.88943
7.78	0.35	0.624693	6.24693	8.95943
7.8	0.35	0.631693	6.31693	9.02943
7.82	0.35	0.638693	6.38693	9.09943
7.84	0.35	0.645693	6.45693	9.16943
7.86	0.35	0.652693	6.52693	9.23943
7.88	0.35	0.659693	6.59693	9.30943
7.9	0.35	0.666693	6.66693	9.37943
7.92	0.35	0.673693	6.73693	9.44943
7.94	0.35	0.680693	6.80693	9.51943
7.96	0.35	0.687693	6.87693	9.58943
7.98	0.35	0.694693	6.94693	9.65943
8	0.35	0.701693	7.01693	9.72943

## Sheet: FIG 2
								DATA 1 dashed lines
								MV =	7	l/min
								f =	10	bpm
								Ti =	2	s
								Raw =	2	cmH2O·s/l
								EL =	5	cmH2O/l
								ECW =	5	cmH2O/l
								PEEP =	0	cmH2O
								K1 =	1	cmH2O·s/l
								K2 =	5	cmH2O·(s/l)2
								DATA 2 solid lines
								MV =	7	l/min
								f =	10	bpm
								Ti =	2	s
								Raw =	5	cmH2O·s/l
								EL =	5	cmH2O/l
								ECW =	5	cmH2O/l
								PEEP =	0	cmH2O
								K1 =	1	cmH2O·s/l
								K2 =	5	cmH2O·(s/l)2

## Sheet: DATA 3
			MV =	7	l/min
			f =	10	bpm
			Ti =	2	s
			Raw =	2	cmH2O·s/l
			EL =	10	cmH2O/l
			ECW =	5	cmH2O/l
			PEEP =	0	cmH2O
			K1 =	1	cmH2O·s/l
			K2 =	5	cmH2O·(s/l)2
t	V'	V	Palv	Pao
s	l/s	l	cmH2O	cmH2O
0	0.35	0	0	1.6625
0.02	0.35	0.007	0.105	1.7675
0.04	0.35	0.014	0.21	1.8725
0.06	0.35	0.021	0.315	1.9775
0.08	0.35	0.028	0.42	2.0825
0.1	0.35	0.035	0.525	2.1875
0.12	0.35	0.042	0.63	2.2925
0.14	0.35	0.049	0.735	2.3975
0.16	0.35	0.056	0.84	2.5025
0.18	0.35	0.063	0.945	2.6075
0.2	0.35	0.07	1.05	2.7125
0.22	0.35	0.077	1.155	2.8175
0.24	0.35	0.084	1.26	2.9225
0.26	0.35	0.091	1.365	3.0275
0.28	0.35	0.098	1.47	3.1325
0.3	0.35	0.105	1.575	3.2375
0.32	0.35	0.112	1.68	3.3425
0.34	0.35	0.119	1.785	3.4475
0.36	0.35	0.126	1.89	3.5525
0.38	0.35	0.133	1.995	3.6575
0.4	0.35	0.14	2.1	3.7625
0.42	0.35	0.147	2.205	3.8675
0.44	0.35	0.154	2.31	3.9725
0.46	0.35	0.161	2.415	4.0775
0.48	0.35	0.168	2.52	4.1825
0.5	0.35	0.175	2.625	4.2875
0.52	0.35	0.182	2.73	4.3925
0.54	0.35	0.189	2.835	4.4975
0.56	0.35	0.196	2.94	4.6025
0.58	0.35	0.203	3.045	4.7075
0.6	0.35	0.21	3.15	4.8125
0.62	0.35	0.217	3.255	4.9175
0.64	0.35	0.224	3.36	5.0225
0.66	0.35	0.231	3.465	5.1275
0.68	0.35	0.238	3.57	5.2325
0.7	0.35	0.245	3.675	5.3375
0.72	0.35	0.252	3.78	5.4425
0.74	0.35	0.259	3.885	5.5475
0.76	0.35	0.266	3.99	5.6525
0.78	0.35	0.273	4.095	5.7575
0.8	0.35	0.28	4.2	5.8625
0.82	0.35	0.287	4.305	5.9675
0.84	0.35	0.294	4.41	6.0725
0.86	0.35	0.301	4.515	6.1775
0.88	0.35	0.308	4.62	6.2825
0.9	0.35	0.315	4.725	6.3875
0.92	0.35	0.322	4.83	6.4925
0.94	0.35	0.329	4.935	6.5975
0.96	0.35	0.336	5.04	6.7025
0.98	0.35	0.343	5.145	6.8075
1	0.35	0.35	5.25	6.9125
1.02	0.35	0.357	5.355	7.0175
1.04	0.35	0.364	5.46	7.1225
1.06	0.35	0.371	5.565	7.2275
1.08	0.35	0.378	5.67	7.3325
1.1	0.35	0.385	5.775	7.4375
1.12	0.35	0.392	5.88	7.5425
1.14	0.35	0.399	5.985	7.6475
1.16	0.35	0.406	6.09	7.7525
1.18	0.35	0.413	6.195	7.8575
1.2	0.35	0.42	6.3	7.9625
1.22	0.35	0.427	6.405	8.0675
1.24	0.35	0.434	6.51	8.1725
1.26	0.35	0.441	6.615	8.2775
1.28	0.35	0.448	6.72	8.3825
1.3	0.35	0.455	6.825	8.4875
1.32	0.35	0.462	6.93	8.5925
1.34	0.35	0.469	7.035	8.6975
1.36	0.35	0.476	7.14	8.8025
1.38	0.35	0.483	7.245	8.9075
1.4	0.35	0.49	7.35	9.0125
1.42	0.35	0.497	7.455	9.1175
1.44	0.35	0.504	7.56	9.2225
1.46	0.35	0.511	7.665	9.3275
1.48	0.35	0.518	7.77	9.4325
1.5	0.35	0.525	7.875	9.5375
1.52	0.35	0.532	7.98	9.6425
1.54	0.35	0.539	8.085	9.7475
1.56	0.35	0.546	8.19	9.8525
1.58	0.35	0.553	8.295	9.9575
1.6	0.35	0.56	8.4	10.0625
1.62	0.35	0.567	8.505	10.1675
1.64	0.35	0.574	8.61	10.2725
1.66	0.35	0.581	8.715	10.3775
1.68	0.35	0.588	8.82	10.4825
1.7	0.35	0.595	8.925	10.5875
1.72	0.35	0.602	9.03	10.6925
1.74	0.35	0.609	9.135	10.7975
1.76	0.35	0.616	9.24	10.9025
1.78	0.35	0.623	9.345	11.0075
1.8	0.35	0.63	9.45	11.1125
1.82	0.35	0.637	9.555	11.2175
1.84	0.35	0.644	9.66	11.3225
1.86	0.35	0.651	9.765	11.4275
1.88	0.35	0.658	9.87	11.5325
1.9	0.35	0.665	9.975	11.6375
1.92	0.35	0.672	10.08	11.7425
1.94	0.35	0.679	10.185	11.8475
1.96	0.35	0.686	10.29	11.9525
1.98	0.35	0.693	10.395	12.0575
2	0.35	0.7	10.5	12.1625
2.02	-1.17986	0.676403	10.146	0
2.04	-1.15575	0.653288	9.79932	0
2.06	-1.13173	0.630653	9.4598	0
2.08	-1.10782	0.608497	9.12745	0
2.1	-1.08401	0.586817	8.80225	0
2.12	-1.06031	0.565611	8.48416	0
2.14	-1.03672	0.544876	8.17314	0
2.16	-1.01325	0.524611	7.86917	0
2.18	-0.989893	0.504813	7.5722	0
2.2	-0.966662	0.48548	7.2822	0
2.22	-0.943556	0.466609	6.99913	0
2.24	-0.920582	0.448197	6.72296	0
2.26	-0.897742	0.430243	6.45364	0
2.28	-0.875041	0.412742	6.19113	0
2.3	-0.852484	0.395692	5.93538	0
2.32	-0.830075	0.379091	5.68636	0
2.34	-0.80782	0.362934	5.44401	0
2.36	-0.785724	0.34722	5.20829	0
2.38	-0.763792	0.331944	4.97916	0
2.4	-0.74203	0.317103	4.75655	0
2.42	-0.720443	0.302694	4.54042	0
2.44	-0.699039	0.288714	4.3307	0
2.46	-0.677822	0.275157	4.12736	0
2.48	-0.656801	0.262021	3.93032	0
2.5	-0.635981	0.249301	3.73952	0
2.52	-0.615369	0.236994	3.55491	0
2.54	-0.594974	0.225095	3.37642	0
2.56	-0.574803	0.213599	3.20398	0
2.58	-0.554864	0.202501	3.03752	0
2.6	-0.535165	0.191798	2.87697	0
2.62	-0.515715	0.181484	2.72225	0
2.64	-0.496523	0.171553	2.5733	0
2.66	-0.477597	0.162001	2.43002	0
2.68	-0.458948	0.152822	2.29233	0
2.7	-0.440584	0.144011	2.16016	0
2.72	-0.422517	0.13556	2.0334	0
2.74	-0.404755	0.127465	1.91198	0
2.76	-0.387309	0.119719	1.79578	0
2.78	-0.370191	0.112315	1.68473	0
2.8	-0.35341	0.105247	1.5787	0
2.82	-0.336977	0.0985074	1.47761	0
2.84	-0.320904	0.0920894	1.38134	0
2.86	-0.3052	0.0859854	1.28978	0
2.88	-0.289877	0.0801878	1.20282	0
2.9	-0.274946	0.0746889	1.12033	0
2.92	-0.260416	0.0694806	1.04221	0
2.94	-0.246298	0.0645546	0.968319	0
2.96	-0.232601	0.0599026	0.898539	0
2.98	-0.219334	0.0555159	0.832739	0
3	-0.206505	0.0513858	0.770788	0
3.02	-0.194123	0.0475034	0.712551	0
3.04	-0.182193	0.0438595	0.657893	0
3.06	-0.170721	0.0404451	0.606677	0
3.08	-0.159712	0.0372509	0.558763	0
3.1	-0.149169	0.0342675	0.514012	0
3.12	-0.139093	0.0314856	0.472285	0
3.14	-0.129484	0.028896	0.433439	0
3.16	-0.120342	0.0264891	0.397337	0
3.18	-0.111664	0.0242558	0.363837	0
3.2	-0.103444	0.0221869	0.332804	0
3.22	-0.0956776	0.0202734	0.304101	0
3.24	-0.0883556	0.0185063	0.277594	0
3.26	-0.0814692	0.0168769	0.253153	0
3.28	-0.0750075	0.0153767	0.230651	0
3.3	-0.0689582	0.0139976	0.209964	0
3.32	-0.063308	0.0127314	0.190971	0
3.34	-0.0580422	0.0115706	0.173559	0
3.36	-0.0531454	0.0105077	0.157615	0
3.38	-0.0486015	0.00953564	0.143035	0
3.4	-0.0443935	0.00864777	0.129716	0
3.42	-0.0405045	0.00783768	0.117565	0
3.44	-0.0369169	0.00709934	0.10649	0
3.46	-0.0336136	0.00642707	0.096406	0
3.48	-0.0305771	0.00581553	0.0872329	0
3.5	-0.0277904	0.00525972	0.0788958	0
3.52	-0.0252371	0.00475498	0.0713246	0
3.54	-0.0229008	0.00429696	0.0644544	0
3.56	-0.0207661	0.00388164	0.0582246	0
3.58	-0.018818	0.00350528	0.0525792	0
3.6	-0.0170423	0.00316443	0.0474665	0
3.62	-0.0154256	0.00285592	0.0428388	0
3.64	-0.013955	0.00257682	0.0386523	0
3.66	-0.0126187	0.00232445	0.0348667	0
3.68	-0.0114054	0.00209634	0.0314451	0
3.7	-0.0103047	0.00189024	0.0283536	0
3.72	-0.00930685	0.00170411	0.0255616	0
3.74	-0.00840285	0.00153605	0.0230407	0
3.76	-0.00758437	0.00138436	0.0207654	0
3.78	-0.00684375	0.00124749	0.0187123	0
3.8	-0.00617391	0.00112401	0.0168601	0
3.82	-0.00556837	0.00101264	0.0151896	0
3.84	-0.00502119	0.000912218	0.0136833	0
3.86	-0.00452693	0.000821679	0.0123252	0
3.88	-0.00408064	0.000740066	0.011101	0
3.9	-0.00367779	0.00066651	0.00999766	0
3.92	-0.00331425	0.000600226	0.00900338	0
3.94	-0.00298626	0.0005405	0.0081075	0
3.96	-0.00269044	0.000486692	0.00730037	0
3.98	-0.00242367	0.000438218	0.00657327	0
4	-0.00218315	0.000394555	0.00591833	0
4.02	-0.00196633	0.000355229	0.00532843	0
4.04	-0.00177092	0.00031981	0.00479715	0
4.06	-0.00159481	0.000287914	0.00431871	0
4.08	-0.00143613	0.000259191	0.00388787	0
4.1	-0.00129317	0.000233328	0.00349992	0
4.12	-0.00116438	0.00021004	0.00315061	0
4.14	-0.00104837	0.000189073	0.00283609	0
4.16	-0.00094388	0.000170195	0.00255293	0
4.18	-0.000849773	0.0001532	0.002298	0
4.2	-0.000765024	0.000137899	0.00206849	0
4.22	-0.000688707	0.000124125	0.00186188	0
4.24	-0.000619986	0.000111726	0.00167588	0
4.26	-0.000558109	0.000100563	0.00150845	0
4.28	-0.000502396	9.05155e-05	0.00135773	0
4.3	-0.000452237	8.14707e-05	0.00122206	0
4.32	-0.000407078	7.33292e-05	0.00109994	0
4.34	-0.000366422	6.60008e-05	0.000990011	0
4.36	-0.000329822	5.94043e-05	0.000891065	0
4.38	-0.000296875	5.34668e-05	0.000802002	0
4.4	-0.000267215	4.81225e-05	0.000721838	0
4.42	-0.000240516	4.33122e-05	0.000649683	0
4.44	-0.000216483	3.89825e-05	0.000584738	0
4.46	-0.000194849	3.50855e-05	0.000526283	0
4.48	-0.000175376	3.1578e-05	0.00047367	0
4.5	-0.000157849	2.8421e-05	0.000426316	0
4.52	-0.000142072	2.55796e-05	0.000383694	0
4.54	-0.000127871	2.30222e-05	0.000345333	0
4.56	-0.000115089	2.07204e-05	0.000310806	0
4.58	-0.000103584	1.86487e-05	0.000279731	0
4.6	-9.32292e-05	1.67841e-05	0.000251762	0
4.62	-8.3909e-05	1.5106e-05	0.00022659	0
4.64	-7.55203e-05	1.35956e-05	0.000203933	0
4.66	-6.79701e-05	1.22362e-05	0.000183542	0
4.68	-6.11746e-05	1.10127e-05	0.00016519	0
4.7	-5.50583e-05	9.9115e-06	0.000148673	0
4.72	-4.95534e-05	8.92043e-06	0.000133807	0
4.74	-4.45989e-05	8.02846e-06	0.000120427	0
4.76	-4.01396e-05	7.22567e-06	0.000108385	0
4.78	-3.61262e-05	6.50314e-06	9.75471e-05	0
4.8	-3.25139e-05	5.85286e-06	8.77929e-05	0
4.82	-2.92629e-05	5.26761e-06	7.90141e-05	0
4.84	-2.63369e-05	4.74087e-06	7.1113e-05	0
4.86	-2.37034e-05	4.2668e-06	6.4002e-05	0
4.88	-2.13332e-05	3.84014e-06	5.7602e-05	0
4.9	-1.92001e-05	3.45613e-06	5.1842e-05	0
4.92	-1.72802e-05	3.11053e-06	4.6658e-05	0
4.94	-1.55522e-05	2.79949e-06	4.19923e-05	0
4.96	-1.39971e-05	2.51954e-06	3.77932e-05	0
4.98	-1.25975e-05	2.26759e-06	3.40139e-05	0
5	-1.13378e-05	2.04084e-06	3.06126e-05	0
5.02	-1.0204e-05	1.83676e-06	2.75514e-05	0
5.04	-9.18365e-06	1.65309e-06	2.47963e-05	0
5.06	-8.26531e-06	1.48778e-06	2.23167e-05	0
5.08	-7.43881e-06	1.339e-06	2.00851e-05	0
5.1	-6.69494e-06	1.2051e-06	1.80766e-05	0
5.12	-6.02546e-06	1.0846e-06	1.62689e-05	0
5.14	-5.42293e-06	9.76137e-07	1.46421e-05	0
5.16	-4.88064e-06	8.78524e-07	1.31779e-05	0
5.18	-4.39259e-06	7.90672e-07	1.18601e-05	0
5.2	-3.95333e-06	7.11605e-07	1.06741e-05	0
5.22	-3.55801e-06	6.40445e-07	9.60668e-06	0
5.24	-3.20221e-06	5.76401e-07	8.64602e-06	0
5.26	-2.88199e-06	5.18761e-07	7.78142e-06	0
5.28	-2.5938e-06	4.66885e-07	7.00328e-06	0
5.3	-2.33442e-06	4.20197e-07	6.30296e-06	0
5.32	-2.10098e-06	3.78177e-07	5.67266e-06	0
5.34	-1.89088e-06	3.4036e-07	5.1054e-06	0
5.36	-1.70179e-06	3.06324e-07	4.59486e-06	0
5.38	-1.53162e-06	2.75692e-07	4.13537e-06	0
5.4	-1.37845e-06	2.48123e-07	3.72184e-06	0
5.42	-1.24061e-06	2.2331e-07	3.34965e-06	0
5.44	-1.11655e-06	2.00979e-07	3.01469e-06	0
5.46	-1.0049e-06	1.80881e-07	2.71322e-06	0
5.48	-9.04406e-07	1.62793e-07	2.4419e-06	0
5.5	-8.13965e-07	1.46514e-07	2.19771e-06	0
5.52	-7.32569e-07	1.31863e-07	1.97794e-06	0
5.54	-6.59312e-07	1.18676e-07	1.78015e-06	0
5.56	-5.93381e-07	1.06809e-07	1.60213e-06	0
5.58	-5.34043e-07	9.61279e-08	1.44192e-06	0
5.6	-4.80639e-07	8.65151e-08	1.29773e-06	0
5.62	-4.32575e-07	7.78636e-08	1.16795e-06	0
5.64	-3.89318e-07	7.00772e-08	1.05116e-06	0
5.66	-3.50386e-07	6.30695e-08	9.46043e-07	0
5.68	-3.15347e-07	5.67626e-08	8.51439e-07	0
5.7	-2.83813e-07	5.10863e-08	7.66295e-07	0
5.72	-2.55431e-07	4.59777e-08	6.89665e-07	0
5.74	-2.29888e-07	4.13799e-08	6.20699e-07	0
5.76	-2.069e-07	3.72419e-08	5.58629e-07	0
5.78	-1.8621e-07	3.35177e-08	5.02766e-07	0
5.8	-1.67589e-07	3.0166e-08	4.5249e-07	0
5.82	-1.5083e-07	2.71494e-08	4.07241e-07	0
5.84	-1.35747e-07	2.44344e-08	3.66517e-07	0
5.86	-1.22172e-07	2.1991e-08	3.29865e-07	0
5.88	-1.09955e-07	1.97919e-08	2.96878e-07	0
5.9	-9.89595e-08	1.78127e-08	2.67191e-07	0
5.92	-8.90635e-08	1.60314e-08	2.40472e-07	0
5.94	-8.01572e-08	1.44283e-08	2.16424e-07	0
5.96	-7.21414e-08	1.29855e-08	1.94782e-07	0
5.98	-6.49273e-08	1.16869e-08	1.75304e-07	0
6	-5.84346e-08	1.05182e-08	1.57773e-07	0
6.02	0.35	0.00700001	0.105	1.7675
6.04	0.35	0.014	0.21	1.8725
6.06	0.35	0.021	0.315	1.9775
6.08	0.35	0.028	0.42	2.0825
6.1	0.35	0.035	0.525	2.1875
6.12	0.35	0.042	0.63	2.2925
6.14	0.35	0.049	0.735	2.3975
6.16	0.35	0.056	0.84	2.5025
6.18	0.35	0.063	0.945	2.6075
6.2	0.35	0.07	1.05	2.7125
6.22	0.35	0.077	1.155	2.8175
6.24	0.35	0.084	1.26	2.9225
6.26	0.35	0.091	1.365	3.0275
6.28	0.35	0.098	1.47	3.1325
6.3	0.35	0.105	1.575	3.2375
6.32	0.35	0.112	1.68	3.3425
6.34	0.35	0.119	1.785	3.4475
6.36	0.35	0.126	1.89	3.5525
6.38	0.35	0.133	1.995	3.6575
6.4	0.35	0.14	2.1	3.7625
6.42	0.35	0.147	2.205	3.8675
6.44	0.35	0.154	2.31	3.9725
6.46	0.35	0.161	2.415	4.0775
6.48	0.35	0.168	2.52	4.1825
6.5	0.35	0.175	2.625	4.2875
6.52	0.35	0.182	2.73	4.3925
6.54	0.35	0.189	2.835	4.4975
6.56	0.35	0.196	2.94	4.6025
6.58	0.35	0.203	3.045	4.7075
6.6	0.35	0.21	3.15	4.8125
6.62	0.35	0.217	3.255	4.9175
6.64	0.35	0.224	3.36	5.0225
6.66	0.35	0.231	3.465	5.1275
6.68	0.35	0.238	3.57	5.2325
6.7	0.35	0.245	3.675	5.3375
6.72	0.35	0.252	3.78	5.4425
6.74	0.35	0.259	3.885	5.5475
6.76	0.35	0.266	3.99	5.6525
6.78	0.35	0.273	4.095	5.7575
6.8	0.35	0.28	4.2	5.8625
6.82	0.35	0.287	4.305	5.9675
6.84	0.35	0.294	4.41	6.0725
6.86	0.35	0.301	4.515	6.1775
6.88	0.35	0.308	4.62	6.2825
6.9	0.35	0.315	4.725	6.3875
6.92	0.35	0.322	4.83	6.4925
6.94	0.35	0.329	4.935	6.5975
6.96	0.35	0.336	5.04	6.7025
6.98	0.35	0.343	5.145	6.8075
7	0.35	0.35	5.25	6.9125
7.02	0.35	0.357	5.355	7.0175
7.04	0.35	0.364	5.46	7.1225
7.06	0.35	0.371	5.565	7.2275
7.08	0.35	0.378	5.67	7.3325
7.1	0.35	0.385	5.775	7.4375
7.12	0.35	0.392	5.88	7.5425
7.14	0.35	0.399	5.985	7.6475
7.16	0.35	0.406	6.09	7.7525
7.18	0.35	0.413	6.195	7.8575
7.2	0.35	0.42	6.3	7.9625
7.22	0.35	0.427	6.405	8.0675
7.24	0.35	0.434	6.51	8.1725
7.26	0.35	0.441	6.615	8.2775
7.28	0.35	0.448	6.72	8.3825
7.3	0.35	0.455	6.825	8.4875
7.32	0.35	0.462	6.93	8.5925
7.34	0.35	0.469	7.035	8.6975
7.36	0.35	0.476	7.14	8.8025
7.38	0.35	0.483	7.245	8.9075
7.4	0.35	0.49	7.35	9.0125
7.42	0.35	0.497	7.455	9.1175
7.44	0.35	0.504	7.56	9.2225
7.46	0.35	0.511	7.665	9.3275
7.48	0.35	0.518	7.77	9.4325
7.5	0.35	0.525	7.875	9.5375
7.52	0.35	0.532	7.98	9.6425
7.54	0.35	0.539	8.085	9.7475
7.56	0.35	0.546	8.19	9.8525
7.58	0.35	0.553	8.295	9.9575
7.6	0.35	0.56	8.4	10.0625
7.62	0.35	0.567	8.505	10.1675
7.64	0.35	0.574	8.61	10.2725
7.66	0.35	0.581	8.715	10.3775
7.68	0.35	0.588	8.82	10.4825
7.7	0.35	0.595	8.925	10.5875
7.72	0.35	0.602	9.03	10.6925
7.74	0.35	0.609	9.135	10.7975
7.76	0.35	0.616	9.24	10.9025
7.78	0.35	0.623	9.345	11.0075
7.8	0.35	0.63	9.45	11.1125
7.82	0.35	0.637	9.555	11.2175
7.84	0.35	0.644	9.66	11.3225
7.86	0.35	0.651	9.765	11.4275
7.88	0.35	0.658	9.87	11.5325
7.9	0.35	0.665	9.975	11.6375
7.92	0.35	0.672	10.08	11.7425
7.94	0.35	0.679	10.185	11.8475
7.96	0.35	0.686	10.29	11.9525
7.98	0.35	0.693	10.395	12.0575
8	0.35	0.7	10.5	12.1625

## Sheet: DATA 4
			MV =	7	l/min
			f =	10	bpm
			Ti =	2	s
			Raw =	5	cmH2O·s/l
			EL =	10	cmH2O/l
			ECW =	5	cmH2O/l
			PEEP =	0	cmH2O
			K1 =	1	cmH2O·s/l
			K2 =	5	cmH2O·(s/l)2
t	V'	V	Palv	Pao
s	l/s	l	cmH2O	cmH2O
0	0.35	0	0	2.7125
0.02	0.35	0.007	0.105	2.8175
0.04	0.35	0.014	0.21	2.9225
0.06	0.35	0.021	0.315	3.0275
0.08	0.35	0.028	0.42	3.1325
0.1	0.35	0.035	0.525	3.2375
0.12	0.35	0.042	0.63	3.3425
0.14	0.35	0.049	0.735	3.4475
0.16	0.35	0.056	0.84	3.5525
0.18	0.35	0.063	0.945	3.6575
0.2	0.35	0.07	1.05	3.7625
0.22	0.35	0.077	1.155	3.8675
0.24	0.35	0.084	1.26	3.9725
0.26	0.35	0.091	1.365	4.0775
0.28	0.35	0.098	1.47	4.1825
0.3	0.35	0.105	1.575	4.2875
0.32	0.35	0.112	1.68	4.3925
0.34	0.35	0.119	1.785	4.4975
0.36	0.35	0.126	1.89	4.6025
0.38	0.35	0.133	1.995	4.7075
0.4	0.35	0.14	2.1	4.8125
0.42	0.35	0.147	2.205	4.9175
0.44	0.35	0.154	2.31	5.0225
0.46	0.35	0.161	2.415	5.1275
0.48	0.35	0.168	2.52	5.2325
0.5	0.35	0.175	2.625	5.3375
0.52	0.35	0.182	2.73	5.4425
0.54	0.35	0.189	2.835	5.5475
0.56	0.35	0.196	2.94	5.6525
0.58	0.35	0.203	3.045	5.7575
0.6	0.35	0.21	3.15	5.8625
0.62	0.35	0.217	3.255	5.9675
0.64	0.35	0.224	3.36	6.0725
0.66	0.35	0.231	3.465	6.1775
0.68	0.35	0.238	3.57	6.2825
0.7	0.35	0.245	3.675	6.3875
0.72	0.35	0.252	3.78	6.4925
0.74	0.35	0.259	3.885	6.5975
0.76	0.35	0.266	3.99	6.7025
0.78	0.35	0.273	4.095	6.8075
0.8	0.35	0.28	4.2	6.9125
0.82	0.35	0.287	4.305	7.0175
0.84	0.35	0.294	4.41	7.1225
0.86	0.35	0.301	4.515	7.2275
0.88	0.35	0.308	4.62	7.3325
0.9	0.35	0.315	4.725	7.4375
0.92	0.35	0.322	4.83	7.5425
0.94	0.35	0.329	4.935	7.6475
0.96	0.35	0.336	5.04	7.7525
0.98	0.35	0.343	5.145	7.8575
1	0.35	0.35	5.25	7.9625
1.02	0.35	0.357	5.355	8.0675
1.04	0.35	0.364	5.46	8.1725
1.06	0.35	0.371	5.565	8.2775
1.08	0.35	0.378	5.67	8.3825
1.1	0.35	0.385	5.775	8.4875
1.12	0.35	0.392	5.88	8.5925
1.14	0.35	0.399	5.985	8.6975
1.16	0.35	0.406	6.09	8.8025
1.18	0.35	0.413	6.195	8.9075
1.2	0.35	0.42	6.3	9.0125
1.22	0.35	0.427	6.405	9.1175
1.24	0.35	0.434	6.51	9.2225
1.26	0.35	0.441	6.615	9.3275
1.28	0.35	0.448	6.72	9.4325
1.3	0.35	0.455	6.825	9.5375
1.32	0.35	0.462	6.93	9.6425
1.34	0.35	0.469	7.035	9.7475
1.36	0.35	0.476	7.14	9.8525
1.38	0.35	0.483	7.245	9.9575
1.4	0.35	0.49	7.35	10.0625
1.42	0.35	0.497	7.455	10.1675
1.44	0.35	0.504	7.56	10.2725
1.46	0.35	0.511	7.665	10.3775
1.48	0.35	0.518	7.77	10.4825
1.5	0.35	0.525	7.875	10.5875
1.52	0.35	0.532	7.98	10.6925
1.54	0.35	0.539	8.085	10.7975
1.56	0.35	0.546	8.19	10.9025
1.58	0.35	0.553	8.295	11.0075
1.6	0.35	0.56	8.4	11.1125
1.62	0.35	0.567	8.505	11.2175
1.64	0.35	0.574	8.61	11.3225
1.66	0.35	0.581	8.715	11.4275
1.68	0.35	0.588	8.82	11.5325
1.7	0.35	0.595	8.925	11.6375
1.72	0.35	0.602	9.03	11.7425
1.74	0.35	0.609	9.135	11.8475
1.76	0.35	0.616	9.24	11.9525
1.78	0.35	0.623	9.345	12.0575
1.8	0.35	0.63	9.45	12.1625
1.82	0.35	0.637	9.555	12.2675
1.84	0.35	0.644	9.66	12.3725
1.86	0.35	0.651	9.765	12.4775
1.88	0.35	0.658	9.87	12.5825
1.9	0.35	0.665	9.975	12.6875
1.92	0.35	0.672	10.08	12.7925
1.94	0.35	0.679	10.185	12.8975
1.96	0.35	0.686	10.29	13.0025
1.98	0.35	0.693	10.395	13.1075
2	0.35	0.7	10.5	13.2125
2.02	-0.968436	0.680631	10.2095	0
2.04	-0.949802	0.661635	9.92453	0
2.06	-0.931306	0.643009	9.64514	0
2.08	-0.912951	0.62475	9.37125	0
2.1	-0.894738	0.606855	9.10283	0
2.12	-0.876672	0.589322	8.83983	0
2.14	-0.858753	0.572147	8.5822	0
2.16	-0.840984	0.555327	8.32991	0
2.18	-0.823368	0.53886	8.0829	0
2.2	-0.805907	0.522742	7.84113	0
2.22	-0.788603	0.50697	7.60454	0
2.24	-0.77146	0.49154	7.37311	0
2.26	-0.75448	0.476451	7.14676	0
2.28	-0.737665	0.461698	6.92546	0
2.3	-0.721018	0.447277	6.70916	0
2.32	-0.704541	0.433186	6.4978	0
2.34	-0.688237	0.419422	6.29132	0
2.36	-0.672109	0.405979	6.08969	0
2.38	-0.656159	0.392856	5.89284	0
2.4	-0.640389	0.380048	5.70073	0
2.42	-0.624803	0.367552	5.51329	0
2.44	-0.609402	0.355364	5.33047	0
2.46	-0.59419	0.343481	5.15221	0
2.48	-0.579169	0.331897	4.97846	0
2.5	-0.56434	0.32061	4.80916	0
2.52	-0.549708	0.309616	4.64424	0
2.54	-0.535274	0.298911	4.48366	0
2.56	-0.52104	0.28849	4.32735	0
2.58	-0.507008	0.27835	4.17525	0
2.6	-0.493182	0.268486	4.02729	0
2.62	-0.479563	0.258895	3.88342	0
2.64	-0.466153	0.249572	3.74358	0
2.66	-0.452955	0.240513	3.60769	0
2.68	-0.439969	0.231713	3.4757	0
2.7	-0.427199	0.223169	3.34754	0
2.72	-0.414646	0.214876	3.22315	0
2.74	-0.402311	0.20683	3.10245	0
2.76	-0.390197	0.199026	2.98539	0
2.78	-0.378303	0.19146	2.8719	0
2.8	-0.366633	0.184128	2.76191	0
2.82	-0.355187	0.177024	2.65536	0
2.84	-0.343965	0.170145	2.55217	0
2.86	-0.33297	0.163485	2.45228	0
2.88	-0.322201	0.157041	2.35562	0
2.9	-0.311659	0.150808	2.26212	0
2.92	-0.301345	0.144781	2.17172	0
2.94	-0.291259	0.138956	2.08434	0
2.96	-0.2814	0.133328	1.99992	0
2.98	-0.27177	0.127892	1.91839	0
3	-0.262367	0.122645	1.83968	0
3.02	-0.253191	0.117581	1.76372	0
3.04	-0.244241	0.112696	1.69045	0
3.06	-0.235517	0.107986	1.61979	0
3.08	-0.227017	0.103446	1.55169	0
3.1	-0.218741	0.0990709	1.48606	0
3.12	-0.210686	0.0948572	1.42286	0
3.14	-0.202852	0.0908002	1.362	0
3.16	-0.195236	0.0868955	1.30343	0
3.18	-0.187836	0.0831387	1.24708	0
3.2	-0.180651	0.0795257	1.19289	0
3.22	-0.173677	0.0760522	1.14078	0
3.24	-0.166913	0.0727139	1.09071	0
3.26	-0.160356	0.0695068	1.0426	0
3.28	-0.154003	0.0664267	0.996401	0
3.3	-0.14785	0.0634697	0.952046	0
3.32	-0.141896	0.0606318	0.909477	0
3.34	-0.136135	0.0579091	0.868636	0
3.36	-0.130566	0.0552978	0.829467	0
3.38	-0.125185	0.0527941	0.791911	0
3.4	-0.119988	0.0503943	0.755915	0
3.42	-0.114971	0.0480949	0.721424	0
3.44	-0.11013	0.0458923	0.688385	0
3.46	-0.105462	0.0437831	0.656746	0
3.48	-0.100963	0.0417638	0.626457	0
3.5	-0.0966286	0.0398312	0.597469	0
3.52	-0.0924548	0.0379821	0.569732	0
3.54	-0.0884376	0.0362134	0.543201	0
3.56	-0.0845729	0.0345219	0.517829	0
3.58	-0.0808566	0.0329048	0.493572	0
3.6	-0.0772845	0.0313591	0.470387	0
3.62	-0.0738526	0.0298821	0.448231	0
3.64	-0.0705566	0.0284709	0.427064	0
3.66	-0.0673925	0.0271231	0.406846	0
3.68	-0.0643562	0.0258359	0.387539	0
3.7	-0.0614437	0.0246071	0.369106	0
3.72	-0.058651	0.0234341	0.351511	0
3.74	-0.0559742	0.0223146	0.334719	0
3.76	-0.0534093	0.0212464	0.318696	0
3.78	-0.0509525	0.0202273	0.30341	0
3.8	-0.0486	0.0192553	0.28883	0
3.82	-0.0463482	0.0183284	0.274926	0
3.84	-0.0441934	0.0174445	0.261668	0
3.86	-0.042132	0.0166019	0.249028	0
3.88	-0.0401606	0.0157987	0.23698	0
3.9	-0.0382758	0.0150331	0.225497	0
3.92	-0.0364742	0.0143037	0.214555	0
3.94	-0.0347527	0.0136086	0.204129	0
3.96	-0.033108	0.0129464	0.194197	0
3.98	-0.0315373	0.0123157	0.184735	0
4	-0.0300374	0.0117149	0.175724	0
4.02	-0.0286055	0.0111428	0.167143	0
4.04	-0.0272388	0.0105981	0.158971	0
4.06	-0.0259346	0.0100794	0.151191	0
4.08	-0.0246904	0.00958556	0.143783	0
4.1	-0.0235035	0.00911549	0.136732	0
4.12	-0.0223716	0.00866806	0.130021	0
4.14	-0.0212923	0.00824221	0.123633	0
4.16	-0.0202634	0.00783694	0.117554	0
4.18	-0.0192825	0.00745129	0.111769	0
4.2	-0.0183477	0.00708434	0.106265	0
4.22	-0.0174569	0.0067352	0.101028	0
4.24	-0.0166081	0.00640304	0.0960456	0
4.26	-0.0157996	0.00608705	0.0913057	0
4.28	-0.0150294	0.00578646	0.0867969	0
4.3	-0.0142958	0.00550054	0.0825081	0
4.32	-0.0135973	0.0052286	0.078429	0
4.34	-0.0129321	0.00496995	0.0745493	0
4.36	-0.0122988	0.00472398	0.0708597	0
4.38	-0.0116959	0.00449006	0.0673509	0
4.4	-0.0111221	0.00426762	0.0640143	0
4.42	-0.0105758	0.0040561	0.0608415	0
4.44	-0.010056	0.00385498	0.0578247	0
4.46	-0.00956127	0.00366376	0.0549563	0
4.48	-0.00909052	0.00348195	0.0522292	0
4.5	-0.00864262	0.00330909	0.0496364	0
4.52	-0.00821647	0.00314476	0.0471715	0
4.54	-0.00781106	0.00298854	0.0448281	0
4.56	-0.00742541	0.00284003	0.0426005	0
4.58	-0.00705857	0.00269886	0.0404829	0
4.6	-0.00670964	0.00256467	0.03847	0
4.62	-0.00637778	0.00243711	0.0365567	0
4.64	-0.00606216	0.00231587	0.0347381	0
4.66	-0.00576201	0.00220063	0.0330095	0
4.68	-0.00547658	0.0020911	0.0313665	0
4.7	-0.00520517	0.001987	0.0298049	0
4.72	-0.00494709	0.00188805	0.0283208	0
4.74	-0.00470171	0.00179402	0.0269103	0
4.76	-0.00446841	0.00170465	0.0255698	0
4.78	-0.0042466	0.00161972	0.0242958	0
4.8	-0.00403573	0.001539	0.0230851	0
4.82	-0.00383525	0.0014623	0.0219345	0
4.84	-0.00364468	0.00138941	0.0208411	0
4.86	-0.00346352	0.00132014	0.019802	0
4.88	-0.00329131	0.00125431	0.0188146	0
4.9	-0.00312762	0.00119176	0.0178764	0
4.92	-0.00297203	0.00113232	0.0169847	0
4.94	-0.00282414	0.00107583	0.0161375	0
4.96	-0.00268358	0.00102216	0.0153324	0
4.98	-0.00254999	0.000971162	0.0145674	0
5	-0.00242301	0.000922702	0.0138405	0
5.02	-0.00230234	0.000876655	0.0131498	0
5.04	-0.00218765	0.000832902	0.0124935	0
5.06	-0.00207865	0.000791329	0.0118699	0
5.08	-0.00197507	0.000751828	0.0112774	0
5.1	-0.00187663	0.000714295	0.0107144	0
5.12	-0.00178309	0.000678633	0.0101795	0
5.14	-0.00169419	0.000644749	0.00967124	0
5.16	-0.00160971	0.000612555	0.00918833	0
5.18	-0.00152944	0.000581966	0.0087295	0
5.2	-0.00145316	0.000552903	0.00829355	0
5.22	-0.00138067	0.00052529	0.00787935	0
5.24	-0.00131179	0.000499054	0.00748581	0
5.26	-0.00124634	0.000474127	0.00711191	0
5.28	-0.00118415	0.000450444	0.00675666	0
5.3	-0.00112506	0.000427943	0.00641915	0
5.32	-0.00106891	0.000406565	0.00609848	0
5.34	-0.00101555	0.000386254	0.00579381	0
5.36	-0.000964859	0.000366957	0.00550435	0
5.38	-0.000916692	0.000348623	0.00522934	0
5.4	-0.000870925	0.000331204	0.00496807	0
5.42	-0.000827441	0.000314656	0.00471983	0
5.44	-0.000786124	0.000298933	0.004484	0
5.46	-0.000746868	0.000283996	0.00425994	0
5.48	-0.00070957	0.000269804	0.00404707	0
5.5	-0.000674132	0.000256322	0.00384483	0
5.52	-0.000640463	0.000243512	0.00365269	0
5.54	-0.000608473	0.000231343	0.00347015	0
5.56	-0.000578079	0.000219781	0.00329672	0
5.58	-0.000549202	0.000208797	0.00313196	0
5.6	-0.000521767	0.000198362	0.00297543	0
5.62	-0.0004957	0.000188448	0.00282672	0
5.64	-0.000470935	0.000179029	0.00268544	0
5.66	-0.000447407	0.000170081	0.00255122	0
5.68	-0.000425053	0.00016158	0.0024237	0
5.7	-0.000403815	0.000153504	0.00230256	0
5.72	-0.000383637	0.000145831	0.00218747	0
5.74	-0.000364467	0.000138542	0.00207813	0
5.76	-0.000346255	0.000131617	0.00197425	0
5.78	-0.000328952	0.000125038	0.00187557	0
5.8	-0.000312513	0.000118787	0.00178181	0
5.82	-0.000296895	0.00011285	0.00169274	0
5.84	-0.000282058	0.000107208	0.00160813	0
5.86	-0.000267961	0.000101849	0.00152774	0
5.88	-0.000254569	9.67578e-05	0.00145137	0
5.9	-0.000241846	9.19209e-05	0.00137881	0
5.92	-0.000229758	8.73257e-05	0.00130989	0
5.94	-0.000218275	8.29602e-05	0.0012444	0
5.96	-0.000207365	7.88129e-05	0.00118219	0
5.98	-0.000197	7.48729e-05	0.00112309	0
6	-0.000187153	7.11298e-05	0.00106695	0
6.02	0.35	0.00707113	0.106067	2.81857
6.04	0.35	0.0140711	0.211067	2.92357
6.06	0.35	0.0210711	0.316067	3.02857
6.08	0.35	0.0280711	0.421067	3.13357
6.1	0.35	0.0350711	0.526067	3.23857
6.12	0.35	0.0420711	0.631067	3.34357
6.14	0.35	0.0490711	0.736067	3.44857
6.16	0.35	0.0560711	0.841067	3.55357
6.18	0.35	0.0630711	0.946067	3.65857
6.2	0.35	0.0700711	1.05107	3.76357
6.22	0.35	0.0770711	1.15607	3.86857
6.24	0.35	0.0840711	1.26107	3.97357
6.26	0.35	0.0910711	1.36607	4.07857
6.28	0.35	0.0980711	1.47107	4.18357
6.3	0.35	0.105071	1.57607	4.28857
6.32	0.35	0.112071	1.68107	4.39357
6.34	0.35	0.119071	1.78607	4.49857
6.36	0.35	0.126071	1.89107	4.60357
6.38	0.35	0.133071	1.99607	4.70857
6.4	0.35	0.140071	2.10107	4.81357
6.42	0.35	0.147071	2.20607	4.91857
6.44	0.35	0.154071	2.31107	5.02357
6.46	0.35	0.161071	2.41607	5.12857
6.48	0.35	0.168071	2.52107	5.23357
6.5	0.35	0.175071	2.62607	5.33857
6.52	0.35	0.182071	2.73107	5.44357
6.54	0.35	0.189071	2.83607	5.54857
6.56	0.35	0.196071	2.94107	5.65357
6.58	0.35	0.203071	3.04607	5.75857
6.6	0.35	0.210071	3.15107	5.86357
6.62	0.35	0.217071	3.25607	5.96857
6.64	0.35	0.224071	3.36107	6.07357
6.66	0.35	0.231071	3.46607	6.17857
6.68	0.35	0.238071	3.57107	6.28357
6.7	0.35	0.245071	3.67607	6.38857
6.72	0.35	0.252071	3.78107	6.49357
6.74	0.35	0.259071	3.88607	6.59857
6.76	0.35	0.266071	3.99107	6.70357
6.78	0.35	0.273071	4.09607	6.80857
6.8	0.35	0.280071	4.20107	6.91357
6.82	0.35	0.287071	4.30607	7.01857
6.84	0.35	0.294071	4.41107	7.12357
6.86	0.35	0.301071	4.51607	7.22857
6.88	0.35	0.308071	4.62107	7.33357
6.9	0.35	0.315071	4.72607	7.43857
6.92	0.35	0.322071	4.83107	7.54357
6.94	0.35	0.329071	4.93607	7.64857
6.96	0.35	0.336071	5.04107	7.75357
6.98	0.35	0.343071	5.14607	7.85857
7	0.35	0.350071	5.25107	7.96357
7.02	0.35	0.357071	5.35607	8.06857
7.04	0.35	0.364071	5.46107	8.17357
7.06	0.35	0.371071	5.56607	8.27857
7.08	0.35	0.378071	5.67107	8.38357
7.1	0.35	0.385071	5.77607	8.48857
7.12	0.35	0.392071	5.88107	8.59357
7.14	0.35	0.399071	5.98607	8.69857
7.16	0.35	0.406071	6.09107	8.80357
7.18	0.35	0.413071	6.19607	8.90857
7.2	0.35	0.420071	6.30107	9.01357
7.22	0.35	0.427071	6.40607	9.11857
7.24	0.35	0.434071	6.51107	9.22357
7.26	0.35	0.441071	6.61607	9.32857
7.28	0.35	0.448071	6.72107	9.43357
7.3	0.35	0.455071	6.82607	9.53857
7.32	0.35	0.462071	6.93107	9.64357
7.34	0.35	0.469071	7.03607	9.74857
7.36	0.35	0.476071	7.14107	9.85357
7.38	0.35	0.483071	7.24607	9.95857
7.4	0.35	0.490071	7.35107	10.0636
7.42	0.35	0.497071	7.45607	10.1686
7.44	0.35	0.504071	7.56107	10.2736
7.46	0.35	0.511071	7.66607	10.3786
7.48	0.35	0.518071	7.77107	10.4836
7.5	0.35	0.525071	7.87607	10.5886
7.52	0.35	0.532071	7.98107	10.6936
7.54	0.35	0.539071	8.08607	10.7986
7.56	0.35	0.546071	8.19107	10.9036
7.58	0.35	0.553071	8.29607	11.0086
7.6	0.35	0.560071	8.40107	11.1136
7.62	0.35	0.567071	8.50607	11.2186
7.64	0.35	0.574071	8.61107	11.3236
7.66	0.35	0.581071	8.71607	11.4286
7.68	0.35	0.588071	8.82107	11.5336
7.7	0.35	0.595071	8.92607	11.6386
7.72	0.35	0.602071	9.03107	11.7436
7.74	0.35	0.609071	9.13607	11.8486
7.76	0.35	0.616071	9.24107	11.9536
7.78	0.35	0.623071	9.34607	12.0586
7.8	0.35	0.630071	9.45107	12.1636
7.82	0.35	0.637071	9.55607	12.2686
7.84	0.35	0.644071	9.66107	12.3736
7.86	0.35	0.651071	9.76607	12.4786
7.88	0.35	0.658071	9.87107	12.5836
7.9	0.35	0.665071	9.97607	12.6886
7.92	0.35	0.672071	10.0811	12.7936
7.94	0.35	0.679071	10.1861	12.8986
7.96	0.35	0.686071	10.2911	13.0036
7.98	0.35	0.693071	10.3961	13.1086
8	0.35	0.700071	10.5011	13.2136

## Sheet: DATA 5
			MV =	7	l/min
			f =	10	bpm
			Ti =	2	s
			Raw =	2	cmH2O·s/l
			EL =	10	cmH2O/l
			ECW =	5	cmH2O/l
			PEEP =	5	cmH2O
			K1 =	1	cmH2O·s/l
			K2 =	5	cmH2O·(s/l)2
t	V'	V	Palv	Pao
s	l/s	l	cmH2O	cmH2O
0	0.35	0	5	6.6625
0.02	0.35	0.007	5.105	6.7675
0.04	0.35	0.014	5.21	6.8725
0.06	0.35	0.021	5.315	6.9775
0.08	0.35	0.028	5.42	7.0825
0.1	0.35	0.035	5.525	7.1875
0.12	0.35	0.042	5.63	7.2925
0.14	0.35	0.049	5.735	7.3975
0.16	0.35	0.056	5.84	7.5025
0.18	0.35	0.063	5.945	7.6075
0.2	0.35	0.07	6.05	7.7125
0.22	0.35	0.077	6.155	7.8175
0.24	0.35	0.084	6.26	7.9225
0.26	0.35	0.091	6.365	8.0275
0.28	0.35	0.098	6.47	8.1325
0.3	0.35	0.105	6.575	8.2375
0.32	0.35	0.112	6.68	8.3425
0.34	0.35	0.119	6.785	8.4475
0.36	0.35	0.126	6.89	8.5525
0.38	0.35	0.133	6.995	8.6575
0.4	0.35	0.14	7.1	8.7625
0.42	0.35	0.147	7.205	8.8675
0.44	0.35	0.154	7.31	8.9725
0.46	0.35	0.161	7.415	9.0775
0.48	0.35	0.168	7.52	9.1825
0.5	0.35	0.175	7.625	9.2875
0.52	0.35	0.182	7.73	9.3925
0.54	0.35	0.189	7.835	9.4975
0.56	0.35	0.196	7.94	9.6025
0.58	0.35	0.203	8.045	9.7075
0.6	0.35	0.21	8.15	9.8125
0.62	0.35	0.217	8.255	9.9175
0.64	0.35	0.224	8.36	10.0225
0.66	0.35	0.231	8.465	10.1275
0.68	0.35	0.238	8.57	10.2325
0.7	0.35	0.245	8.675	10.3375
0.72	0.35	0.252	8.78	10.4425
0.74	0.35	0.259	8.885	10.5475
0.76	0.35	0.266	8.99	10.6525
0.78	0.35	0.273	9.095	10.7575
0.8	0.35	0.28	9.2	10.8625
0.82	0.35	0.287	9.305	10.9675
0.84	0.35	0.294	9.41	11.0725
0.86	0.35	0.301	9.515	11.1775
0.88	0.35	0.308	9.62	11.2825
0.9	0.35	0.315	9.725	11.3875
0.92	0.35	0.322	9.83	11.4925
0.94	0.35	0.329	9.935	11.5975
0.96	0.35	0.336	10.04	11.7025
0.98	0.35	0.343	10.145	11.8075
1	0.35	0.35	10.25	11.9125
1.02	0.35	0.357	10.355	12.0175
1.04	0.35	0.364	10.46	12.1225
1.06	0.35	0.371	10.565	12.2275
1.08	0.35	0.378	10.67	12.3325
1.1	0.35	0.385	10.775	12.4375
1.12	0.35	0.392	10.88	12.5425
1.14	0.35	0.399	10.985	12.6475
1.16	0.35	0.406	11.09	12.7525
1.18	0.35	0.413	11.195	12.8575
1.2	0.35	0.42	11.3	12.9625
1.22	0.35	0.427	11.405	13.0675
1.24	0.35	0.434	11.51	13.1725
1.26	0.35	0.441	11.615	13.2775
1.28	0.35	0.448	11.72	13.3825
1.3	0.35	0.455	11.825	13.4875
1.32	0.35	0.462	11.93	13.5925
1.34	0.35	0.469	12.035	13.6975
1.36	0.35	0.476	12.14	13.8025
1.38	0.35	0.483	12.245	13.9075
1.4	0.35	0.49	12.35	14.0125
1.42	0.35	0.497	12.455	14.1175
1.44	0.35	0.504	12.56	14.2225
1.46	0.35	0.511	12.665	14.3275
1.48	0.35	0.518	12.77	14.4325
1.5	0.35	0.525	12.875	14.5375
1.52	0.35	0.532	12.98	14.6425
1.54	0.35	0.539	13.085	14.7475
1.56	0.35	0.546	13.19	14.8525
1.58	0.35	0.553	13.295	14.9575
1.6	0.35	0.56	13.4	15.0625
1.62	0.35	0.567	13.505	15.1675
1.64	0.35	0.574	13.61	15.2725
1.66	0.35	0.581	13.715	15.3775
1.68	0.35	0.588	13.82	15.4825
1.7	0.35	0.595	13.925	15.5875
1.72	0.35	0.602	14.03	15.6925
1.74	0.35	0.609	14.135	15.7975
1.76	0.35	0.616	14.24	15.9025
1.78	0.35	0.623	14.345	16.0075
1.8	0.35	0.63	14.45	16.1125
1.82	0.35	0.637	14.555	16.2175
1.84	0.35	0.644	14.66	16.3225
1.86	0.35	0.651	14.765	16.4275
1.88	0.35	0.658	14.87	16.5325
1.9	0.35	0.665	14.975	16.6375
1.92	0.35	0.672	15.08	16.7425
1.94	0.35	0.679	15.185	16.8475
1.96	0.35	0.686	15.29	16.9525
1.98	0.35	0.693	15.395	17.0575
2	0.35	0.7	15.5	17.1625
2.02	-1.17986	0.676403	15.146	5
2.04	-1.15575	0.653288	14.7993	5
2.06	-1.13173	0.630653	14.4598	5
2.08	-1.10782	0.608497	14.1275	5
2.1	-1.08401	0.586817	13.8023	5
2.12	-1.06031	0.565611	13.4842	5
2.14	-1.03672	0.544876	13.1731	5
2.16	-1.01325	0.524611	12.8692	5
2.18	-0.989893	0.504813	12.5722	5
2.2	-0.966662	0.48548	12.2822	5
2.22	-0.943556	0.466609	11.9991	5
2.24	-0.920582	0.448197	11.723	5
2.26	-0.897742	0.430243	11.4536	5
2.28	-0.875041	0.412742	11.1911	5
2.3	-0.852484	0.395692	10.9354	5
2.32	-0.830075	0.379091	10.6864	5
2.34	-0.80782	0.362934	10.444	5
2.36	-0.785724	0.34722	10.2083	5
2.38	-0.763792	0.331944	9.97916	5
2.4	-0.74203	0.317103	9.75655	5
2.42	-0.720443	0.302694	9.54042	5
2.44	-0.699039	0.288714	9.3307	5
2.46	-0.677822	0.275157	9.12736	5
2.48	-0.656801	0.262021	8.93032	5
2.5	-0.635981	0.249301	8.73952	5
2.52	-0.615369	0.236994	8.55491	5
2.54	-0.594974	0.225095	8.37642	5
2.56	-0.574803	0.213599	8.20398	5
2.58	-0.554864	0.202501	8.03752	5
2.6	-0.535165	0.191798	7.87697	5
2.62	-0.515715	0.181484	7.72225	5
2.64	-0.496523	0.171553	7.5733	5
2.66	-0.477597	0.162001	7.43002	5
2.68	-0.458948	0.152822	7.29233	5
2.7	-0.440584	0.144011	7.16016	5
2.72	-0.422517	0.13556	7.0334	5
2.74	-0.404755	0.127465	6.91198	5
2.76	-0.387309	0.119719	6.79578	5
2.78	-0.370191	0.112315	6.68473	5
2.8	-0.35341	0.105247	6.5787	5
2.82	-0.336977	0.0985074	6.47761	5
2.84	-0.320904	0.0920894	6.38134	5
2.86	-0.3052	0.0859854	6.28978	5
2.88	-0.289877	0.0801878	6.20282	5
2.9	-0.274946	0.0746889	6.12033	5
2.92	-0.260416	0.0694806	6.04221	5
2.94	-0.246298	0.0645546	5.96832	5
2.96	-0.232601	0.0599026	5.89854	5
2.98	-0.219334	0.0555159	5.83274	5
3	-0.206505	0.0513858	5.77079	5
3.02	-0.194123	0.0475034	5.71255	5
3.04	-0.182193	0.0438595	5.65789	5
3.06	-0.170721	0.0404451	5.60668	5
3.08	-0.159712	0.0372509	5.55876	5
3.1	-0.149169	0.0342675	5.51401	5
3.12	-0.139093	0.0314856	5.47228	5
3.14	-0.129484	0.028896	5.43344	5
3.16	-0.120342	0.0264891	5.39734	5
3.18	-0.111664	0.0242558	5.36384	5
3.2	-0.103444	0.0221869	5.3328	5
3.22	-0.0956776	0.0202734	5.3041	5
3.24	-0.0883556	0.0185063	5.27759	5
3.26	-0.0814692	0.0168769	5.25315	5
3.28	-0.0750075	0.0153767	5.23065	5
3.3	-0.0689582	0.0139976	5.20996	5
3.32	-0.063308	0.0127314	5.19097	5
3.34	-0.0580422	0.0115706	5.17356	5
3.36	-0.0531454	0.0105077	5.15761	5
3.38	-0.0486015	0.00953564	5.14303	5
3.4	-0.0443935	0.00864777	5.12972	5
3.42	-0.0405045	0.00783768	5.11757	5
3.44	-0.0369169	0.00709934	5.10649	5
3.46	-0.0336136	0.00642707	5.09641	5
3.48	-0.0305771	0.00581553	5.08723	5
3.5	-0.0277904	0.00525972	5.0789	5
3.52	-0.0252371	0.00475498	5.07132	5
3.54	-0.0229008	0.00429696	5.06445	5
3.56	-0.0207661	0.00388164	5.05822	5
3.58	-0.018818	0.00350528	5.05258	5
3.6	-0.0170423	0.00316443	5.04747	5
3.62	-0.0154256	0.00285592	5.04284	5
3.64	-0.013955	0.00257682	5.03865	5
3.66	-0.0126187	0.00232445	5.03487	5
3.68	-0.0114054	0.00209634	5.03145	5
3.7	-0.0103047	0.00189024	5.02835	5
3.72	-0.00930685	0.00170411	5.02556	5
3.74	-0.00840285	0.00153605	5.02304	5
3.76	-0.00758437	0.00138436	5.02077	5
3.78	-0.00684375	0.00124749	5.01871	5
3.8	-0.00617391	0.00112401	5.01686	5
3.82	-0.00556837	0.00101264	5.01519	5
3.84	-0.00502119	0.000912218	5.01368	5
3.86	-0.00452693	0.000821679	5.01233	5
3.88	-0.00408064	0.000740066	5.0111	5
3.9	-0.00367779	0.00066651	5.01	5
3.92	-0.00331425	0.000600226	5.009	5
3.94	-0.00298626	0.0005405	5.00811	5
3.96	-0.00269044	0.000486692	5.0073	5
3.98	-0.00242367	0.000438218	5.00657	5
4	-0.00218315	0.000394555	5.00592	5
4.02	-0.00196633	0.000355229	5.00533	5
4.04	-0.00177092	0.00031981	5.0048	5
4.06	-0.00159481	0.000287914	5.00432	5
4.08	-0.00143613	0.000259191	5.00389	5
4.1	-0.00129317	0.000233328	5.0035	5
4.12	-0.00116438	0.00021004	5.00315	5
4.14	-0.00104837	0.000189073	5.00284	5
4.16	-0.00094388	0.000170195	5.00255	5
4.18	-0.000849773	0.0001532	5.0023	5
4.2	-0.000765024	0.000137899	5.00207	5
4.22	-0.000688707	0.000124125	5.00186	5
4.24	-0.000619986	0.000111726	5.00168	5
4.26	-0.000558109	0.000100563	5.00151	5
4.28	-0.000502396	9.05155e-05	5.00136	5
4.3	-0.000452237	8.14707e-05	5.00122	5
4.32	-0.000407078	7.33292e-05	5.0011	5
4.34	-0.000366422	6.60008e-05	5.00099	5
4.36	-0.000329822	5.94043e-05	5.00089	5
4.38	-0.000296875	5.34668e-05	5.0008	5
4.4	-0.000267215	4.81225e-05	5.00072	5
4.42	-0.000240516	4.33122e-05	5.00065	5
4.44	-0.000216483	3.89825e-05	5.00058	5
4.46	-0.000194849	3.50855e-05	5.00053	5
4.48	-0.000175376	3.1578e-05	5.00047	5
4.5	-0.000157849	2.8421e-05	5.00043	5
4.52	-0.000142072	2.55796e-05	5.00038	5
4.54	-0.000127871	2.30222e-05	5.00035	5
4.56	-0.000115089	2.07204e-05	5.00031	5
4.58	-0.000103584	1.86487e-05	5.00028	5
4.6	-9.32292e-05	1.67841e-05	5.00025	5
4.62	-8.3909e-05	1.5106e-05	5.00023	5
4.64	-7.55203e-05	1.35956e-05	5.0002	5
4.66	-6.79701e-05	1.22362e-05	5.00018	5
4.68	-6.11746e-05	1.10127e-05	5.00017	5
4.7	-5.50583e-05	9.9115e-06	5.00015	5
4.72	-4.95534e-05	8.92043e-06	5.00013	5
4.74	-4.45989e-05	8.02846e-06	5.00012	5
4.76	-4.01396e-05	7.22567e-06	5.00011	5
4.78	-3.61262e-05	6.50314e-06	5.0001	5
4.8	-3.25139e-05	5.85286e-06	5.00009	5
4.82	-2.92629e-05	5.26761e-06	5.00008	5
4.84	-2.63369e-05	4.74087e-06	5.00007	5
4.86	-2.37034e-05	4.2668e-06	5.00006	5
4.88	-2.13332e-05	3.84014e-06	5.00006	5
4.9	-1.92001e-05	3.45613e-06	5.00005	5
4.92	-1.72802e-05	3.11053e-06	5.00005	5
4.94	-1.55522e-05	2.79949e-06	5.00004	5
4.96	-1.39971e-05	2.51954e-06	5.00004	5
4.98	-1.25975e-05	2.26759e-06	5.00003	5
5	-1.13378e-05	2.04084e-06	5.00003	5
5.02	-1.0204e-05	1.83676e-06	5.00003	5
5.04	-9.18365e-06	1.65309e-06	5.00002	5
5.06	-8.26531e-06	1.48778e-06	5.00002	5
5.08	-7.43881e-06	1.339e-06	5.00002	5
5.1	-6.69494e-06	1.2051e-06	5.00002	5
5.12	-6.02546e-06	1.0846e-06	5.00002	5
5.14	-5.42293e-06	9.76137e-07	5.00001	5
5.16	-4.88064e-06	8.78524e-07	5.00001	5
5.18	-4.39259e-06	7.90672e-07	5.00001	5
5.2	-3.95333e-06	7.11605e-07	5.00001	5
5.22	-3.55801e-06	6.40445e-07	5.00001	5
5.24	-3.20221e-06	5.76401e-07	5.00001	5
5.26	-2.88199e-06	5.18761e-07	5.00001	5
5.28	-2.5938e-06	4.66885e-07	5.00001	5
5.3	-2.33442e-06	4.20197e-07	5.00001	5
5.32	-2.10098e-06	3.78177e-07	5.00001	5
5.34	-1.89088e-06	3.4036e-07	5.00001	5
5.36	-1.70179e-06	3.06324e-07	5	5
5.38	-1.53162e-06	2.75692e-07	5	5
5.4	-1.37845e-06	2.48123e-07	5	5
5.42	-1.24061e-06	2.2331e-07	5	5
5.44	-1.11655e-06	2.00979e-07	5	5
5.46	-1.0049e-06	1.80881e-07	5	5
5.48	-9.04406e-07	1.62793e-07	5	5
5.5	-8.13965e-07	1.46514e-07	5	5
5.52	-7.32569e-07	1.31863e-07	5	5
5.54	-6.59312e-07	1.18676e-07	5	5
5.56	-5.93381e-07	1.06809e-07	5	5
5.58	-5.34043e-07	9.61279e-08	5	5
5.6	-4.80639e-07	8.65151e-08	5	5
5.62	-4.32575e-07	7.78636e-08	5	5
5.64	-3.89318e-07	7.00772e-08	5	5
5.66	-3.50386e-07	6.30695e-08	5	5
5.68	-3.15347e-07	5.67626e-08	5	5
5.7	-2.83813e-07	5.10863e-08	5	5
5.72	-2.55431e-07	4.59777e-08	5	5
5.74	-2.29888e-07	4.13799e-08	5	5
5.76	-2.069e-07	3.72419e-08	5	5
5.78	-1.8621e-07	3.35177e-08	5	5
5.8	-1.67589e-07	3.0166e-08	5	5
5.82	-1.5083e-07	2.71494e-08	5	5
5.84	-1.35747e-07	2.44344e-08	5	5
5.86	-1.22172e-07	2.1991e-08	5	5
5.88	-1.09955e-07	1.97919e-08	5	5
5.9	-9.89595e-08	1.78127e-08	5	5
5.92	-8.90635e-08	1.60314e-08	5	5
5.94	-8.01572e-08	1.44283e-08	5	5
5.96	-7.21414e-08	1.29855e-08	5	5
5.98	-6.49273e-08	1.16869e-08	5	5
6	-5.84346e-08	1.05182e-08	5	5
6.02	0.35	0.00700001	5.105	6.7675
6.04	0.35	0.014	5.21	6.8725
6.06	0.35	0.021	5.315	6.9775
6.08	0.35	0.028	5.42	7.0825
6.1	0.35	0.035	5.525	7.1875
6.12	0.35	0.042	5.63	7.2925
6.14	0.35	0.049	5.735	7.3975
6.16	0.35	0.056	5.84	7.5025
6.18	0.35	0.063	5.945	7.6075
6.2	0.35	0.07	6.05	7.7125
6.22	0.35	0.077	6.155	7.8175
6.24	0.35	0.084	6.26	7.9225
6.26	0.35	0.091	6.365	8.0275
6.28	0.35	0.098	6.47	8.1325
6.3	0.35	0.105	6.575	8.2375
6.32	0.35	0.112	6.68	8.3425
6.34	0.35	0.119	6.785	8.4475
6.36	0.35	0.126	6.89	8.5525
6.38	0.35	0.133	6.995	8.6575
6.4	0.35	0.14	7.1	8.7625
6.42	0.35	0.147	7.205	8.8675
6.44	0.35	0.154	7.31	8.9725
6.46	0.35	0.161	7.415	9.0775
6.48	0.35	0.168	7.52	9.1825
6.5	0.35	0.175	7.625	9.2875
6.52	0.35	0.182	7.73	9.3925
6.54	0.35	0.189	7.835	9.4975
6.56	0.35	0.196	7.94	9.6025
6.58	0.35	0.203	8.045	9.7075
6.6	0.35	0.21	8.15	9.8125
6.62	0.35	0.217	8.255	9.9175
6.64	0.35	0.224	8.36	10.0225
6.66	0.35	0.231	8.465	10.1275
6.68	0.35	0.238	8.57	10.2325
6.7	0.35	0.245	8.675	10.3375
6.72	0.35	0.252	8.78	10.4425
6.74	0.35	0.259	8.885	10.5475
6.76	0.35	0.266	8.99	10.6525
6.78	0.35	0.273	9.095	10.7575
6.8	0.35	0.28	9.2	10.8625
6.82	0.35	0.287	9.305	10.9675
6.84	0.35	0.294	9.41	11.0725
6.86	0.35	0.301	9.515	11.1775
6.88	0.35	0.308	9.62	11.2825
6.9	0.35	0.315	9.725	11.3875
6.92	0.35	0.322	9.83	11.4925
6.94	0.35	0.329	9.935	11.5975
6.96	0.35	0.336	10.04	11.7025
6.98	0.35	0.343	10.145	11.8075
7	0.35	0.35	10.25	11.9125
7.02	0.35	0.357	10.355	12.0175
7.04	0.35	0.364	10.46	12.1225
7.06	0.35	0.371	10.565	12.2275
7.08	0.35	0.378	10.67	12.3325
7.1	0.35	0.385	10.775	12.4375
7.12	0.35	0.392	10.88	12.5425
7.14	0.35	0.399	10.985	12.6475
7.16	0.35	0.406	11.09	12.7525
7.18	0.35	0.413	11.195	12.8575
7.2	0.35	0.42	11.3	12.9625
7.22	0.35	0.427	11.405	13.0675
7.24	0.35	0.434	11.51	13.1725
7.26	0.35	0.441	11.615	13.2775
7.28	0.35	0.448	11.72	13.3825
7.3	0.35	0.455	11.825	13.4875
7.32	0.35	0.462	11.93	13.5925
7.34	0.35	0.469	12.035	13.6975
7.36	0.35	0.476	12.14	13.8025
7.38	0.35	0.483	12.245	13.9075
7.4	0.35	0.49	12.35	14.0125
7.42	0.35	0.497	12.455	14.1175
7.44	0.35	0.504	12.56	14.2225
7.46	0.35	0.511	12.665	14.3275
7.48	0.35	0.518	12.77	14.4325
7.5	0.35	0.525	12.875	14.5375
7.52	0.35	0.532	12.98	14.6425
7.54	0.35	0.539	13.085	14.7475
7.56	0.35	0.546	13.19	14.8525
7.58	0.35	0.553	13.295	14.9575
7.6	0.35	0.56	13.4	15.0625
7.62	0.35	0.567	13.505	15.1675
7.64	0.35	0.574	13.61	15.2725
7.66	0.35	0.581	13.715	15.3775
7.68	0.35	0.588	13.82	15.4825
7.7	0.35	0.595	13.925	15.5875
7.72	0.35	0.602	14.03	15.6925
7.74	0.35	0.609	14.135	15.7975
7.76	0.35	0.616	14.24	15.9025
7.78	0.35	0.623	14.345	16.0075
7.8	0.35	0.63	14.45	16.1125
7.82	0.35	0.637	14.555	16.2175
7.84	0.35	0.644	14.66	16.3225
7.86	0.35	0.651	14.765	16.4275
7.88	0.35	0.658	14.87	16.5325
7.9	0.35	0.665	14.975	16.6375
7.92	0.35	0.672	15.08	16.7425
7.94	0.35	0.679	15.185	16.8475
7.96	0.35	0.686	15.29	16.9525
7.98	0.35	0.693	15.395	17.0575
8	0.35	0.7	15.5	17.1625

## Sheet: DATA 6
								VM =	7	l/min
								f =	10	rpm
								Ti =	2	s
								Raw =	5	cmH2O·s/l
								EL =	10	cmH2O/l
								ECW =	5	cmH2O/l
								PEEP =	3	cmH2O
								K1 =	1	cmH2O·s/l
								K2 =	5	cmH2O·s/l
t	V'	V	Palv	Pao
s	l/s	l	cmH2O	cmH2O
0	0.35	0	3	5.7125
0.02	0.35	0.007	3.105	5.8175
0.04	0.35	0.014	3.21	5.9225
0.06	0.35	0.021	3.315	6.0275
0.08	0.35	0.028	3.42	6.1325
0.1	0.35	0.035	3.525	6.2375
0.12	0.35	0.042	3.63	6.3425
0.14	0.35	0.049	3.735	6.4475
0.16	0.35	0.056	3.84	6.5525
0.18	0.35	0.063	3.945	6.6575
0.2	0.35	0.07	4.05	6.7625
0.22	0.35	0.077	4.155	6.8675
0.24	0.35	0.084	4.26	6.9725
0.26	0.35	0.091	4.365	7.0775
0.28	0.35	0.098	4.47	7.1825
0.3	0.35	0.105	4.575	7.2875
0.32	0.35	0.112	4.68	7.3925
0.34	0.35	0.119	4.785	7.4975
0.36	0.35	0.126	4.89	7.6025
0.38	0.35	0.133	4.995	7.7075
0.4	0.35	0.14	5.1	7.8125
0.42	0.35	0.147	5.205	7.9175
0.44	0.35	0.154	5.31	8.0225
0.46	0.35	0.161	5.415	8.1275
0.48	0.35	0.168	5.52	8.2325
0.5	0.35	0.175	5.625	8.3375
0.52	0.35	0.182	5.73	8.4425
0.54	0.35	0.189	5.835	8.5475
0.56	0.35	0.196	5.94	8.6525
0.58	0.35	0.203	6.045	8.7575
0.6	0.35	0.21	6.15	8.8625
0.62	0.35	0.217	6.255	8.9675
0.64	0.35	0.224	6.36	9.0725
0.66	0.35	0.231	6.465	9.1775
0.68	0.35	0.238	6.57	9.2825
0.7	0.35	0.245	6.675	9.3875
0.72	0.35	0.252	6.78	9.4925
0.74	0.35	0.259	6.885	9.5975
0.76	0.35	0.266	6.99	9.7025
0.78	0.35	0.273	7.095	9.8075
0.8	0.35	0.28	7.2	9.9125
0.82	0.35	0.287	7.305	10.0175
0.84	0.35	0.294	7.41	10.1225
0.86	0.35	0.301	7.515	10.2275
0.88	0.35	0.308	7.62	10.3325
0.9	0.35	0.315	7.725	10.4375
0.92	0.35	0.322	7.83	10.5425
0.94	0.35	0.329	7.935	10.6475
0.96	0.35	0.336	8.04	10.7525
0.98	0.35	0.343	8.145	10.8575
1	0.35	0.35	8.25	10.9625
1.02	0.35	0.357	8.355	11.0675
1.04	0.35	0.364	8.46	11.1725
1.06	0.35	0.371	8.565	11.2775
1.08	0.35	0.378	8.67	11.3825
1.1	0.35	0.385	8.775	11.4875
1.12	0.35	0.392	8.88	11.5925
1.14	0.35	0.399	8.985	11.6975
1.16	0.35	0.406	9.09	11.8025
1.18	0.35	0.413	9.195	11.9075
1.2	0.35	0.42	9.3	12.0125
1.22	0.35	0.427	9.405	12.1175
1.24	0.35	0.434	9.51	12.2225
1.26	0.35	0.441	9.615	12.3275
1.28	0.35	0.448	9.72	12.4325
1.3	0.35	0.455	9.825	12.5375
1.32	0.35	0.462	9.93	12.6425
1.34	0.35	0.469	10.035	12.7475
1.36	0.35	0.476	10.14	12.8525
1.38	0.35	0.483	10.245	12.9575
1.4	0.35	0.49	10.35	13.0625
1.42	0.35	0.497	10.455	13.1675
1.44	0.35	0.504	10.56	13.2725
1.46	0.35	0.511	10.665	13.3775
1.48	0.35	0.518	10.77	13.4825
1.5	0.35	0.525	10.875	13.5875
1.52	0.35	0.532	10.98	13.6925
1.54	0.35	0.539	11.085	13.7975
1.56	0.35	0.546	11.19	13.9025
1.58	0.35	0.553	11.295	14.0075
1.6	0.35	0.56	11.4	14.1125
1.62	0.35	0.567	11.505	14.2175
1.64	0.35	0.574	11.61	14.3225
1.66	0.35	0.581	11.715	14.4275
1.68	0.35	0.588	11.82	14.5325
1.7	0.35	0.595	11.925	14.6375
1.72	0.35	0.602	12.03	14.7425
1.74	0.35	0.609	12.135	14.8475
1.76	0.35	0.616	12.24	14.9525
1.78	0.35	0.623	12.345	15.0575
1.8	0.35	0.63	12.45	15.1625
1.82	0.35	0.637	12.555	15.2675
1.84	0.35	0.644	12.66	15.3725
1.86	0.35	0.651	12.765	15.4775
1.88	0.35	0.658	12.87	15.5825
1.9	0.35	0.665	12.975	15.6875
1.92	0.35	0.672	13.08	15.7925
1.94	0.35	0.679	13.185	15.8975
1.96	0.35	0.686	13.29	16.0025
1.98	0.35	0.693	13.395	16.1075
2	0.35	0.7	13.5	16.2125
2.02	0	0.7	13.5	13.5
2.04	0	0.7	13.5	13.5
2.06	0	0.7	13.5	13.5
2.08	0	0.7	13.5	13.5
2.1	0	0.7	13.5	13.5
2.12	0	0.7	13.5	13.5
2.14	0	0.7	13.5	13.5
2.16	0	0.7	13.5	13.5
2.18	0	0.7	13.5	13.5
2.2	0	0.7	13.5	13.5
2.22	0	0.7	13.5	13.5
2.24	0	0.7	13.5	13.5
2.26	0	0.7	13.5	13.5
2.28	0	0.7	13.5	13.5
2.3	0	0.7	13.5	13.5
2.32	0	0.7	13.5	13.5
2.34	0	0.7	13.5	13.5
2.36	0	0.7	13.5	13.5
2.38	0	0.7	13.5	13.5
2.4	0	0.7	13.5	13.5
2.42	0	0.7	13.5	13.5
2.44	0	0.7	13.5	13.5
2.46	0	0.7	13.5	13.5
2.48	0	0.7	13.5	13.5
2.5	0	0.7	13.5	13.5
2.52	0	0.7	13.5	13.5
2.54	0	0.7	13.5	13.5
2.56	0	0.7	13.5	13.5
2.58	0	0.7	13.5	13.5
2.6	0	0.7	13.5	13.5
2.62	0	0.7	13.5	13.5
2.64	0	0.7	13.5	13.5
2.66	0	0.7	13.5	13.5
2.68	0	0.7	13.5	13.5
2.7	0	0.7	13.5	13.5
2.72	0	0.7	13.5	13.5
2.74	0	0.7	13.5	13.5
2.76	0	0.7	13.5	13.5
2.78	0	0.7	13.5	13.5
2.8	0	0.7	13.5	13.5
2.82	0	0.7	13.5	13.5
2.84	0	0.7	13.5	13.5
2.86	0	0.7	13.5	13.5
2.88	0	0.7	13.5	13.5
2.9	0	0.7	13.5	13.5
2.92	0	0.7	13.5	13.5
2.94	0	0.7	13.5	13.5
2.96	0	0.7	13.5	13.5
2.98	0	0.7	13.5	13.5
3	0	0.7	13.5	13.5
3.02	-0.968436	0.680631	13.2095	3
3.04	-0.949802	0.661635	12.9245	3
3.06	-0.931306	0.643009	12.6451	3
3.08	-0.912951	0.62475	12.3713	3
3.1	-0.894738	0.606855	12.1028	3
3.12	-0.876672	0.589322	11.8398	3
3.14	-0.858753	0.572147	11.5822	3
3.16	-0.840984	0.555327	11.3299	3
3.18	-0.823368	0.53886	11.0829	3
3.2	-0.805907	0.522742	10.8411	3
3.22	-0.788603	0.50697	10.6045	3
3.24	-0.77146	0.49154	10.3731	3
3.26	-0.75448	0.476451	10.1468	3
3.28	-0.737665	0.461698	9.92546	3
3.3	-0.721018	0.447277	9.70916	3
3.32	-0.704541	0.433186	9.4978	3
3.34	-0.688237	0.419422	9.29132	3
3.36	-0.672109	0.405979	9.08969	3
3.38	-0.656159	0.392856	8.89284	3
3.4	-0.640389	0.380048	8.70073	3
3.42	-0.624803	0.367552	8.51329	3
3.44	-0.609402	0.355364	8.33047	3
3.46	-0.59419	0.343481	8.15221	3
3.48	-0.579169	0.331897	7.97846	3
3.5	-0.56434	0.32061	7.80916	3
3.52	-0.549708	0.309616	7.64424	3
3.54	-0.535274	0.298911	7.48366	3
3.56	-0.52104	0.28849	7.32735	3
3.58	-0.507008	0.27835	7.17525	3
3.6	-0.493182	0.268486	7.02729	3
3.62	-0.479563	0.258895	6.88342	3
3.64	-0.466153	0.249572	6.74358	3
3.66	-0.452955	0.240513	6.60769	3
3.68	-0.439969	0.231713	6.4757	3
3.7	-0.427199	0.223169	6.34754	3
3.72	-0.414646	0.214876	6.22315	3
3.74	-0.402311	0.20683	6.10245	3
3.76	-0.390197	0.199026	5.98539	3
3.78	-0.378303	0.19146	5.8719	3
3.8	-0.366633	0.184128	5.76191	3
3.82	-0.355187	0.177024	5.65536	3
3.84	-0.343965	0.170145	5.55217	3
3.86	-0.33297	0.163485	5.45228	3
3.88	-0.322201	0.157041	5.35562	3
3.9	-0.311659	0.150808	5.26212	3
3.92	-0.301345	0.144781	5.17172	3
3.94	-0.291259	0.138956	5.08434	3
3.96	-0.2814	0.133328	4.99992	3
3.98	-0.27177	0.127892	4.91839	3
4	-0.262367	0.122645	4.83968	3
4.02	-0.253191	0.117581	4.76372	3
4.04	-0.244241	0.112696	4.69045	3
4.06	-0.235517	0.107986	4.61979	3
4.08	-0.227017	0.103446	4.55169	3
4.1	-0.218741	0.0990709	4.48606	3
4.12	-0.210686	0.0948572	4.42286	3
4.14	-0.202852	0.0908002	4.362	3
4.16	-0.195236	0.0868955	4.30343	3
4.18	-0.187836	0.0831387	4.24708	3
4.2	-0.180651	0.0795257	4.19289	3
4.22	-0.173677	0.0760522	4.14078	3
4.24	-0.166913	0.0727139	4.09071	3
4.26	-0.160356	0.0695068	4.0426	3
4.28	-0.154003	0.0664267	3.9964	3
4.3	-0.14785	0.0634697	3.95205	3
4.32	-0.141896	0.0606318	3.90948	3
4.34	-0.136135	0.0579091	3.86864	3
4.36	-0.130566	0.0552978	3.82947	3
4.38	-0.125185	0.0527941	3.79191	3
4.4	-0.119988	0.0503943	3.75591	3
4.42	-0.114971	0.0480949	3.72142	3
4.44	-0.11013	0.0458923	3.68838	3
4.46	-0.105462	0.0437831	3.65675	3
4.48	-0.100963	0.0417638	3.62646	3
4.5	-0.0966286	0.0398312	3.59747	3
4.52	-0.0924548	0.0379821	3.56973	3
4.54	-0.0884376	0.0362134	3.5432	3
4.56	-0.0845729	0.0345219	3.51783	3
4.58	-0.0808566	0.0329048	3.49357	3
4.6	-0.0772845	0.0313591	3.47039	3
4.62	-0.0738526	0.0298821	3.44823	3
4.64	-0.0705566	0.0284709	3.42706	3
4.66	-0.0673925	0.0271231	3.40685	3
4.68	-0.0643562	0.0258359	3.38754	3
4.7	-0.0614437	0.0246071	3.36911	3
4.72	-0.058651	0.0234341	3.35151	3
4.74	-0.0559742	0.0223146	3.33472	3
4.76	-0.0534093	0.0212464	3.3187	3
4.78	-0.0509525	0.0202273	3.30341	3
4.8	-0.0486	0.0192553	3.28883	3
4.82	-0.0463482	0.0183284	3.27493	3
4.84	-0.0441934	0.0174445	3.26167	3
4.86	-0.042132	0.0166019	3.24903	3
4.88	-0.0401606	0.0157987	3.23698	3
4.9	-0.0382758	0.0150331	3.2255	3
4.92	-0.0364742	0.0143037	3.21455	3
4.94	-0.0347527	0.0136086	3.20413	3
4.96	-0.033108	0.0129464	3.1942	3
4.98	-0.0315373	0.0123157	3.18474	3
5	-0.0300374	0.0117149	3.17572	3
5.02	-0.0286055	0.0111428	3.16714	3
5.04	-0.0272388	0.0105981	3.15897	3
5.06	-0.0259346	0.0100794	3.15119	3
5.08	-0.0246904	0.00958556	3.14378	3
5.1	-0.0235035	0.00911549	3.13673	3
5.12	-0.0223716	0.00866806	3.13002	3
5.14	-0.0212923	0.00824221	3.12363	3
5.16	-0.0202634	0.00783694	3.11755	3
5.18	-0.0192825	0.00745129	3.11177	3
5.2	-0.0183477	0.00708434	3.10627	3
5.22	-0.0174569	0.0067352	3.10103	3
5.24	-0.0166081	0.00640304	3.09605	3
5.26	-0.0157996	0.00608705	3.09131	3
5.28	-0.0150294	0.00578646	3.0868	3
5.3	-0.0142958	0.00550054	3.08251	3
5.32	-0.0135973	0.0052286	3.07843	3
5.34	-0.0129321	0.00496995	3.07455	3
5.36	-0.0122988	0.00472398	3.07086	3
5.38	-0.0116959	0.00449006	3.06735	3
5.4	-0.0111221	0.00426762	3.06401	3
5.42	-0.0105758	0.0040561	3.06084	3
5.44	-0.010056	0.00385498	3.05782	3
5.46	-0.00956127	0.00366376	3.05496	3
5.48	-0.00909052	0.00348195	3.05223	3
5.5	-0.00864262	0.00330909	3.04964	3
5.52	-0.00821647	0.00314476	3.04717	3
5.54	-0.00781106	0.00298854	3.04483	3
5.56	-0.00742541	0.00284003	3.0426	3
5.58	-0.00705857	0.00269886	3.04048	3
5.6	-0.00670964	0.00256467	3.03847	3
5.62	-0.00637778	0.00243711	3.03656	3
5.64	-0.00606216	0.00231587	3.03474	3
5.66	-0.00576201	0.00220063	3.03301	3
5.68	-0.00547658	0.0020911	3.03137	3
5.7	-0.00520517	0.001987	3.0298	3
5.72	-0.00494709	0.00188805	3.02832	3
5.74	-0.00470171	0.00179402	3.02691	3
5.76	-0.00446841	0.00170465	3.02557	3
5.78	-0.0042466	0.00161972	3.0243	3
5.8	-0.00403573	0.001539	3.02309	3
5.82	-0.00383525	0.0014623	3.02193	3
5.84	-0.00364468	0.00138941	3.02084	3
5.86	-0.00346352	0.00132014	3.0198	3
5.88	-0.00329131	0.00125431	3.01881	3
5.9	-0.00312762	0.00119176	3.01788	3
5.92	-0.00297203	0.00113232	3.01698	3
5.94	-0.00282414	0.00107583	3.01614	3
5.96	-0.00268358	0.00102216	3.01533	3
5.98	-0.00254999	0.000971162	3.01457	3
6	-0.00242301	0.000922702	3.01384	3
6.02	-0.00230234	0.000876655	3.01315	3
6.04	-0.00218765	0.000832902	3.01249	3
6.06	-0.00207865	0.000791329	3.01187	3
6.08	-0.00197507	0.000751828	3.01128	3
6.1	-0.00187663	0.000714295	3.01071	3
6.12	-0.00178309	0.000678633	3.01018	3
6.14	-0.00169419	0.000644749	3.00967	3
6.16	-0.00160971	0.000612555	3.00919	3
6.18	-0.00152944	0.000581966	3.00873	3
6.2	-0.00145316	0.000552903	3.00829	3
6.22	-0.00138067	0.00052529	3.00788	3
6.24	-0.00131179	0.000499054	3.00749	3
6.26	-0.00124634	0.000474127	3.00711	3
6.28	-0.00118415	0.000450444	3.00676	3
6.3	-0.00112506	0.000427943	3.00642	3
6.32	-0.00106891	0.000406565	3.0061	3
6.34	-0.00101555	0.000386254	3.00579	3
6.36	-0.000964859	0.000366957	3.0055	3
6.38	-0.000916692	0.000348623	3.00523	3
6.4	-0.000870925	0.000331204	3.00497	3
6.42	-0.000827441	0.000314656	3.00472	3
6.44	-0.000786124	0.000298933	3.00448	3
6.46	-0.000746868	0.000283996	3.00426	3
6.48	-0.00070957	0.000269804	3.00405	3
6.5	-0.000674132	0.000256322	3.00384	3
6.52	-0.000640463	0.000243512	3.00365	3
6.54	-0.000608473	0.000231343	3.00347	3
6.56	-0.000578079	0.000219781	3.0033	3
6.58	-0.000549202	0.000208797	3.00313	3
6.6	-0.000521767	0.000198362	3.00298	3
6.62	-0.0004957	0.000188448	3.00283	3
6.64	-0.000470935	0.000179029	3.00269	3
6.66	-0.000447407	0.000170081	3.00255	3
6.68	-0.000425053	0.00016158	3.00242	3
6.7	-0.000403815	0.000153504	3.0023	3
6.72	-0.000383637	0.000145831	3.00219	3
6.74	-0.000364467	0.000138542	3.00208	3
6.76	-0.000346255	0.000131617	3.00197	3
6.78	-0.000328952	0.000125038	3.00188	3
6.8	-0.000312513	0.000118787	3.00178	3
6.82	-0.000296895	0.00011285	3.00169	3
6.84	-0.000282058	0.000107208	3.00161	3
6.86	-0.000267961	0.000101849	3.00153	3
6.88	-0.000254569	9.67578e-05	3.00145	3
6.9	-0.000241846	9.19209e-05	3.00138	3
6.92	-0.000229758	8.73257e-05	3.00131	3
6.94	-0.000218275	8.29602e-05	3.00124	3
6.96	-0.000207365	7.88129e-05	3.00118	3
6.98	-0.000197	7.48729e-05	3.00112	3
7	-0.000187153	7.11298e-05	3.00107	3
7.02	0.35	0.00707113	3.10607	5.81857
7.04	0.35	0.0140711	3.21107	5.92357
7.06	0.35	0.0210711	3.31607	6.02857
7.08	0.35	0.0280711	3.42107	6.13357
7.1	0.35	0.0350711	3.52607	6.23857
7.12	0.35	0.0420711	3.63107	6.34357
7.14	0.35	0.0490711	3.73607	6.44857
7.16	0.35	0.0560711	3.84107	6.55357
7.18	0.35	0.0630711	3.94607	6.65857
7.2	0.35	0.0700711	4.05107	6.76357
7.22	0.35	0.0770711	4.15607	6.86857
7.24	0.35	0.0840711	4.26107	6.97357
7.26	0.35	0.0910711	4.36607	7.07857
7.28	0.35	0.0980711	4.47107	7.18357
7.3	0.35	0.105071	4.57607	7.28857
7.32	0.35	0.112071	4.68107	7.39357
7.34	0.35	0.119071	4.78607	7.49857
7.36	0.35	0.126071	4.89107	7.60357
7.38	0.35	0.133071	4.99607	7.70857
7.4	0.35	0.140071	5.10107	7.81357
7.42	0.35	0.147071	5.20607	7.91857
7.44	0.35	0.154071	5.31107	8.02357
7.46	0.35	0.161071	5.41607	8.12857
7.48	0.35	0.168071	5.52107	8.23357
7.5	0.35	0.175071	5.62607	8.33857
7.52	0.35	0.182071	5.73107	8.44357
7.54	0.35	0.189071	5.83607	8.54857
7.56	0.35	0.196071	5.94107	8.65357
7.58	0.35	0.203071	6.04607	8.75857
7.6	0.35	0.210071	6.15107	8.86357
7.62	0.35	0.217071	6.25607	8.96857
7.64	0.35	0.224071	6.36107	9.07357
7.66	0.35	0.231071	6.46607	9.17857
7.68	0.35	0.238071	6.57107	9.28357
7.7	0.35	0.245071	6.67607	9.38857
7.72	0.35	0.252071	6.78107	9.49357
7.74	0.35	0.259071	6.88607	9.59857
7.76	0.35	0.266071	6.99107	9.70357
7.78	0.35	0.273071	7.09607	9.80857
7.8	0.35	0.280071	7.20107	9.91357
7.82	0.35	0.287071	7.30607	10.0186
7.84	0.35	0.294071	7.41107	10.1236
7.86	0.35	0.301071	7.51607	10.2286
7.88	0.35	0.308071	7.62107	10.3336
7.9	0.35	0.315071	7.72607	10.4386
7.92	0.35	0.322071	7.83107	10.5436
7.94	0.35	0.329071	7.93607	10.6486
7.96	0.35	0.336071	8.04107	10.7536
7.98	0.35	0.343071	8.14607	10.8586
8	0.35	0.350071	8.25107	10.9636
8.02	0.35	0.357071	8.35607	11.0686
8.04	0.35	0.364071	8.46107	11.1736
8.06	0.35	0.371071	8.56607	11.2786
8.08	0.35	0.378071	8.67107	11.3836
8.1	0.35	0.385071	8.77607	11.4886
8.12	0.35	0.392071	8.88107	11.5936
8.14	0.35	0.399071	8.98607	11.6986
8.16	0.35	0.406071	9.09107	11.8036
8.18	0.35	0.413071	9.19607	11.9086
8.2	0.35	0.420071	9.30107	12.0136
8.22	0.35	0.427071	9.40607	12.1186
8.24	0.35	0.434071	9.51107	12.2236
8.26	0.35	0.441071	9.61607	12.3286
8.28	0.35	0.448071	9.72107	12.4336
8.3	0.35	0.455071	9.82607	12.5386
8.32	0.35	0.462071	9.93107	12.6436
8.34	0.35	0.469071	10.0361	12.7486
8.36	0.35	0.476071	10.1411	12.8536
8.38	0.35	0.483071	10.2461	12.9586
8.4	0.35	0.490071	10.3511	13.0636
8.42	0.35	0.497071	10.4561	13.1686
8.44	0.35	0.504071	10.5611	13.2736
8.46	0.35	0.511071	10.6661	13.3786
8.48	0.35	0.518071	10.7711	13.4836
8.5	0.35	0.525071	10.8761	13.5886
8.52	0.35	0.532071	10.9811	13.6936
8.54	0.35	0.539071	11.0861	13.7986
8.56	0.35	0.546071	11.1911	13.9036
8.58	0.35	0.553071	11.2961	14.0086
8.6	0.35	0.560071	11.4011	14.1136
8.62	0.35	0.567071	11.5061	14.2186
8.64	0.35	0.574071	11.6111	14.3236
8.66	0.35	0.581071	11.7161	14.4286
8.68	0.35	0.588071	11.8211	14.5336
8.7	0.35	0.595071	11.9261	14.6386
8.72	0.35	0.602071	12.0311	14.7436
8.74	0.35	0.609071	12.1361	14.8486
8.76	0.35	0.616071	12.2411	14.9536
8.78	0.35	0.623071	12.3461	15.0586
8.8	0.35	0.630071	12.4511	15.1636
8.82	0.35	0.637071	12.5561	15.2686
8.84	0.35	0.644071	12.6611	15.3736
8.86	0.35	0.651071	12.7661	15.4786
8.88	0.35	0.658071	12.8711	15.5836
8.9	0.35	0.665071	12.9761	15.6886
8.92	0.35	0.672071	13.0811	15.7936
8.94	0.35	0.679071	13.1861	15.8986
8.96	0.35	0.686071	13.2911	16.0036
8.98	0.35	0.693071	13.3961	16.1086
9	0.35	0.700071	13.5011	16.2136
