# Supplementary material
Source: HighWire-hosted journal article supplement (https://breathe.ersjournals.com/content/17/2/210012)
Supplement: inline-supplementary-material-3 [file inline-supplementary-material-3.xlsx]

## Sheet: DATA 1
								Raw =	2	cmH2O·s/l
								EL =	5	cmH2O/l
								ECW =	5	cmH2O/l
								PL(FRC) =	5	cmH2O
t	V'	V	Palv	Ppl	PL	Pmus
s	l/s	l	cmH2O	cmH2O	cmH2O	cmH2O
0	0	0	0	-5	5	0
0.02	0.01	0.0002	-0.02	-5.021	5.001	-0.022
0.04	0.0221374	0.000642749	-0.0442749	-5.04749	5.00321	-0.0507024
0.06	0.0475374	0.0015935	-0.0950749	-5.10304	5.00797	-0.11101
0.08	0.0704374	0.00300225	-0.140875	-5.15589	5.01501	-0.170897
0.1	0.0774374	0.004551	-0.154875	-5.17763	5.02275	-0.200385
0.12	0.0866374	0.00628374	-0.173275	-5.20469	5.03142	-0.236112
0.14	0.102637	0.00833649	-0.205275	-5.24696	5.04168	-0.28864
0.16	0.121037	0.0107572	-0.242075	-5.29586	5.05379	-0.349647
0.18	0.137237	0.013502	-0.274475	-5.34198	5.06751	-0.409495
0.2	0.148737	0.0164767	-0.297475	-5.37986	5.08238	-0.462242
0.22	0.162537	0.0197275	-0.325075	-5.42371	5.09864	-0.52235
0.24	0.190137	0.0235302	-0.380275	-5.49793	5.11765	-0.615577
0.26	0.229237	0.028115	-0.458475	-5.59905	5.14057	-0.739625
0.28	0.268337	0.0334817	-0.536675	-5.70408	5.16741	-0.871492
0.3	0.291337	0.0393085	-0.582675	-5.77922	5.19654	-0.97576
0.32	0.300537	0.0453192	-0.601075	-5.82767	5.2266	-1.05427
0.34	0.307537	0.05147	-0.615075	-5.87242	5.25735	-1.12977
0.36	0.319037	0.0578507	-0.638075	-5.92733	5.28925	-1.21658
0.38	0.316637	0.0641835	-0.633275	-5.95419	5.32092	-1.27511
0.4	0.298337	0.0701502	-0.596675	-5.94743	5.35075	-1.29818
0.42	0.268337	0.075517	-0.536675	-5.91426	5.37758	-1.29184
0.44	0.240737	0.0803317	-0.481475	-5.88313	5.40166	-1.28479
0.46	0.229237	0.0849165	-0.458475	-5.88306	5.42458	-1.30764
0.48	0.231537	0.0895472	-0.463075	-5.91081	5.44774	-1.35855
0.5	0.245337	0.094454	-0.490675	-5.96294	5.47227	-1.43521
0.52	0.263737	0.0997287	-0.527475	-6.02612	5.49864	-1.52476
0.54	0.282237	0.105373	-0.564475	-6.09134	5.52687	-1.61821
0.56	0.300537	0.111384	-0.601075	-6.158	5.55692	-1.71492
0.58	0.316637	0.117717	-0.633275	-6.22186	5.58858	-1.81044
0.6	0.351137	0.12474	-0.702275	-6.32597	5.6237	-1.94967
0.62	0.383437	0.132408	-0.766875	-6.42892	5.66204	-2.09096
0.64	0.399537	0.140399	-0.799075	-6.50107	5.702	-2.20307
0.66	0.392637	0.148252	-0.785275	-6.52653	5.74126	-2.26779
0.68	0.383437	0.155921	-0.766875	-6.54648	5.7796	-2.32608
0.7	0.388037	0.163681	-0.776075	-6.59448	5.81841	-2.41289
0.72	0.417937	0.17204	-0.835875	-6.69608	5.8602	-2.55628
0.74	0.445537	0.180951	-0.891075	-6.79583	5.90475	-2.70058
0.76	0.459337	0.190138	-0.918675	-6.86936	5.95069	-2.82005
0.78	0.461637	0.19937	-0.923275	-6.92013	5.99685	-2.91698
0.8	0.459337	0.208557	-0.918675	-6.96146	6.04279	-3.00425
0.82	0.450137	0.21756	-0.900275	-6.98807	6.0878	-3.07587
0.84	0.429437	0.226149	-0.858875	-6.98962	6.13074	-3.12036
0.86	0.415637	0.234461	-0.831275	-7.00358	6.17231	-3.17589
0.88	0.413337	0.242728	-0.826675	-7.04032	6.21364	-3.25396
0.9	0.411037	0.250949	-0.822075	-7.07682	6.25474	-3.33156
0.92	0.406437	0.259078	-0.812875	-7.10826	6.29539	-3.40365
0.94	0.401837	0.267114	-0.803675	-7.13925	6.33557	-3.47482
0.96	0.397237	0.275059	-0.794475	-7.16977	6.3753	-3.54507
0.98	0.392637	0.282912	-0.785275	-7.19983	6.41456	-3.61439
1	0.381137	0.290535	-0.762275	-7.21495	6.45267	-3.66762
1.02	0.374237	0.298019	-0.748475	-7.23857	6.4901	-3.72867
1.04	0.376537	0.30555	-0.753075	-7.28083	6.52775	-3.80858
1.06	0.383437	0.313219	-0.766875	-7.33297	6.56609	-3.89906
1.08	0.388037	0.32098	-0.776075	-7.38097	6.6049	-3.98587
1.1	0.383437	0.328648	-0.766875	-7.41012	6.64324	-4.05336
1.12	0.376537	0.336179	-0.753075	-7.43397	6.6809	-4.11487
1.14	0.371937	0.343618	-0.743875	-7.46196	6.71809	-4.18005
1.16	0.371937	0.351057	-0.743875	-7.49916	6.75528	-4.25444
1.18	0.369637	0.358449	-0.739275	-7.53152	6.79225	-4.32377
1.2	0.362737	0.365704	-0.725475	-7.554	6.82852	-4.38252
1.22	0.353537	0.372775	-0.707075	-7.57095	6.86387	-4.43482
1.24	0.344337	0.379662	-0.688675	-7.58698	6.89831	-4.48529
1.26	0.339637	0.386454	-0.679275	-7.61155	6.93227	-4.54382
1.28	0.339637	0.393247	-0.679275	-7.64551	6.96624	-4.61175
1.3	0.330537	0.399858	-0.661075	-7.66036	6.99929	-4.65965
1.32	0.325837	0.406375	-0.651675	-7.68355	7.03187	-4.71542
1.34	0.330537	0.412985	-0.661075	-7.726	7.06493	-4.79093
1.36	0.314337	0.419272	-0.628675	-7.72504	7.09636	-4.8214
1.38	0.289037	0.425053	-0.578075	-7.70334	7.12526	-4.8286
1.4	0.270737	0.430468	-0.541475	-7.69381	7.15234	-4.84615
1.42	0.268337	0.435834	-0.536675	-7.71585	7.17917	-4.89502
1.44	0.282237	0.441479	-0.564475	-7.77187	7.2074	-4.97927
1.46	0.293737	0.447354	-0.587475	-7.82424	7.23677	-5.06101
1.48	0.302837	0.453411	-0.605675	-7.87273	7.26705	-5.13978
1.5	0.307537	0.459561	-0.615075	-7.91288	7.29781	-5.21069
1.52	0.293737	0.465436	-0.587475	-7.91466	7.32718	-5.24184
1.54	0.266037	0.470757	-0.532075	-7.88586	7.35378	-5.23964
1.56	0.245337	0.475664	-0.490675	-7.86899	7.37832	-5.24731
1.58	0.238437	0.480432	-0.476875	-7.87904	7.40216	-5.2812
1.6	0.229237	0.485017	-0.458475	-7.88356	7.42509	-5.30865
1.62	0.210837	0.489234	-0.421675	-7.86784	7.44617	-5.31401
1.64	0.194737	0.493129	-0.389475	-7.85512	7.46564	-5.32076
1.66	0.197037	0.497069	-0.394075	-7.87942	7.48535	-5.36477
1.68	0.210837	0.501286	-0.421675	-7.92811	7.50643	-5.43454
1.7	0.217737	0.505641	-0.435475	-7.96368	7.5282	-5.49188
1.72	0.213137	0.509904	-0.426275	-7.97579	7.54952	-5.52531
1.74	0.208537	0.514074	-0.417075	-7.98745	7.57037	-5.55782
1.76	0.206237	0.518199	-0.412475	-8.00347	7.591	-5.59447
1.78	0.210837	0.522416	-0.421675	-8.03375	7.61208	-5.64583
1.8	0.210837	0.526633	-0.421675	-8.05484	7.63316	-5.688
1.82	0.203937	0.530711	-0.407875	-8.06143	7.65356	-5.71499
1.84	0.201637	0.534744	-0.403275	-8.077	7.67372	-5.75072
1.86	0.187837	0.538501	-0.375675	-8.06818	7.6925	-5.76068
1.88	0.169437	0.54189	-0.338875	-8.04832	7.70945	-5.75777
1.9	0.153337	0.544956	-0.306675	-8.03146	7.72478	-5.75624
1.92	0.144137	0.547839	-0.288275	-8.02747	7.7392	-5.76667
1.94	0.137237	0.550584	-0.274475	-8.02739	7.75292	-5.78031
1.96	0.144137	0.553467	-0.288275	-8.05561	7.76733	-5.82294
1.98	0.146437	0.556395	-0.292875	-8.07485	7.78198	-5.85683
2	0.127937	0.558954	-0.255875	-8.05065	7.79477	-5.84542
2.02	0.102637	0.561007	-0.205275	-8.01031	7.80503	-5.81534
2.04	0.0911374	0.56283	-0.182275	-7.99642	7.81415	-5.81057
2.06	0.0796374	0.564422	-0.159275	-7.98139	7.82211	-5.8035
2.08	0.0704374	0.565831	-0.140875	-7.97003	7.82916	-5.79919
2.1	0.0636374	0.567104	-0.127275	-7.96279	7.83552	-5.79831
2.12	0.0636374	0.568377	-0.127275	-7.96916	7.84188	-5.81104
2.14	0.0567374	0.569511	-0.113475	-7.96103	7.84756	-5.80859
2.16	0.0383374	0.570278	-0.0766749	-7.92807	7.85139	-5.77946
2.18	0.0175374	0.570629	-0.0350749	-7.88822	7.85314	-5.74136
2.2	0.00603744	0.57075	-0.0120749	-7.86582	7.85375	-5.71957
2.22	0.0152374	0.571054	-0.0304749	-7.88575	7.85527	-5.74102
2.24	0.0198374	0.571451	-0.0396749	-7.89693	7.85726	-5.75419
2.26	0.0106374	0.571664	-0.0212749	-7.87959	7.85832	-5.73791
2.28	0.005	0.571764	-0.01	-7.86882	7.85882	-5.72764
2.3	0.002	0.571804	-0.004	-7.86302	7.85902	-5.72204
2.32	0.002	0.571844	-0.004	-7.86322	7.85922	-5.72244
2.34	0.001	0.571864	-0.002	-7.86132	7.85932	-5.72064
2.36	0.001	0.571884	-0.002	-7.86142	7.85942	-5.72084
2.38	0	0.571884	0	-7.85942	7.85942	-5.71884
2.4	-0.0169626	0.571545	0.0339251	-7.8238	7.85772	-5.68152
2.42	-0.0399626	0.570745	0.0799251	-7.7738	7.85373	-5.62753
2.44	-0.0606626	0.569532	0.121325	-7.72634	7.84766	-5.574
2.46	-0.0813626	0.567905	0.162725	-7.6768	7.83952	-5.51632
2.48	-0.102163	0.565862	0.204325	-7.62498	7.82931	-5.45429
2.5	-0.120563	0.56345	0.241125	-7.57613	7.81725	-5.39338
2.52	-0.141263	0.560625	0.282525	-7.5206	7.80313	-5.32373
2.54	-0.164263	0.55734	0.328525	-7.45817	7.7867	-5.24487
2.56	-0.196363	0.553413	0.392725	-7.37434	7.76706	-5.1414
2.58	-0.244763	0.548517	0.489525	-7.25306	7.74259	-4.99565
2.6	-0.304563	0.542426	0.609125	-7.10301	7.71213	-4.81514
2.62	-0.359863	0.535229	0.719725	-6.95642	7.67614	-4.63256
2.64	-0.398863	0.527252	0.797725	-6.83853	7.63626	-4.47479
2.66	-0.426563	0.51872	0.853125	-6.74048	7.5936	-4.33408
2.68	-0.456463	0.509591	0.912925	-6.63503	7.54796	-4.18299
2.7	-0.477163	0.500048	0.954325	-6.54591	7.50024	-4.04615
2.72	-0.488663	0.490275	0.977325	-6.47405	7.45137	-3.92542
2.74	-0.493263	0.480409	0.986525	-6.41552	7.40205	-3.81757
2.76	-0.507063	0.470268	1.01413	-6.33722	7.35134	-3.68856
2.78	-0.525463	0.459759	1.05093	-6.24787	7.29879	-3.54666
2.8	-0.527763	0.449204	1.05553	-6.19049	7.24602	-3.43651
2.82	-0.520863	0.438786	1.04173	-6.15221	7.19393	-3.34614
2.84	-0.511663	0.428553	1.02333	-6.11944	7.14277	-3.26221
2.86	-0.507063	0.418412	1.01413	-6.07793	7.09206	-3.16999
2.88	-0.507063	0.408271	1.01413	-6.02723	7.04135	-3.06858
2.9	-0.509363	0.398083	1.01873	-5.97169	6.99042	-2.96211
2.92	-0.507063	0.387942	1.01413	-5.92559	6.93971	-2.8653
2.94	-0.500163	0.377939	1.00033	-5.88937	6.88969	-2.77906
2.96	-0.486363	0.368212	0.972725	-5.86833	6.84106	-2.70939
2.98	-0.467963	0.358852	0.935925	-5.85834	6.79426	-2.6526
3	-0.451863	0.349815	0.903725	-5.84535	6.74908	-2.59443
3.02	-0.444963	0.340916	0.889925	-5.81465	6.70458	-2.51923
3.04	-0.431163	0.332293	0.862325	-5.79914	6.66146	-2.4606
3.06	-0.419663	0.323899	0.839325	-5.78017	6.6195	-2.39967
3.08	-0.410363	0.315692	0.820725	-5.75774	6.57846	-2.3362
3.1	-0.403463	0.307623	0.806925	-5.73119	6.53811	-2.2693
3.12	-0.401163	0.2996	0.802325	-5.69567	6.498	-2.19367
3.14	-0.401163	0.291576	0.802325	-5.65556	6.45788	-2.11344
3.16	-0.403463	0.283507	0.806925	-5.61061	6.41754	-2.02815
3.18	-0.403463	0.275438	0.806925	-5.57026	6.37719	-1.94745
3.2	-0.403463	0.267369	0.806925	-5.52992	6.33684	-1.86676
3.22	-0.398863	0.259391	0.797725	-5.49923	6.29696	-1.79619
3.24	-0.394363	0.251504	0.788725	-5.4688	6.25752	-1.72632
3.26	-0.398863	0.243527	0.797725	-5.41991	6.21763	-1.63754
3.28	-0.382863	0.23587	0.765725	-5.41362	6.17935	-1.59297
3.3	-0.375863	0.228352	0.751725	-5.39004	6.14176	-1.5318
3.32	-0.362163	0.221109	0.724325	-5.38122	6.10555	-1.48677
3.34	-0.355163	0.214006	0.710325	-5.3597	6.07003	-1.42973
3.36	-0.355163	0.206903	0.710325	-5.32419	6.03451	-1.3587
3.38	-0.346063	0.199981	0.692125	-5.30778	5.99991	-1.30769
3.4	-0.318363	0.193614	0.636725	-5.33135	5.96807	-1.29942
3.42	-0.288463	0.187845	0.576925	-5.3623	5.93922	-1.30152
3.44	-0.288463	0.182076	0.576925	-5.33345	5.91038	-1.24383
3.46	-0.309163	0.175892	0.618325	-5.26114	5.87946	-1.1406
3.48	-0.318363	0.169525	0.636725	-5.2109	5.84763	-1.05853
3.5	-0.304563	0.163434	0.609125	-5.20804	5.81717	-1.02521
3.52	-0.276963	0.157895	0.553925	-5.23555	5.78947	-1.02502
3.54	-0.263163	0.152631	0.526325	-5.23683	5.76316	-0.999988
3.56	-0.258563	0.14746	0.517125	-5.22018	5.7373	-0.957475
3.58	-0.256263	0.142335	0.512525	-5.19915	5.71167	-0.910823
3.6	-0.251663	0.137302	0.503325	-5.18318	5.68651	-0.86969
3.62	-0.253963	0.132222	0.507925	-5.15319	5.66111	-0.814298
3.64	-0.260863	0.127005	0.521725	-5.1133	5.63503	-0.748325
3.66	-0.258563	0.121834	0.517125	-5.09204	5.60917	-0.701213
3.68	-0.249363	0.116847	0.498725	-5.08551	5.58423	-0.66974
3.7	-0.237863	0.112089	0.475725	-5.08472	5.56045	-0.645168
3.72	-0.244763	0.107194	0.489525	-5.04645	5.53597	-0.582415
3.74	-0.249363	0.102207	0.498725	-5.01231	5.51103	-0.523343
3.76	-0.247063	0.0972655	0.494125	-4.9922	5.48633	-0.47853
3.78	-0.237863	0.0925083	0.475725	-4.98682	5.46254	-0.449358
3.8	-0.233263	0.087843	0.466525	-4.97269	5.43922	-0.411905
3.82	-0.230963	0.0832238	0.461925	-4.95419	5.41612	-0.370313
3.84	-0.230963	0.0786045	0.461925	-4.9311	5.39302	-0.32412
3.86	-0.226363	0.0740773	0.452725	-4.91766	5.37039	-0.288048
3.88	-0.219463	0.069688	0.438925	-4.90952	5.34844	-0.257955
3.9	-0.221763	0.0652528	0.443525	-4.88274	5.32626	-0.209003
3.92	-0.230963	0.0606335	0.461925	-4.84124	5.30317	-0.14441
3.94	-0.235563	0.0559223	0.471125	-4.80849	5.27961	-0.0880977
3.96	-0.228663	0.051349	0.457325	-4.79942	5.25675	-0.0561652
3.98	-0.219463	0.0469598	0.438925	-4.79587	5.2348	-0.0306727
4	-0.212563	0.0427085	0.425125	-4.78842	5.21354	-0.00196018
4.02	-0.201063	0.0386873	0.402125	-4.79131	5.19344	0.0152523
4.04	-0.182663	0.035034	0.365325	-4.80985	5.17517	0.0149848
4.06	-0.161863	0.0317968	0.323725	-4.83526	5.15898	0.00575735
4.08	-0.138963	0.0290175	0.277925	-4.86716	5.14509	-0.0122501
4.1	-0.104363	0.0269303	0.208725	-4.92593	5.13465	-0.0605776
4.12	-0.0859626	0.025211	0.171925	-4.95413	5.12606	-0.0801851
4.14	-0.115863	0.0228938	0.231725	-4.88274	5.11447	0.0027874
4.16	-0.145863	0.0199765	0.291725	-4.80816	5.09988	0.0919599
4.18	-0.161863	0.0167393	0.323725	-4.75997	5.0837	0.156332
4.2	-0.148063	0.013778	0.296125	-4.77276	5.06889	0.158345
4.22	-0.127363	0.0112308	0.254725	-4.80143	5.05615	0.142417
4.24	-0.118163	0.00886752	0.236325	-4.80801	5.04434	0.14765
4.26	-0.106663	0.00673426	0.213325	-4.82035	5.03367	0.145982
4.28	-0.0883626	0.00496701	0.176725	-4.84811	5.02484	0.127055
4.3	-0.0629626	0.00370776	0.125925	-4.89261	5.01854	0.0888475
4.32	-0.0468626	0.00277051	0.0937251	-4.92013	5.01385	0.06602
4.34	-0.0399626	0.00197126	0.0799251	-4.92993	5.00986	0.0602125
4.36	-0.0238626	0.00149401	0.0477251	-4.95974	5.00747	0.032785
4.38	0	0.00149401	0	-5.00747	5.00747	-0.0149401
4.48	0.125737	0.00400876	-0.251475	-5.27152	5.02004	-0.291562
4.5	0.155637	0.00712151	-0.311275	-5.34688	5.03561	-0.38249
4.52	0.183237	0.0107863	-0.366475	-5.42041	5.05393	-0.474337
4.54	0.197037	0.014727	-0.394075	-5.46771	5.07364	-0.541345
4.56	0.210837	0.0189438	-0.421675	-5.51639	5.09472	-0.611112
4.58	0.229237	0.0235285	-0.458475	-5.57612	5.11764	-0.69376
4.6	0.247637	0.0284813	-0.495275	-5.63768	5.14241	-0.780087
4.62	0.259237	0.033666	-0.518475	-5.6868	5.16833	-0.855135
4.64	0.275337	0.0391727	-0.550675	-5.74654	5.19586	-0.942402
4.66	0.289037	0.0449535	-0.578075	-5.80284	5.22477	-1.02761
4.68	0.302837	0.0510102	-0.605675	-5.86073	5.25505	-1.11578

## Sheet: FIG 1
									Raw =	2	cmH2O·s/l
									EL =	5	cmH2O/l
									ECW =	5	cmH2O/l
									Ppl(FRC) =	5	cmH2O

## Sheet: DATA 2
								Raw =	2	cmH2O·s/l
								EL =	5	cmH2O/l
								ECW =	5	cmH2O/l
								PL(FRC) =	5	cmH2O
t	V'	V	Palv	Ppl	PL	Pmus
s	l/s	l	cmH2O	cmH2O	cmH2O	cmH2O
0	0	0	0	-5	5	0
0.02	0.01	0.0002	-0.02	-5.021	5.001	-0.022
0.04	0.0221374	0.000642749	-0.0442749	-5.04749	5.00321	-0.0507024
0.06	0.0475374	0.0015935	-0.0950749	-5.10304	5.00797	-0.11101
0.08	0.0704374	0.00300225	-0.140875	-5.15589	5.01501	-0.170897
0.1	0.0774374	0.004551	-0.154875	-5.17763	5.02275	-0.200385
0.12	0.0866374	0.00628374	-0.173275	-5.20469	5.03142	-0.236112
0.14	0.102637	0.00833649	-0.205275	-5.24696	5.04168	-0.28864
0.16	0.121037	0.0107572	-0.242075	-5.29586	5.05379	-0.349647
0.18	0.137237	0.013502	-0.274475	-5.34198	5.06751	-0.409495
0.2	0.148737	0.0164767	-0.297475	-5.37986	5.08238	-0.462242
0.22	0.162537	0.0197275	-0.325075	-5.42371	5.09864	-0.52235
0.24	0.190137	0.0235302	-0.380275	-5.49793	5.11765	-0.615577
0.26	0.229237	0.028115	-0.458475	-5.59905	5.14057	-0.739625
0.28	0.268337	0.0334817	-0.536675	-5.70408	5.16741	-0.871492
0.3	0.291337	0.0393085	-0.582675	-5.77922	5.19654	-0.97576
0.32	0.300537	0.0453192	-0.601075	-5.82767	5.2266	-1.05427
0.34	0.307537	0.05147	-0.615075	-5.87242	5.25735	-1.12977
0.36	0.319037	0.0578507	-0.638075	-5.92733	5.28925	-1.21658
0.38	0.316637	0.0641835	-0.633275	-5.95419	5.32092	-1.27511
0.4	0.298337	0.0701502	-0.596675	-5.94743	5.35075	-1.29818
0.42	0.268337	0.075517	-0.536675	-5.91426	5.37758	-1.29184
0.44	0.240737	0.0803317	-0.481475	-5.88313	5.40166	-1.28479
0.46	0.229237	0.0849165	-0.458475	-5.88306	5.42458	-1.30764
0.48	0.231537	0.0895472	-0.463075	-5.91081	5.44774	-1.35855
0.5	0.245337	0.094454	-0.490675	-5.96294	5.47227	-1.43521
0.52	0.263737	0.0997287	-0.527475	-6.02612	5.49864	-1.52476
0.54	0.282237	0.105373	-0.564475	-6.09134	5.52687	-1.61821
0.56	0.300537	0.111384	-0.601075	-6.158	5.55692	-1.71492
0.58	0.316637	0.117717	-0.633275	-6.22186	5.58858	-1.81044
0.6	0.351137	0.12474	-0.702275	-6.32597	5.6237	-1.94967
0.62	0.383437	0.132408	-0.766875	-6.42892	5.66204	-2.09096
0.64	0.399537	0.140399	-0.799075	-6.50107	5.702	-2.20307
0.66	0.392637	0.148252	-0.785275	-6.52653	5.74126	-2.26779
0.68	0.383437	0.155921	-0.766875	-6.54648	5.7796	-2.32608
0.7	0.388037	0.163681	-0.776075	-6.59448	5.81841	-2.41289
0.72	0.417937	0.17204	-0.835875	-6.69608	5.8602	-2.55628
0.74	0.445537	0.180951	-0.891075	-6.79583	5.90475	-2.70058
0.76	0.459337	0.190138	-0.918675	-6.86936	5.95069	-2.82005
0.78	0.461637	0.19937	-0.923275	-6.92013	5.99685	-2.91698
0.8	0.459337	0.208557	-0.918675	-6.96146	6.04279	-3.00425
0.82	0.450137	0.21756	-0.900275	-6.98807	6.0878	-3.07587
0.84	0.429437	0.226149	-0.858875	-6.98962	6.13074	-3.12036
0.86	0.415637	0.234461	-0.831275	-7.00358	6.17231	-3.17589
0.88	0.413337	0.242728	-0.826675	-7.04032	6.21364	-3.25396
0.9	0.411037	0.250949	-0.822075	-7.07682	6.25474	-3.33156
0.92	0.406437	0.259078	-0.812875	-7.10826	6.29539	-3.40365
0.94	0.401837	0.267114	-0.803675	-7.13925	6.33557	-3.47482
0.96	0.397237	0.275059	-0.794475	-7.16977	6.3753	-3.54507
0.98	0.392637	0.282912	-0.785275	-7.19983	6.41456	-3.61439
1	0.381137	0.290535	-0.762275	-7.21495	6.45267	-3.66762
1.02	0.374237	0.298019	-0.748475	-7.23857	6.4901	-3.72867
1.04	0.376537	0.30555	-0.753075	-7.28083	6.52775	-3.80858
1.06	0.383437	0.313219	-0.766875	-7.33297	6.56609	-3.89906
1.08	0.388037	0.32098	-0.776075	-7.38097	6.6049	-3.98587
1.1	0.383437	0.328648	-0.766875	-7.41012	6.64324	-4.05336
1.12	0.376537	0.336179	-0.753075	-7.43397	6.6809	-4.11487
1.14	0.371937	0.343618	-0.743875	-7.46196	6.71809	-4.18005
1.16	0.371937	0.351057	-0.743875	-7.49916	6.75528	-4.25444
1.18	0.369637	0.358449	-0.739275	-7.53152	6.79225	-4.32377
1.2	0.362737	0.365704	-0.725475	-7.554	6.82852	-4.38252
1.22	0.353537	0.372775	-0.707075	-7.57095	6.86387	-4.43482
1.24	0.344337	0.379662	-0.688675	-7.58698	6.89831	-4.48529
1.26	0.339637	0.386454	-0.679275	-7.61155	6.93227	-4.54382
1.28	0.339637	0.393247	-0.679275	-7.64551	6.96624	-4.61175
1.3	0.330537	0.399858	-0.661075	-7.66036	6.99929	-4.65965
1.32	0.325837	0.406375	-0.651675	-7.68355	7.03187	-4.71542
1.34	0.330537	0.412985	-0.661075	-7.726	7.06493	-4.79093
1.36	0.314337	0.419272	-0.628675	-7.72504	7.09636	-4.8214
1.38	0.289037	0.425053	-0.578075	-7.70334	7.12526	-4.8286
1.4	0.270737	0.430468	-0.541475	-7.69381	7.15234	-4.84615
1.42	0.268337	0.435834	-0.536675	-7.71585	7.17917	-4.89502
1.44	0.282237	0.441479	-0.564475	-7.77187	7.2074	-4.97927
1.46	0.293737	0.447354	-0.587475	-7.82424	7.23677	-5.06101
1.48	0.302837	0.453411	-0.605675	-7.87273	7.26705	-5.13978
1.5	0.307537	0.459561	-0.615075	-7.91288	7.29781	-5.21069
1.52	0.293737	0.465436	-0.587475	-7.91466	7.32718	-5.24184
1.54	0.266037	0.470757	-0.532075	-7.88586	7.35378	-5.23964
1.56	0.245337	0.475664	-0.490675	-7.86899	7.37832	-5.24731
1.58	0.238437	0.480432	-0.476875	-7.87904	7.40216	-5.2812
1.6	0.229237	0.485017	-0.458475	-7.88356	7.42509	-5.30865
1.62	0.210837	0.489234	-0.421675	-7.86784	7.44617	-5.31401
1.64	0.194737	0.493129	-0.389475	-7.85512	7.46564	-5.32076
1.66	0.197037	0.497069	-0.394075	-7.87942	7.48535	-5.36477
1.68	0.210837	0.501286	-0.421675	-7.92811	7.50643	-5.43454
1.7	0.217737	0.505641	-0.435475	-7.96368	7.5282	-5.49188
1.72	0.213137	0.509904	-0.426275	-7.97579	7.54952	-5.52531
1.74	0.208537	0.514074	-0.417075	-7.98745	7.57037	-5.55782
1.76	0.206237	0.518199	-0.412475	-8.00347	7.591	-5.59447
1.78	0.210837	0.522416	-0.421675	-8.03375	7.61208	-5.64583
1.8	0.210837	0.526633	-0.421675	-8.05484	7.63316	-5.688
1.82	0.203937	0.530711	-0.407875	-8.06143	7.65356	-5.71499
1.84	0.201637	0.534744	-0.403275	-8.077	7.67372	-5.75072
1.86	0.187837	0.538501	-0.375675	-8.06818	7.6925	-5.76068
1.88	0.169437	0.54189	-0.338875	-8.04832	7.70945	-5.75777
1.9	0.153337	0.544956	-0.306675	-8.03146	7.72478	-5.75624
1.92	0.144137	0.547839	-0.288275	-8.02747	7.7392	-5.76667
1.94	0.137237	0.550584	-0.274475	-8.02739	7.75292	-5.78031
1.96	0.144137	0.553467	-0.288275	-8.05561	7.76733	-5.82294
1.98	0.146437	0.556395	-0.292875	-8.07485	7.78198	-5.85683
2	0.127937	0.558954	-0.255875	-8.05065	7.79477	-5.84542
2.02	0.102637	0.561007	-0.205275	-8.01031	7.80503	-5.81534
2.04	0.0911374	0.56283	-0.182275	-7.99642	7.81415	-5.81057
2.06	0.0796374	0.564422	-0.159275	-7.98139	7.82211	-5.8035
2.08	0.0704374	0.565831	-0.140875	-7.97003	7.82916	-5.79919
2.1	0.0636374	0.567104	-0.127275	-7.96279	7.83552	-5.79831
2.12	0.0636374	0.568377	-0.127275	-7.96916	7.84188	-5.81104
2.14	0.0567374	0.569511	-0.113475	-7.96103	7.84756	-5.80859
2.16	0.0383374	0.570278	-0.0766749	-7.92807	7.85139	-5.77946
2.18	0.0175374	0.570629	-0.0350749	-7.88822	7.85314	-5.74136
2.2	0.00603744	0.57075	-0.0120749	-7.86582	7.85375	-5.71957
2.22	0.0152374	0.571054	-0.0304749	-7.88575	7.85527	-5.74102
2.24	0.0198374	0.571451	-0.0396749	-7.89693	7.85726	-5.75419
2.26	0.0106374	0.571664	-0.0212749	-7.87959	7.85832	-5.73791
2.28	0.005	0.571764	-0.01	-7.86882	7.85882	-5.72764
2.3	0.002	0.571804	-0.004	-7.86302	7.85902	-5.72204
2.32	0.002	0.571844	-0.004	-7.86322	7.85922	-5.72244
2.34	0.001	0.571864	-0.002	-7.86132	7.85932	-5.72064
2.36	0.001	0.571884	-0.002	-7.86142	7.85942	-5.72084
2.38	0	0.571884	0	-7.85942	7.85942	-5.71884
2.4	-0.0169626	0.571545	0.0339251	-7.8238	7.85772	-5.68152
2.42	-0.0399626	0.570745	0.0799251	-7.7738	7.85373	-5.62753
2.44	-0.0606626	0.569532	0.121325	-7.72634	7.84766	-5.574
2.46	-0.0813626	0.567905	0.162725	-7.6768	7.83952	-5.51632
2.48	-0.102163	0.565862	0.204325	-7.62498	7.82931	-5.45429
2.5	-0.120563	0.56345	0.241125	-7.57613	7.81725	-5.39338
2.52	-0.141263	0.560625	0.282525	-7.5206	7.80313	-5.32373
2.54	-0.164263	0.55734	0.328525	-7.45817	7.7867	-5.24487
2.56	-0.196363	0.553413	0.392725	-7.37434	7.76706	-5.1414
2.58	-0.244763	0.548517	0.489525	-7.25306	7.74259	-4.99565
2.6	-0.304563	0.542426	0.609125	-7.10301	7.71213	-4.81514
2.62	-0.359863	0.535229	0.719725	-6.95642	7.67614	-4.63256
2.64	-0.398863	0.527252	0.797725	-6.83853	7.63626	-4.47479
2.66	-0.426563	0.51872	0.853125	-6.74048	7.5936	-4.33408
2.68	-0.456463	0.509591	0.912925	-6.63503	7.54796	-4.18299
2.7	-0.477163	0.500048	0.954325	-6.54591	7.50024	-4.04615
2.72	-0.488663	0.490275	0.977325	-6.47405	7.45137	-3.92542
2.74	-0.493263	0.480409	0.986525	-6.41552	7.40205	-3.81757
2.76	-0.507063	0.470268	1.01413	-6.33722	7.35134	-3.68856
2.78	-0.525463	0.459759	1.05093	-6.24787	7.29879	-3.54666
2.8	-0.527763	0.449204	1.05553	-6.19049	7.24602	-3.43651
2.82	-0.520863	0.438786	1.04173	-6.15221	7.19393	-3.34614
2.84	-0.511663	0.428553	1.02333	-6.11944	7.14277	-3.26221
2.86	-0.507063	0.418412	1.01413	-6.07793	7.09206	-3.16999
2.88	-0.507063	0.408271	1.01413	-6.02723	7.04135	-3.06858
2.9	-0.509363	0.398083	1.01873	-5.97169	6.99042	-2.96211
2.92	-0.507063	0.387942	1.01413	-5.92559	6.93971	-2.8653
2.94	-0.500163	0.377939	1.00033	-5.88937	6.88969	-2.77906
2.96	-0.486363	0.368212	0.972725	-5.86833	6.84106	-2.70939
2.98	-0.467963	0.358852	0.935925	-5.85834	6.79426	-2.6526
3	-0.451863	0.349815	0.903725	-5.84535	6.74908	-2.59443
3.02	-0.444963	0.340916	0.889925	-5.81465	6.70458	-2.51923
3.04	-0.431163	0.332293	0.862325	-5.79914	6.66146	-2.4606
3.06	-0.419663	0.323899	0.839325	-5.78017	6.6195	-2.39967
3.08	-0.410363	0.315692	0.820725	-5.75774	6.57846	-2.3362
3.1	-0.403463	0.307623	0.806925	-5.73119	6.53811	-2.2693
3.12	-0.401163	0.2996	0.802325	-5.69567	6.498	-2.19367
3.14	-0.401163	0.291576	0.802325	-5.65556	6.45788	-2.11344
3.16	-0.403463	0.283507	0.806925	-5.61061	6.41754	-2.02815
3.18	-0.403463	0.275438	0.806925	-5.57026	6.37719	-1.94745
3.2	-0.403463	0.267369	0.806925	-5.52992	6.33684	-1.86676
3.22	-0.398863	0.259391	0.797725	-5.49923	6.29696	-1.79619
3.24	-0.394363	0.251504	0.788725	-5.4688	6.25752	-1.72632
3.26	-0.398863	0.243527	0.797725	-5.41991	6.21763	-1.63754
3.28	-0.382863	0.23587	0.765725	-5.41362	6.17935	-1.59297
3.3	-0.375863	0.228352	0.751725	-5.39004	6.14176	-1.5318
3.32	-0.362163	0.221109	0.724325	-5.38122	6.10555	-1.48677
3.34	-0.355163	0.214006	0.710325	-5.3597	6.07003	-1.42973
3.36	-0.355163	0.206903	0.710325	-5.32419	6.03451	-1.3587
3.38	-0.346063	0.199981	0.692125	-5.30778	5.99991	-1.30769
3.4	-0.318363	0.193614	0.636725	-5.33135	5.96807	-1.29942
3.42	-0.288463	0.187845	0.576925	-5.3623	5.93922	-1.30152
3.44	-0.288463	0.182076	0.576925	-5.33345	5.91038	-1.24383
3.46	-0.309163	0.175892	0.618325	-5.26114	5.87946	-1.1406
3.48	-0.318363	0.169525	0.636725	-5.2109	5.84763	-1.05853
3.5	-0.304563	0.163434	0.609125	-5.20804	5.81717	-1.02521
3.52	-0.276963	0.157895	0.553925	-5.23555	5.78947	-1.02502
3.54	-0.263163	0.152631	0.526325	-5.23683	5.76316	-0.999988
3.56	-0.258563	0.14746	0.517125	-5.22018	5.7373	-0.957475
3.58	-0.256263	0.142335	0.512525	-5.19915	5.71167	-0.910823
3.6	-0.251663	0.137302	0.503325	-5.18318	5.68651	-0.86969
3.62	-0.253963	0.132222	0.507925	-5.15319	5.66111	-0.814298
3.64	-0.260863	0.127005	0.521725	-5.1133	5.63503	-0.748325
3.66	-0.258563	0.121834	0.517125	-5.09204	5.60917	-0.701213
3.68	-0.249363	0.116847	0.498725	-5.08551	5.58423	-0.66974
3.7	-0.237863	0.112089	0.475725	-5.08472	5.56045	-0.645168
3.72	-0.244763	0.107194	0.489525	-5.04645	5.53597	-0.582415
3.74	-0.249363	0.102207	0.498725	-5.01231	5.51103	-0.523343
3.76	-0.247063	0.0972655	0.494125	-4.9922	5.48633	-0.47853
3.78	-0.237863	0.0925083	0.475725	-4.98682	5.46254	-0.449358
3.8	-0.233263	0.087843	0.466525	-4.97269	5.43922	-0.411905
3.82	-0.230963	0.0832238	0.461925	-4.95419	5.41612	-0.370313
3.84	-0.230963	0.0786045	0.461925	-4.9311	5.39302	-0.32412
3.86	-0.226363	0.0740773	0.452725	-4.91766	5.37039	-0.288048
3.88	-0.219463	0.069688	0.438925	-4.90952	5.34844	-0.257955
3.9	-0.221763	0.0652528	0.443525	-4.88274	5.32626	-0.209003
3.92	-0.230963	0.0606335	0.461925	-4.84124	5.30317	-0.14441
3.94	-0.235563	0.0559223	0.471125	-4.80849	5.27961	-0.0880977
3.96	-0.228663	0.051349	0.457325	-4.79942	5.25675	-0.0561652
3.98	-0.219463	0.0469598	0.438925	-4.79587	5.2348	-0.0306727
4	-0.212563	0.0427085	0.425125	-4.78842	5.21354	-0.00196018
4.02	-0.201063	0.0386873	0.402125	-4.79131	5.19344	0.0152523
4.04	-0.182663	0.035034	0.365325	-4.80985	5.17517	0.0149848
4.06	-0.161863	0.0317968	0.323725	-4.83526	5.15898	0.00575735
4.08	-0.138963	0.0290175	0.277925	-4.86716	5.14509	-0.0122501
4.1	-0.104363	0.0269303	0.208725	-4.92593	5.13465	-0.0605776
4.12	-0.0859626	0.025211	0.171925	-4.95413	5.12606	-0.0801851
4.14	-0.115863	0.0228938	0.231725	-4.88274	5.11447	0.0027874
4.16	-0.145863	0.0199765	0.291725	-4.80816	5.09988	0.0919599
4.18	-0.161863	0.0167393	0.323725	-4.75997	5.0837	0.156332
4.2	-0.148063	0.013778	0.296125	-4.77276	5.06889	0.158345
4.22	-0.127363	0.0112308	0.254725	-4.80143	5.05615	0.142417
4.24	-0.118163	0.00886752	0.236325	-4.80801	5.04434	0.14765
4.26	-0.106663	0.00673426	0.213325	-4.82035	5.03367	0.145982
4.28	-0.0883626	0.00496701	0.176725	-4.84811	5.02484	0.127055
4.3	-0.0629626	0.00370776	0.125925	-4.89261	5.01854	0.0888475
4.32	-0.0468626	0.00277051	0.0937251	-4.92013	5.01385	0.06602
4.34	-0.0399626	0.00197126	0.0799251	-4.92993	5.00986	0.0602125
4.36	-0.0238626	0.00149401	0.0477251	-4.95974	5.00747	0.032785
4.38	0	0.00149401	0	-5.00747	5.00747	-0.0149401
4.48	0.125737	0.00400876	-0.251475	-5.27152	5.02004	-0.291562
4.5	0.155637	0.00712151	-0.311275	-5.34688	5.03561	-0.38249
4.52	0.183237	0.0107863	-0.366475	-5.42041	5.05393	-0.474337
4.54	0.197037	0.014727	-0.394075	-5.46771	5.07364	-0.541345
4.56	0.210837	0.0189438	-0.421675	-5.51639	5.09472	-0.611112
4.58	0.229237	0.0235285	-0.458475	-5.57612	5.11764	-0.69376
4.6	0.247637	0.0284813	-0.495275	-5.63768	5.14241	-0.780087
4.62	0.259237	0.033666	-0.518475	-5.6868	5.16833	-0.855135
4.64	0.275337	0.0391727	-0.550675	-5.74654	5.19586	-0.942402
4.66	0.289037	0.0449535	-0.578075	-5.80284	5.22477	-1.02761
4.68	0.302837	0.0510102	-0.605675	-5.86073	5.25505	-1.11578

## Sheet: FIG 2
									dashed lines
									Raw =	2	cmH2O·s/l
									EL =	5	cmH2O/l
									ECW =	5	cmH2O/l
									PL(FRC) =	5	cmH2O
									solid lines
									Raw =	2	cmH2O·s/l
									EL =	5	cmH2O/l
									ECW =	5	cmH2O/l
									PL(FRC) =	5	cmH2O

## Sheet: DATA 3
								Raw =	6	cmH2O·s/l
								EL =	5	cmH2O/l
								ECW =	5	cmH2O/l
								PL(FRC) =	5	cmH2O
t	V'	V	Palv	Ppl	PL	Pmus
s	l/s	l	cmH2O	cmH2O	cmH2O	cmH2O
0	0	0	0	-5	5	0
0.02	0.01	0.0002	-0.06	-5.061	5.001	-0.062
0.04	0.0221374	0.000642749	-0.132825	-5.13604	5.00321	-0.139252
0.06	0.0475374	0.0015935	-0.285225	-5.29319	5.00797	-0.30116
0.08	0.0704374	0.00300225	-0.422625	-5.43764	5.01501	-0.452647
0.1	0.0774374	0.004551	-0.464625	-5.48738	5.02275	-0.510135
0.12	0.0866374	0.00628374	-0.519825	-5.55124	5.03142	-0.582662
0.14	0.102637	0.00833649	-0.615825	-5.65751	5.04168	-0.69919
0.16	0.121037	0.0107572	-0.726225	-5.78001	5.05379	-0.833797
0.18	0.137237	0.013502	-0.823425	-5.89093	5.06751	-0.958445
0.2	0.148737	0.0164767	-0.892425	-5.97481	5.08238	-1.05719
0.22	0.162537	0.0197275	-0.975225	-6.07386	5.09864	-1.1725
0.24	0.190137	0.0235302	-1.14082	-6.25848	5.11765	-1.37613
0.26	0.229237	0.028115	-1.37542	-6.516	5.14057	-1.65657
0.28	0.268337	0.0334817	-1.61002	-6.77743	5.16741	-1.94484
0.3	0.291337	0.0393085	-1.74802	-6.94457	5.19654	-2.14111
0.32	0.300537	0.0453192	-1.80322	-7.02982	5.2266	-2.25642
0.34	0.307537	0.05147	-1.84522	-7.10257	5.25735	-2.35992
0.36	0.319037	0.0578507	-1.91422	-7.20348	5.28925	-2.49273
0.38	0.316637	0.0641835	-1.89982	-7.22074	5.32092	-2.54166
0.4	0.298337	0.0701502	-1.79002	-7.14078	5.35075	-2.49153
0.42	0.268337	0.075517	-1.61002	-6.98761	5.37758	-2.36519
0.44	0.240737	0.0803317	-1.44442	-6.84608	5.40166	-2.24774
0.46	0.229237	0.0849165	-1.37542	-6.80001	5.42458	-2.22459
0.48	0.231537	0.0895472	-1.38922	-6.83696	5.44774	-2.2847
0.5	0.245337	0.094454	-1.47202	-6.94429	5.47227	-2.41656
0.52	0.263737	0.0997287	-1.58242	-7.08107	5.49864	-2.57971
0.54	0.282237	0.105373	-1.69342	-7.22029	5.52687	-2.74716
0.56	0.300537	0.111384	-1.80322	-7.36015	5.55692	-2.91707
0.58	0.316637	0.117717	-1.89982	-7.48841	5.58858	-3.07699
0.6	0.351137	0.12474	-2.10682	-7.73052	5.6237	-3.35422
0.62	0.383437	0.132408	-2.30062	-7.96267	5.66204	-3.62471
0.64	0.399537	0.140399	-2.39722	-8.09922	5.702	-3.80122
0.66	0.392637	0.148252	-2.35582	-8.09708	5.74126	-3.83834
0.68	0.383437	0.155921	-2.30062	-8.08023	5.7796	-3.85983
0.7	0.388037	0.163681	-2.32822	-8.14663	5.81841	-3.96504
0.72	0.417937	0.17204	-2.50762	-8.36783	5.8602	-4.22803
0.74	0.445537	0.180951	-2.67322	-8.57798	5.90475	-4.48273
0.76	0.459337	0.190138	-2.75602	-8.70671	5.95069	-4.6574
0.78	0.461637	0.19937	-2.76982	-8.76668	5.99685	-4.76353
0.8	0.459337	0.208557	-2.75602	-8.79881	6.04279	-4.8416
0.82	0.450137	0.21756	-2.70082	-8.78862	6.0878	-4.87642
0.84	0.429437	0.226149	-2.57662	-8.70737	6.13074	-4.83811
0.86	0.415637	0.234461	-2.49382	-8.66613	6.17231	-4.83844
0.88	0.413337	0.242728	-2.48002	-8.69367	6.21364	-4.90731
0.9	0.411037	0.250949	-2.46622	-8.72097	6.25474	-4.97571
0.92	0.406437	0.259078	-2.43862	-8.73401	6.29539	-5.0294
0.94	0.401837	0.267114	-2.41102	-8.7466	6.33557	-5.08217
0.96	0.397237	0.275059	-2.38342	-8.75872	6.3753	-5.13402
0.98	0.392637	0.282912	-2.35582	-8.77038	6.41456	-5.18494
1	0.381137	0.290535	-2.28682	-8.7395	6.45267	-5.19217
1.02	0.374237	0.298019	-2.24542	-8.73552	6.4901	-5.22562
1.04	0.376537	0.30555	-2.25922	-8.78698	6.52775	-5.31473
1.06	0.383437	0.313219	-2.30062	-8.86672	6.56609	-5.43281
1.08	0.388037	0.32098	-2.32822	-8.93312	6.6049	-5.53802
1.1	0.383437	0.328648	-2.30062	-8.94387	6.64324	-5.58711
1.12	0.376537	0.336179	-2.25922	-8.94012	6.6809	-5.62102
1.14	0.371937	0.343618	-2.23162	-8.94971	6.71809	-5.6678
1.16	0.371937	0.351057	-2.23162	-8.98691	6.75528	-5.74219
1.18	0.369637	0.358449	-2.21782	-9.01007	6.79225	-5.80232
1.2	0.362737	0.365704	-2.17642	-9.00495	6.82852	-5.83347
1.22	0.353537	0.372775	-2.12122	-8.9851	6.86387	-5.84897
1.24	0.344337	0.379662	-2.06602	-8.96433	6.89831	-5.86264
1.26	0.339637	0.386454	-2.03782	-8.9701	6.93227	-5.90237
1.28	0.339637	0.393247	-2.03782	-9.00406	6.96624	-5.9703
1.3	0.330537	0.399858	-1.98322	-8.98251	6.99929	-5.9818
1.32	0.325837	0.406375	-1.95502	-8.9869	7.03187	-6.01877
1.34	0.330537	0.412985	-1.98322	-9.04815	7.06493	-6.11308
1.36	0.314337	0.419272	-1.88602	-8.98239	7.09636	-6.07875
1.38	0.289037	0.425053	-1.73422	-8.85949	7.12526	-5.98475
1.4	0.270737	0.430468	-1.62442	-8.77676	7.15234	-5.9291
1.42	0.268337	0.435834	-1.61002	-8.7892	7.17917	-5.96837
1.44	0.282237	0.441479	-1.69342	-8.90082	7.2074	-6.10822
1.46	0.293737	0.447354	-1.76242	-8.99919	7.23677	-6.23596
1.48	0.302837	0.453411	-1.81702	-9.08408	7.26705	-6.35113
1.5	0.307537	0.459561	-1.84522	-9.14303	7.29781	-6.44084
1.52	0.293737	0.465436	-1.76242	-9.08961	7.32718	-6.41679
1.54	0.266037	0.470757	-1.59622	-8.95001	7.35378	-6.30379
1.56	0.245337	0.475664	-1.47202	-8.85034	7.37832	-6.22866
1.58	0.238437	0.480432	-1.43062	-8.83279	7.40216	-6.23495
1.6	0.229237	0.485017	-1.37542	-8.80051	7.42509	-6.2256
1.62	0.210837	0.489234	-1.26502	-8.71119	7.44617	-6.15736
1.64	0.194737	0.493129	-1.16842	-8.63407	7.46564	-6.09971
1.66	0.197037	0.497069	-1.18222	-8.66757	7.48535	-6.15292
1.68	0.210837	0.501286	-1.26502	-8.77146	7.50643	-6.27789
1.7	0.217737	0.505641	-1.30642	-8.83463	7.5282	-6.36283
1.72	0.213137	0.509904	-1.27882	-8.82834	7.54952	-6.37786
1.74	0.208537	0.514074	-1.25122	-8.8216	7.57037	-6.39197
1.76	0.206237	0.518199	-1.23742	-8.82842	7.591	-6.41942
1.78	0.210837	0.522416	-1.26502	-8.8771	7.61208	-6.48918
1.8	0.210837	0.526633	-1.26502	-8.89819	7.63316	-6.53135
1.82	0.203937	0.530711	-1.22362	-8.87718	7.65356	-6.53074
1.84	0.201637	0.534744	-1.20982	-8.88355	7.67372	-6.55727
1.86	0.187837	0.538501	-1.12702	-8.81953	7.6925	-6.51203
1.88	0.169437	0.54189	-1.01662	-8.72607	7.70945	-6.43552
1.9	0.153337	0.544956	-0.920025	-8.64481	7.72478	-6.36959
1.92	0.144137	0.547839	-0.864825	-8.60402	7.7392	-6.34322
1.94	0.137237	0.550584	-0.823425	-8.57634	7.75292	-6.32926
1.96	0.144137	0.553467	-0.864825	-8.63216	7.76733	-6.39949
1.98	0.146437	0.556395	-0.878625	-8.6606	7.78198	-6.44258
2	0.127937	0.558954	-0.767625	-8.5624	7.79477	-6.35717
2.02	0.102637	0.561007	-0.615825	-8.42086	7.80503	-6.22589
2.04	0.0911374	0.56283	-0.546825	-8.36097	7.81415	-6.17512
2.06	0.0796374	0.564422	-0.477825	-8.29994	7.82211	-6.12205
2.08	0.0704374	0.565831	-0.422625	-8.25178	7.82916	-6.08094
2.1	0.0636374	0.567104	-0.381825	-8.21734	7.83552	-6.05286
2.12	0.0636374	0.568377	-0.381825	-8.22371	7.84188	-6.06559
2.14	0.0567374	0.569511	-0.340425	-8.18798	7.84756	-6.03554
2.16	0.0383374	0.570278	-0.230025	-8.08142	7.85139	-5.93281
2.18	0.0175374	0.570629	-0.105225	-7.95837	7.85314	-5.81151
2.2	0.00603744	0.57075	-0.0362247	-7.88997	7.85375	-5.74372
2.22	0.0152374	0.571054	-0.0914247	-7.9467	7.85527	-5.80197
2.24	0.0198374	0.571451	-0.119025	-7.97628	7.85726	-5.83354
2.26	0.0106374	0.571664	-0.0638247	-7.92214	7.85832	-5.78046
2.28	0.005	0.571764	-0.03	-7.88882	7.85882	-5.74764
2.3	0.002	0.571804	-0.012	-7.87102	7.85902	-5.73004
2.32	0.002	0.571844	-0.012	-7.87122	7.85922	-5.73044
2.34	0.001	0.571864	-0.006	-7.86532	7.85932	-5.72464
2.36	0.001	0.571884	-0.006	-7.86542	7.85942	-5.72484
2.38	0	0.571884	0	-7.85942	7.85942	-5.71884
2.4	-0.0169626	0.571545	0.101775	-7.75595	7.85772	-5.61367
2.42	-0.0399626	0.570745	0.239775	-7.61395	7.85373	-5.46768
2.44	-0.0606626	0.569532	0.363975	-7.48369	7.84766	-5.33135
2.46	-0.0813626	0.567905	0.488175	-7.35135	7.83952	-5.19087
2.48	-0.102163	0.565862	0.612975	-7.21633	7.82931	-5.04564
2.5	-0.120563	0.56345	0.723375	-7.09388	7.81725	-4.91113
2.52	-0.141263	0.560625	0.847575	-6.95555	7.80313	-4.75868
2.54	-0.164263	0.55734	0.985575	-6.80112	7.7867	-4.58782
2.56	-0.196363	0.553413	1.17818	-6.58889	7.76706	-4.35595
2.58	-0.244763	0.548517	1.46858	-6.27401	7.74259	-4.0166
2.6	-0.304563	0.542426	1.82738	-5.88476	7.71213	-3.59689
2.62	-0.359863	0.535229	2.15918	-5.51697	7.67614	-3.19311
2.64	-0.398863	0.527252	2.39318	-5.24308	7.63626	-2.87934
2.66	-0.426563	0.51872	2.55938	-5.03423	7.5936	-2.62783
2.68	-0.456463	0.509591	2.73878	-4.80918	7.54796	-2.35714
2.7	-0.477163	0.500048	2.86298	-4.63726	7.50024	-2.1375
2.72	-0.488663	0.490275	2.93198	-4.5194	7.45137	-1.97077
2.74	-0.493263	0.480409	2.95958	-4.44247	7.40205	-1.84452
2.76	-0.507063	0.470268	3.04238	-4.30897	7.35134	-1.66031
2.78	-0.525463	0.459759	3.15278	-4.14602	7.29879	-1.44481
2.8	-0.527763	0.449204	3.16658	-4.07944	7.24602	-1.32546
2.82	-0.520863	0.438786	3.12518	-4.06876	7.19393	-1.26269
2.84	-0.511663	0.428553	3.06998	-4.07279	7.14277	-1.21556
2.86	-0.507063	0.418412	3.04238	-4.04968	7.09206	-1.14174
2.88	-0.507063	0.408271	3.04238	-3.99898	7.04135	-1.04033
2.9	-0.509363	0.398083	3.05618	-3.93424	6.99042	-0.924658
2.92	-0.507063	0.387942	3.04238	-3.89734	6.93971	-0.837046
2.94	-0.500163	0.377939	3.00098	-3.88872	6.88969	-0.778413
2.96	-0.486363	0.368212	2.91818	-3.92288	6.84106	-0.763941
2.98	-0.467963	0.358852	2.80778	-3.98649	6.79426	-0.780748
3	-0.451863	0.349815	2.71118	-4.0379	6.74908	-0.786976
3.02	-0.444963	0.340916	2.66978	-4.0348	6.70458	-0.739383
3.04	-0.431163	0.332293	2.58698	-4.07449	6.66146	-0.735951
3.06	-0.419663	0.323899	2.51798	-4.10152	6.6195	-0.721018
3.08	-0.410363	0.315692	2.46218	-4.11629	6.57846	-0.694745
3.1	-0.403463	0.307623	2.42078	-4.11734	6.53811	-0.655453
3.12	-0.401163	0.2996	2.40698	-4.09102	6.498	-0.58902
3.14	-0.401163	0.291576	2.40698	-4.05091	6.45788	-0.508788
3.16	-0.403463	0.283507	2.42078	-3.99676	6.41754	-0.414295
3.18	-0.403463	0.275438	2.42078	-3.95641	6.37719	-0.333603
3.2	-0.403463	0.267369	2.42078	-3.91607	6.33684	-0.25291
3.22	-0.398863	0.259391	2.39318	-3.90378	6.29696	-0.200738
3.24	-0.394363	0.251504	2.36618	-3.89135	6.25752	-0.148865
3.26	-0.398863	0.243527	2.39318	-3.82446	6.21763	-0.0420929
3.28	-0.382863	0.23587	2.29718	-3.88217	6.17935	-0.0615204
3.3	-0.375863	0.228352	2.25518	-3.88659	6.14176	-0.0283479
3.32	-0.362163	0.221109	2.17298	-3.93257	6.10555	-0.0381153
3.34	-0.355163	0.214006	2.13098	-3.93905	6.07003	-0.00908283
3.36	-0.355163	0.206903	2.13098	-3.90354	6.03451	0.0619497
3.38	-0.346063	0.199981	2.07638	-3.92353	5.99991	0.0765622
3.4	-0.318363	0.193614	1.91018	-4.05789	5.96807	-0.0259653
3.42	-0.288463	0.187845	1.73078	-4.20845	5.93922	-0.147673
3.44	-0.288463	0.182076	1.73078	-4.1796	5.91038	-0.0899803
3.46	-0.309163	0.175892	1.85498	-4.02449	5.87946	0.0960522
3.48	-0.318363	0.169525	1.91018	-3.93745	5.84763	0.214925
3.5	-0.304563	0.163434	1.82738	-3.98979	5.81717	0.193037
3.52	-0.276963	0.157895	1.66178	-4.1277	5.78947	0.0828298
3.54	-0.263163	0.152631	1.57898	-4.18418	5.76316	0.0526623
3.56	-0.258563	0.14746	1.55138	-4.18592	5.7373	0.0767748
3.58	-0.256263	0.142335	1.53758	-4.1741	5.71167	0.114227
3.6	-0.251663	0.137302	1.50998	-4.17653	5.68651	0.13696
3.62	-0.253963	0.132222	1.52378	-4.13734	5.66111	0.201552
3.64	-0.260863	0.127005	1.56518	-4.06985	5.63503	0.295125
3.66	-0.258563	0.121834	1.55138	-4.05779	5.60917	0.333037
3.68	-0.249363	0.116847	1.49618	-4.08806	5.58423	0.32771
3.7	-0.237863	0.112089	1.42718	-4.13327	5.56045	0.306282
3.72	-0.244763	0.107194	1.46858	-4.06739	5.53597	0.396635
3.74	-0.249363	0.102207	1.49618	-4.01486	5.51103	0.474107
3.76	-0.247063	0.0972655	1.48238	-4.00395	5.48633	0.50972
3.78	-0.237863	0.0925083	1.42718	-4.03537	5.46254	0.502092
3.8	-0.233263	0.087843	1.39958	-4.03964	5.43922	0.521145
3.82	-0.230963	0.0832238	1.38578	-4.03034	5.41612	0.553537
3.84	-0.230963	0.0786045	1.38578	-4.00725	5.39302	0.59973
3.86	-0.226363	0.0740773	1.35818	-4.01221	5.37039	0.617402
3.88	-0.219463	0.069688	1.31678	-4.03166	5.34844	0.619895
3.9	-0.221763	0.0652528	1.33058	-3.99569	5.32626	0.678047
3.92	-0.230963	0.0606335	1.38578	-3.91739	5.30317	0.77944
3.94	-0.235563	0.0559223	1.41338	-3.86624	5.27961	0.854153
3.96	-0.228663	0.051349	1.37198	-3.88477	5.25675	0.858485
3.98	-0.219463	0.0469598	1.31678	-3.91802	5.2348	0.847178
4	-0.212563	0.0427085	1.27538	-3.93817	5.21354	0.84829
4.02	-0.201063	0.0386873	1.20638	-3.98706	5.19344	0.819503
4.04	-0.182663	0.035034	1.09598	-4.07919	5.17517	0.745635
4.06	-0.161863	0.0317968	0.971175	-4.18781	5.15898	0.653208
4.08	-0.138963	0.0290175	0.833775	-4.31131	5.14509	0.5436
4.1	-0.104363	0.0269303	0.626175	-4.50848	5.13465	0.356873
4.12	-0.0859626	0.025211	0.515775	-4.61028	5.12606	0.263665
4.14	-0.115863	0.0228938	0.695175	-4.41929	5.11447	0.466238
4.16	-0.145863	0.0199765	0.875175	-4.22471	5.09988	0.67541
4.18	-0.161863	0.0167393	0.971175	-4.11252	5.0837	0.803783
4.2	-0.148063	0.013778	0.888375	-4.18051	5.06889	0.750595
4.22	-0.127363	0.0112308	0.764175	-4.29198	5.05615	0.651868
4.24	-0.118163	0.00886752	0.708975	-4.33536	5.04434	0.6203
4.26	-0.106663	0.00673426	0.639975	-4.3937	5.03367	0.572633
4.28	-0.0883626	0.00496701	0.530175	-4.49466	5.02484	0.480505
4.3	-0.0629626	0.00370776	0.377775	-4.64076	5.01854	0.340698
4.32	-0.0468626	0.00277051	0.281175	-4.73268	5.01385	0.25347
4.34	-0.0399626	0.00197126	0.239775	-4.77008	5.00986	0.220063
4.36	-0.0238626	0.00149401	0.143175	-4.86429	5.00747	0.128235
4.38	0	0.00149401	0	-5.00747	5.00747	-0.0149401
4.48	0.125737	0.00400876	-0.754425	-5.77447	5.02004	-0.794512
4.5	0.155637	0.00712151	-0.933825	-5.96943	5.03561	-1.00504
4.52	0.183237	0.0107863	-1.09942	-6.15336	5.05393	-1.20729
4.54	0.197037	0.014727	-1.18222	-6.25586	5.07364	-1.32949
4.56	0.210837	0.0189438	-1.26502	-6.35974	5.09472	-1.45446
4.58	0.229237	0.0235285	-1.37542	-6.49307	5.11764	-1.61071
4.6	0.247637	0.0284813	-1.48582	-6.62823	5.14241	-1.77064
4.62	0.259237	0.033666	-1.55542	-6.72375	5.16833	-1.89208
4.64	0.275337	0.0391727	-1.65202	-6.84789	5.19586	-2.04375
4.66	0.289037	0.0449535	-1.73422	-6.95899	5.22477	-2.18376
4.68	0.302837	0.0510102	-1.81702	-7.07208	5.25505	-2.32713

## Sheet: DATA 4
								Raw =	2	cmH2O·s/l
								EL =	10	cmH2O/l
								ECW =	5	cmH2O/l
								PL(FRC) =	5	cmH2O
t	V'	V	Palv	Ppl	PL	Pmus
s	l/s	l	cmH2O	cmH2O	cmH2O	cmH2O
0	0	0	0	-5	5	0
0.02	0.01	0.0002	-0.02	-5.022	5.002	-0.023
0.04	0.0221374	0.000642749	-0.0442749	-5.0507	5.00643	-0.0539161
0.06	0.0475374	0.0015935	-0.0950749	-5.11101	5.01593	-0.118977
0.08	0.0704374	0.00300225	-0.140875	-5.1709	5.03002	-0.185909
0.1	0.0774374	0.004551	-0.154875	-5.20038	5.04551	-0.22314
0.12	0.0866374	0.00628374	-0.173275	-5.23611	5.06284	-0.267531
0.14	0.102637	0.00833649	-0.205275	-5.28864	5.08336	-0.330322
0.16	0.121037	0.0107572	-0.242075	-5.34965	5.10757	-0.403434
0.18	0.137237	0.013502	-0.274475	-5.40949	5.13502	-0.477005
0.2	0.148737	0.0164767	-0.297475	-5.46224	5.16477	-0.544626
0.22	0.162537	0.0197275	-0.325075	-5.52235	5.19727	-0.620987
0.24	0.190137	0.0235302	-0.380275	-5.61558	5.2353	-0.733228
0.26	0.229237	0.028115	-0.458475	-5.73962	5.28115	-0.8802
0.28	0.268337	0.0334817	-0.536675	-5.87149	5.33482	-1.0389
0.3	0.291337	0.0393085	-0.582675	-5.97576	5.39308	-1.1723
0.32	0.300537	0.0453192	-0.601075	-6.05427	5.45319	-1.28086
0.34	0.307537	0.05147	-0.615075	-6.12977	5.5147	-1.38712
0.36	0.319037	0.0578507	-0.638075	-6.21658	5.57851	-1.50584
0.38	0.316637	0.0641835	-0.633275	-6.27511	5.64183	-1.59603
0.4	0.298337	0.0701502	-0.596675	-6.29818	5.7015	-1.64893
0.42	0.268337	0.075517	-0.536675	-6.29184	5.75517	-1.66943
0.44	0.240737	0.0803317	-0.481475	-6.28479	5.80332	-1.68645
0.46	0.229237	0.0849165	-0.458475	-6.30764	5.84916	-1.73222
0.48	0.231537	0.0895472	-0.463075	-6.35855	5.89547	-1.80628
0.5	0.245337	0.094454	-0.490675	-6.43521	5.94454	-1.90748
0.52	0.263737	0.0997287	-0.527475	-6.52476	5.99729	-2.02341
0.54	0.282237	0.105373	-0.564475	-6.61821	6.05373	-2.14508
0.56	0.300537	0.111384	-0.601075	-6.71492	6.11384	-2.27184
0.58	0.316637	0.117717	-0.633275	-6.81044	6.17717	-2.39903
0.6	0.351137	0.12474	-0.702275	-6.94967	6.2474	-2.57337
0.62	0.383437	0.132408	-0.766875	-7.09096	6.32408	-2.753
0.64	0.399537	0.140399	-0.799075	-7.20307	6.40399	-2.90506
0.66	0.392637	0.148252	-0.785275	-7.26779	6.48252	-3.00905
0.68	0.383437	0.155921	-0.766875	-7.32608	6.55921	-3.10569
0.7	0.388037	0.163681	-0.776075	-7.41289	6.63681	-3.2313
0.72	0.417937	0.17204	-0.835875	-7.55628	6.7204	-3.41648
0.74	0.445537	0.180951	-0.891075	-7.70058	6.80951	-3.60534
0.76	0.459337	0.190138	-0.918675	-7.82005	6.90138	-3.77074
0.78	0.461637	0.19937	-0.923275	-7.91698	6.9937	-3.91383
0.8	0.459337	0.208557	-0.918675	-8.00425	7.08557	-4.04703
0.82	0.450137	0.21756	-0.900275	-8.07587	7.1756	-4.16367
0.84	0.429437	0.226149	-0.858875	-8.12036	7.26149	-4.25111
0.86	0.415637	0.234461	-0.831275	-8.17589	7.34461	-4.3482
0.88	0.413337	0.242728	-0.826675	-8.25396	7.42728	-4.4676
0.9	0.411037	0.250949	-0.822075	-8.33156	7.50949	-4.58631
0.92	0.406437	0.259078	-0.812875	-8.40365	7.59078	-4.69904
0.94	0.401837	0.267114	-0.803675	-8.47482	7.67114	-4.81039
0.96	0.397237	0.275059	-0.794475	-8.54507	7.75059	-4.92036
0.98	0.392637	0.282912	-0.785275	-8.61439	7.82912	-5.02895
1	0.381137	0.290535	-0.762275	-8.66762	7.90535	-5.1203
1.02	0.374237	0.298019	-0.748475	-8.72867	7.98019	-5.21877
1.04	0.376537	0.30555	-0.753075	-8.80858	8.0555	-5.33633
1.06	0.383437	0.313219	-0.766875	-8.89906	8.13219	-5.46516
1.08	0.388037	0.32098	-0.776075	-8.98587	8.2098	-5.59077
1.1	0.383437	0.328648	-0.766875	-9.05336	8.28648	-5.6966
1.12	0.376537	0.336179	-0.753075	-9.11487	8.36179	-5.79576
1.14	0.371937	0.343618	-0.743875	-9.18005	8.43618	-5.89814
1.16	0.371937	0.351057	-0.743875	-9.25444	8.51057	-6.00973
1.18	0.369637	0.358449	-0.739275	-9.32377	8.58449	-6.11602
1.2	0.362737	0.365704	-0.725475	-9.38252	8.65704	-6.21104
1.22	0.353537	0.372775	-0.707075	-9.43482	8.72775	-6.2987
1.24	0.344337	0.379662	-0.688675	-9.48529	8.79662	-6.3836
1.26	0.339637	0.386454	-0.679275	-9.54382	8.86454	-6.47609
1.28	0.339637	0.393247	-0.679275	-9.61175	8.93247	-6.57798
1.3	0.330537	0.399858	-0.661075	-9.65965	8.99858	-6.65894
1.32	0.325837	0.406375	-0.651675	-9.71542	9.06375	-6.7473
1.34	0.330537	0.412985	-0.661075	-9.79093	9.12985	-6.85586
1.36	0.314337	0.419272	-0.628675	-9.8214	9.19272	-6.91776
1.38	0.289037	0.425053	-0.578075	-9.8286	9.25053	-6.95387
1.4	0.270737	0.430468	-0.541475	-9.84615	9.30468	-6.99849
1.42	0.268337	0.435834	-0.536675	-9.89502	9.35834	-7.07419
1.44	0.282237	0.441479	-0.564475	-9.97927	9.41479	-7.18666
1.46	0.293737	0.447354	-0.587475	-10.061	9.47354	-7.29778
1.48	0.302837	0.453411	-0.605675	-10.1398	9.53411	-7.40683
1.5	0.307537	0.459561	-0.615075	-10.2107	9.59561	-7.5085
1.52	0.293737	0.465436	-0.587475	-10.2418	9.65436	-7.56902
1.54	0.266037	0.470757	-0.532075	-10.2396	9.70757	-7.59343
1.56	0.245337	0.475664	-0.490675	-10.2473	9.75664	-7.62563
1.58	0.238437	0.480432	-0.476875	-10.2812	9.80432	-7.68336
1.6	0.229237	0.485017	-0.458475	-10.3086	9.85017	-7.73373
1.62	0.210837	0.489234	-0.421675	-10.314	9.89234	-7.76018
1.64	0.194737	0.493129	-0.389475	-10.3208	9.93129	-7.7864
1.66	0.197037	0.497069	-0.394075	-10.3648	9.97069	-7.85012
1.68	0.210837	0.501286	-0.421675	-10.4345	10.0129	-7.94097
1.7	0.217737	0.505641	-0.435475	-10.4919	10.0564	-8.02009
1.72	0.213137	0.509904	-0.426275	-10.5253	10.099	-8.07483
1.74	0.208537	0.514074	-0.417075	-10.5578	10.1407	-8.12819
1.76	0.206237	0.518199	-0.412475	-10.5945	10.182	-8.18546
1.78	0.210837	0.522416	-0.421675	-10.6458	10.2242	-8.25791
1.8	0.210837	0.526633	-0.421675	-10.688	10.2663	-8.32116
1.82	0.203937	0.530711	-0.407875	-10.715	10.3071	-8.36855
1.84	0.201637	0.534744	-0.403275	-10.7507	10.3474	-8.42444
1.86	0.187837	0.538501	-0.375675	-10.7607	10.385	-8.45319
1.88	0.169437	0.54189	-0.338875	-10.7578	10.4189	-8.46722
1.9	0.153337	0.544956	-0.306675	-10.7562	10.4496	-8.48102
1.92	0.144137	0.547839	-0.288275	-10.7667	10.4784	-8.50586
1.94	0.137237	0.550584	-0.274475	-10.7803	10.5058	-8.53323
1.96	0.144137	0.553467	-0.288275	-10.8229	10.5347	-8.59027
1.98	0.146437	0.556395	-0.292875	-10.8568	10.564	-8.63881
2	0.127937	0.558954	-0.255875	-10.8454	10.5895	-8.64019
2.02	0.102637	0.561007	-0.205275	-10.8153	10.6101	-8.62038
2.04	0.0911374	0.56283	-0.182275	-10.8106	10.6283	-8.62472
2.06	0.0796374	0.564422	-0.159275	-10.8035	10.6442	-8.62561
2.08	0.0704374	0.565831	-0.140875	-10.7992	10.6583	-8.62834
2.1	0.0636374	0.567104	-0.127275	-10.7983	10.671	-8.63383
2.12	0.0636374	0.568377	-0.127275	-10.811	10.6838	-8.65292
2.14	0.0567374	0.569511	-0.113475	-10.8086	10.6951	-8.65615
2.16	0.0383374	0.570278	-0.0766749	-10.7795	10.7028	-8.63085
2.18	0.0175374	0.570629	-0.0350749	-10.7414	10.7063	-8.59451
2.2	0.00603744	0.57075	-0.0120749	-10.7196	10.7075	-8.57332
2.22	0.0152374	0.571054	-0.0304749	-10.741	10.7105	-8.59629
2.24	0.0198374	0.571451	-0.0396749	-10.7542	10.7145	-8.61144
2.26	0.0106374	0.571664	-0.0212749	-10.7379	10.7166	-8.59623
2.28	0.005	0.571764	-0.01	-10.7276	10.7176	-8.58646
2.3	0.002	0.571804	-0.004	-10.722	10.718	-8.58106
2.32	0.002	0.571844	-0.004	-10.7224	10.7184	-8.58166
2.34	0.001	0.571864	-0.002	-10.7206	10.7186	-8.57996
2.36	0.001	0.571884	-0.002	-10.7208	10.7188	-8.58026
2.38	0	0.571884	0	-10.7188	10.7188	-8.57826
2.4	-0.0169626	0.571545	0.0339251	-10.6815	10.7154	-8.53924
2.42	-0.0399626	0.570745	0.0799251	-10.6275	10.7075	-8.48126
2.44	-0.0606626	0.569532	0.121325	-10.574	10.6953	-8.42166
2.46	-0.0813626	0.567905	0.162725	-10.5163	10.679	-8.35585
2.48	-0.102163	0.565862	0.204325	-10.4543	10.6586	-8.2836
2.5	-0.120563	0.56345	0.241125	-10.3934	10.6345	-8.21063
2.52	-0.141263	0.560625	0.282525	-10.3237	10.6063	-8.12685
2.54	-0.164263	0.55734	0.328525	-10.2449	10.5734	-8.03157
2.56	-0.196363	0.553413	0.392725	-10.1414	10.5341	-7.90846
2.58	-0.244763	0.548517	0.489525	-9.99565	10.4852	-7.73824
2.6	-0.304563	0.542426	0.609125	-9.81514	10.4243	-7.52727
2.62	-0.359863	0.535229	0.719725	-9.63256	10.3523	-7.30871
2.64	-0.398863	0.527252	0.797725	-9.47479	10.2725	-7.11105
2.66	-0.426563	0.51872	0.853125	-9.33408	10.1872	-6.92768
2.68	-0.456463	0.509591	0.912925	-9.18299	10.0959	-6.73094
2.7	-0.477163	0.500048	0.954325	-9.04615	10.0005	-6.54639
2.72	-0.488663	0.490275	0.977325	-8.92542	9.90275	-6.37679
2.74	-0.493263	0.480409	0.986525	-8.81757	9.80409	-6.21962
2.76	-0.507063	0.470268	1.01413	-8.68856	9.70268	-6.0399
2.78	-0.525463	0.459759	1.05093	-8.54666	9.59759	-5.84546
2.8	-0.527763	0.449204	1.05553	-8.43651	9.49204	-5.68253
2.82	-0.520863	0.438786	1.04173	-8.34614	9.38786	-5.54007
2.84	-0.511663	0.428553	1.02333	-8.26221	9.28553	-5.40497
2.86	-0.507063	0.418412	1.01413	-8.16999	9.18412	-5.26205
2.88	-0.507063	0.408271	1.01413	-8.06858	9.08271	-5.10993
2.9	-0.509363	0.398083	1.01873	-7.96211	8.98083	-4.95253
2.92	-0.507063	0.387942	1.01413	-7.8653	8.87942	-4.80501
2.94	-0.500163	0.377939	1.00033	-7.77906	8.77939	-4.66876
2.96	-0.486363	0.368212	0.972725	-7.70939	8.68212	-4.55045
2.98	-0.467963	0.358852	0.935925	-7.6526	8.58852	-4.44686
3	-0.451863	0.349815	0.903725	-7.59443	8.49815	-4.3435
3.02	-0.444963	0.340916	0.889925	-7.51923	8.40916	-4.22381
3.04	-0.431163	0.332293	0.862325	-7.4606	8.32293	-4.12206
3.06	-0.419663	0.323899	0.839325	-7.39967	8.23899	-4.01916
3.08	-0.410363	0.315692	0.820725	-7.3362	8.15692	-3.91466
3.1	-0.403463	0.307623	0.806925	-7.2693	8.07623	-3.80742
3.12	-0.401163	0.2996	0.802325	-7.19367	7.996	-3.69167
3.14	-0.401163	0.291576	0.802325	-7.11344	7.91576	-3.57132
3.16	-0.403463	0.283507	0.806925	-7.02815	7.83507	-3.44568
3.18	-0.403463	0.275438	0.806925	-6.94745	7.75438	-3.32464
3.2	-0.403463	0.267369	0.806925	-6.86676	7.67369	-3.2036
3.22	-0.398863	0.259391	0.797725	-6.79619	7.59391	-3.09314
3.24	-0.394363	0.251504	0.788725	-6.72632	7.51504	-2.98384
3.26	-0.398863	0.243527	0.797725	-6.63754	7.43527	-2.85518
3.28	-0.382863	0.23587	0.765725	-6.59297	7.3587	-2.77232
3.3	-0.375863	0.228352	0.751725	-6.5318	7.28352	-2.67356
3.32	-0.362163	0.221109	0.724325	-6.48677	7.21109	-2.59231
3.34	-0.355163	0.214006	0.710325	-6.42973	7.14006	-2.49976
3.36	-0.355163	0.206903	0.710325	-6.3587	7.06903	-2.39321
3.38	-0.346063	0.199981	0.692125	-6.30769	6.99981	-2.30759
3.4	-0.318363	0.193614	0.636725	-6.29942	6.93614	-2.26749
3.42	-0.288463	0.187845	0.576925	-6.30152	6.87845	-2.24075
3.44	-0.288463	0.182076	0.576925	-6.24383	6.82076	-2.15421
3.46	-0.309163	0.175892	0.618325	-6.1406	6.75892	-2.02006
3.48	-0.318363	0.169525	0.636725	-6.05853	6.69525	-1.90615
3.5	-0.304563	0.163434	0.609125	-6.02521	6.63434	-1.84238
3.52	-0.276963	0.157895	0.553925	-6.02502	6.57895	-1.81449
3.54	-0.263163	0.152631	0.526325	-5.99999	6.52631	-1.76314
3.56	-0.258563	0.14746	0.517125	-5.95748	6.4746	-1.69478
3.58	-0.256263	0.142335	0.512525	-5.91082	6.42335	-1.6225
3.6	-0.251663	0.137302	0.503325	-5.86969	6.37302	-1.5562
3.62	-0.253963	0.132222	0.507925	-5.8143	6.32222	-1.47541
3.64	-0.260863	0.127005	0.521725	-5.74833	6.27005	-1.38335
3.66	-0.258563	0.121834	0.517125	-5.70121	6.21834	-1.31038
3.68	-0.249363	0.116847	0.498725	-5.66974	6.16847	-1.25397
3.7	-0.237863	0.112089	0.475725	-5.64517	6.12089	-1.20561
3.72	-0.244763	0.107194	0.489525	-5.58242	6.07194	-1.11839
3.74	-0.249363	0.102207	0.498725	-5.52334	6.02207	-1.03438
3.76	-0.247063	0.0972655	0.494125	-5.47853	5.97266	-0.964858
3.78	-0.237863	0.0925083	0.475725	-5.44936	5.92508	-0.911899
3.8	-0.233263	0.087843	0.466525	-5.41191	5.87843	-0.851121
3.82	-0.230963	0.0832238	0.461925	-5.37031	5.83224	-0.786432
3.84	-0.230963	0.0786045	0.461925	-5.32412	5.78605	-0.717143
3.86	-0.226363	0.0740773	0.452725	-5.28805	5.74077	-0.658434
3.88	-0.219463	0.069688	0.438925	-5.25796	5.69688	-0.606395
3.9	-0.221763	0.0652528	0.443525	-5.209	5.65253	-0.535267
3.92	-0.230963	0.0606335	0.461925	-5.14441	5.60634	-0.447578
3.94	-0.235563	0.0559223	0.471125	-5.0881	5.55922	-0.367709
3.96	-0.228663	0.051349	0.457325	-5.05617	5.51349	-0.31291
3.98	-0.219463	0.0469598	0.438925	-5.03067	5.4696	-0.265472
4	-0.212563	0.0427085	0.425125	-5.00196	5.42709	-0.215503
4.02	-0.201063	0.0386873	0.402125	-4.98475	5.38687	-0.178184
4.04	-0.182663	0.035034	0.365325	-4.98502	5.35034	-0.160185
4.06	-0.161863	0.0317968	0.323725	-4.99424	5.31797	-0.153227
4.08	-0.138963	0.0290175	0.277925	-5.01225	5.29018	-0.157338
4.1	-0.104363	0.0269303	0.208725	-5.06058	5.2693	-0.195229
4.12	-0.0859626	0.025211	0.171925	-5.08019	5.25211	-0.20624
4.14	-0.115863	0.0228938	0.231725	-4.99721	5.22894	-0.111681
4.16	-0.145863	0.0199765	0.291725	-4.90804	5.19977	-0.00792269
4.18	-0.161863	0.0167393	0.323725	-4.84367	5.16739	0.0726361
4.2	-0.148063	0.013778	0.296125	-4.84166	5.13778	0.0894548
4.22	-0.127363	0.0112308	0.254725	-4.85758	5.11231	0.0862636
4.24	-0.118163	0.00886752	0.236325	-4.85235	5.08868	0.103312
4.26	-0.106663	0.00673426	0.213325	-4.85402	5.06734	0.112311
4.28	-0.0883626	0.00496701	0.176725	-4.87295	5.04967	0.10222
4.3	-0.0629626	0.00370776	0.125925	-4.91115	5.03708	0.0703087
4.32	-0.0468626	0.00277051	0.0937251	-4.93398	5.02771	0.0521674
4.34	-0.0399626	0.00197126	0.0799251	-4.93979	5.01971	0.0503562
4.36	-0.0238626	0.00149401	0.0477251	-4.96721	5.01494	0.025315
4.38	0	0.00149401	0	-5.01494	5.01494	-0.0224101
4.48	0.125737	0.00400876	-0.251475	-5.29156	5.04009	-0.311606
4.5	0.155637	0.00712151	-0.311275	-5.38249	5.07122	-0.418097
4.52	0.183237	0.0107863	-0.366475	-5.47434	5.10786	-0.528269
4.54	0.197037	0.014727	-0.394075	-5.54134	5.14727	-0.61498
4.56	0.210837	0.0189438	-0.421675	-5.61111	5.18944	-0.705831
4.58	0.229237	0.0235285	-0.458475	-5.69376	5.23529	-0.811402
4.6	0.247637	0.0284813	-0.495275	-5.78009	5.28481	-0.922494
4.62	0.259237	0.033666	-0.518475	-5.85513	5.33666	-1.02346
4.64	0.275337	0.0391727	-0.550675	-5.9424	5.39173	-1.13827
4.66	0.289037	0.0449535	-0.578075	-6.02761	5.44953	-1.25238
4.68	0.302837	0.0510102	-0.605675	-6.11578	5.5101	-1.37083

## Sheet: DATA 5
								Raw =	6	cmH2O·s/l
								EL =	10	cmH2O/l
								ECW =	5	cmH2O/l
								PL(FRC) =	5	cmH2O
t	V'	V	Palv	Ppl	PL	Pmus
s	l/s	l	cmH2O	cmH2O	cmH2O	cmH2O
0	0	0	0	-5	5	0
0.02	0.01	0.0002	-0.06	-5.062	5.002	-0.063
0.04	0.0221374	0.000642749	-0.132825	-5.13925	5.00643	-0.142466
0.06	0.0475374	0.0015935	-0.285225	-5.30116	5.01593	-0.309127
0.08	0.0704374	0.00300225	-0.422625	-5.45265	5.03002	-0.467658
0.1	0.0774374	0.004551	-0.464625	-5.51013	5.04551	-0.53289
0.12	0.0866374	0.00628374	-0.519825	-5.58266	5.06284	-0.614081
0.14	0.102637	0.00833649	-0.615825	-5.69919	5.08336	-0.740872
0.16	0.121037	0.0107572	-0.726225	-5.8338	5.10757	-0.887583
0.18	0.137237	0.013502	-0.823425	-5.95844	5.13502	-1.02595
0.2	0.148737	0.0164767	-0.892425	-6.05719	5.16477	-1.13958
0.22	0.162537	0.0197275	-0.975225	-6.1725	5.19727	-1.27114
0.24	0.190137	0.0235302	-1.14082	-6.37613	5.2353	-1.49378
0.26	0.229237	0.028115	-1.37542	-6.65657	5.28115	-1.79715
0.28	0.268337	0.0334817	-1.61002	-6.94484	5.33482	-2.11225
0.3	0.291337	0.0393085	-1.74802	-7.14111	5.39308	-2.33765
0.32	0.300537	0.0453192	-1.80322	-7.25642	5.45319	-2.48301
0.34	0.307537	0.05147	-1.84522	-7.35992	5.5147	-2.61727
0.36	0.319037	0.0578507	-1.91422	-7.49273	5.57851	-2.78199
0.38	0.316637	0.0641835	-1.89982	-7.54166	5.64183	-2.86258
0.4	0.298337	0.0701502	-1.79002	-7.49153	5.7015	-2.84228
0.42	0.268337	0.075517	-1.61002	-7.36519	5.75517	-2.74278
0.44	0.240737	0.0803317	-1.44442	-7.24774	5.80332	-2.6494
0.46	0.229237	0.0849165	-1.37542	-7.22459	5.84916	-2.64917
0.48	0.231537	0.0895472	-1.38922	-7.2847	5.89547	-2.73243
0.5	0.245337	0.094454	-1.47202	-7.41656	5.94454	-2.88883
0.52	0.263737	0.0997287	-1.58242	-7.57971	5.99729	-3.07836
0.54	0.282237	0.105373	-1.69342	-7.74716	6.05373	-3.27403
0.56	0.300537	0.111384	-1.80322	-7.91707	6.11384	-3.47399
0.58	0.316637	0.117717	-1.89982	-8.07699	6.17717	-3.66558
0.6	0.351137	0.12474	-2.10682	-8.35422	6.2474	-3.97792
0.62	0.383437	0.132408	-2.30062	-8.62471	6.32408	-4.28675
0.64	0.399537	0.140399	-2.39722	-8.80122	6.40399	-4.50321
0.66	0.392637	0.148252	-2.35582	-8.83834	6.48252	-4.5796
0.68	0.383437	0.155921	-2.30062	-8.85983	6.55921	-4.63944
0.7	0.388037	0.163681	-2.32822	-8.96504	6.63681	-4.78345
0.72	0.417937	0.17204	-2.50762	-9.22803	6.7204	-5.08823
0.74	0.445537	0.180951	-2.67322	-9.48273	6.80951	-5.38749
0.76	0.459337	0.190138	-2.75602	-9.6574	6.90138	-5.60809
0.78	0.461637	0.19937	-2.76982	-9.76353	6.9937	-5.76038
0.8	0.459337	0.208557	-2.75602	-9.8416	7.08557	-5.88438
0.82	0.450137	0.21756	-2.70082	-9.87642	7.1756	-5.96422
0.84	0.429437	0.226149	-2.57662	-9.83811	7.26149	-5.96886
0.86	0.415637	0.234461	-2.49382	-9.83844	7.34461	-6.01075
0.88	0.413337	0.242728	-2.48002	-9.90731	7.42728	-6.12095
0.9	0.411037	0.250949	-2.46622	-9.97571	7.50949	-6.23046
0.92	0.406437	0.259078	-2.43862	-10.0294	7.59078	-6.32479
0.94	0.401837	0.267114	-2.41102	-10.0822	7.67114	-6.41774
0.96	0.397237	0.275059	-2.38342	-10.134	7.75059	-6.50931
0.98	0.392637	0.282912	-2.35582	-10.1849	7.82912	-6.5995
1	0.381137	0.290535	-2.28682	-10.1922	7.90535	-6.64485
1.02	0.374237	0.298019	-2.24542	-10.2256	7.98019	-6.71572
1.04	0.376537	0.30555	-2.25922	-10.3147	8.0555	-6.84248
1.06	0.383437	0.313219	-2.30062	-10.4328	8.13219	-6.99891
1.08	0.388037	0.32098	-2.32822	-10.538	8.2098	-7.14292
1.1	0.383437	0.328648	-2.30062	-10.5871	8.28648	-7.23035
1.12	0.376537	0.336179	-2.25922	-10.621	8.36179	-7.30191
1.14	0.371937	0.343618	-2.23162	-10.6678	8.43618	-7.38589
1.16	0.371937	0.351057	-2.23162	-10.7422	8.51057	-7.49747
1.18	0.369637	0.358449	-2.21782	-10.8023	8.58449	-7.59457
1.2	0.362737	0.365704	-2.17642	-10.8335	8.65704	-7.66199
1.22	0.353537	0.372775	-2.12122	-10.849	8.72775	-7.71285
1.24	0.344337	0.379662	-2.06602	-10.8626	8.79662	-7.76095
1.26	0.339637	0.386454	-2.03782	-10.9024	8.86454	-7.83464
1.28	0.339637	0.393247	-2.03782	-10.9703	8.93247	-7.93653
1.3	0.330537	0.399858	-1.98322	-10.9818	8.99858	-7.98109
1.32	0.325837	0.406375	-1.95502	-11.0188	9.06375	-8.05064
1.34	0.330537	0.412985	-1.98322	-11.1131	9.12985	-8.17801
1.36	0.314337	0.419272	-1.88602	-11.0787	9.19272	-8.17511
1.38	0.289037	0.425053	-1.73422	-10.9848	9.25053	-8.11002
1.4	0.270737	0.430468	-1.62442	-10.9291	9.30468	-8.08144
1.42	0.268337	0.435834	-1.61002	-10.9684	9.35834	-8.14754
1.44	0.282237	0.441479	-1.69342	-11.1082	9.41479	-8.31561
1.46	0.293737	0.447354	-1.76242	-11.236	9.47354	-8.47273
1.48	0.302837	0.453411	-1.81702	-11.3511	9.53411	-8.61818
1.5	0.307537	0.459561	-1.84522	-11.4408	9.59561	-8.73865
1.52	0.293737	0.465436	-1.76242	-11.4168	9.65436	-8.74397
1.54	0.266037	0.470757	-1.59622	-11.3038	9.70757	-8.65758
1.56	0.245337	0.475664	-1.47202	-11.2287	9.75664	-8.60698
1.58	0.238437	0.480432	-1.43062	-11.2349	9.80432	-8.63711
1.6	0.229237	0.485017	-1.37542	-11.2256	9.85017	-8.65068
1.62	0.210837	0.489234	-1.26502	-11.1574	9.89234	-8.60353
1.64	0.194737	0.493129	-1.16842	-11.0997	9.93129	-8.56535
1.66	0.197037	0.497069	-1.18222	-11.1529	9.97069	-8.63827
1.68	0.210837	0.501286	-1.26502	-11.2779	10.0129	-8.78432
1.7	0.217737	0.505641	-1.30642	-11.3628	10.0564	-8.89104
1.72	0.213137	0.509904	-1.27882	-11.3779	10.099	-8.92738
1.74	0.208537	0.514074	-1.25122	-11.392	10.1407	-8.96234
1.76	0.206237	0.518199	-1.23742	-11.4194	10.182	-9.01041
1.78	0.210837	0.522416	-1.26502	-11.4892	10.2242	-9.10126
1.8	0.210837	0.526633	-1.26502	-11.5314	10.2663	-9.16451
1.82	0.203937	0.530711	-1.22362	-11.5307	10.3071	-9.1843
1.84	0.201637	0.534744	-1.20982	-11.5573	10.3474	-9.23099
1.86	0.187837	0.538501	-1.12702	-11.512	10.385	-9.20454
1.88	0.169437	0.54189	-1.01662	-11.4355	10.4189	-9.14497
1.9	0.153337	0.544956	-0.920025	-11.3696	10.4496	-9.09437
1.92	0.144137	0.547839	-0.864825	-11.3432	10.4784	-9.08241
1.94	0.137237	0.550584	-0.823425	-11.3293	10.5058	-9.08218
1.96	0.144137	0.553467	-0.864825	-11.3995	10.5347	-9.16682
1.98	0.146437	0.556395	-0.878625	-11.4426	10.564	-9.22456
2	0.127937	0.558954	-0.767625	-11.3572	10.5895	-9.15194
2.02	0.102637	0.561007	-0.615825	-11.2259	10.6101	-9.03093
2.04	0.0911374	0.56283	-0.546825	-11.1751	10.6283	-8.98927
2.06	0.0796374	0.564422	-0.477825	-11.122	10.6442	-8.94416
2.08	0.0704374	0.565831	-0.422625	-11.0809	10.6583	-8.91009
2.1	0.0636374	0.567104	-0.381825	-11.0529	10.671	-8.88838
2.12	0.0636374	0.568377	-0.381825	-11.0656	10.6838	-8.90747
2.14	0.0567374	0.569511	-0.340425	-11.0355	10.6951	-8.8831
2.16	0.0383374	0.570278	-0.230025	-10.9328	10.7028	-8.7842
2.18	0.0175374	0.570629	-0.105225	-10.8115	10.7063	-8.66466
2.2	0.00603744	0.57075	-0.0362247	-10.7437	10.7075	-8.59747
2.22	0.0152374	0.571054	-0.0914247	-10.802	10.7105	-8.65724
2.24	0.0198374	0.571451	-0.119025	-10.8335	10.7145	-8.69079
2.26	0.0106374	0.571664	-0.0638247	-10.7805	10.7166	-8.63878
2.28	0.005	0.571764	-0.03	-10.7476	10.7176	-8.60646
2.3	0.002	0.571804	-0.012	-10.73	10.718	-8.58906
2.32	0.002	0.571844	-0.012	-10.7304	10.7184	-8.58966
2.34	0.001	0.571864	-0.006	-10.7246	10.7186	-8.58396
2.36	0.001	0.571884	-0.006	-10.7248	10.7188	-8.58426
2.38	0	0.571884	0	-10.7188	10.7188	-8.57826
2.4	-0.0169626	0.571545	0.101775	-10.6137	10.7154	-8.47139
2.42	-0.0399626	0.570745	0.239775	-10.4677	10.7075	-8.32141
2.44	-0.0606626	0.569532	0.363975	-10.3313	10.6953	-8.17901
2.46	-0.0813626	0.567905	0.488175	-10.1909	10.679	-8.0304
2.48	-0.102163	0.565862	0.612975	-10.0456	10.6586	-7.87495
2.5	-0.120563	0.56345	0.723375	-9.91113	10.6345	-7.72838
2.52	-0.141263	0.560625	0.847575	-9.75868	10.6063	-7.5618
2.54	-0.164263	0.55734	0.985575	-9.58782	10.5734	-7.37452
2.56	-0.196363	0.553413	1.17818	-9.35595	10.5341	-7.12301
2.58	-0.244763	0.548517	1.46858	-9.0166	10.4852	-6.75919
2.6	-0.304563	0.542426	1.82738	-8.59689	10.4243	-6.30902
2.62	-0.359863	0.535229	2.15918	-8.19311	10.3523	-5.86926
2.64	-0.398863	0.527252	2.39318	-7.87934	10.2725	-5.5156
2.66	-0.426563	0.51872	2.55938	-7.62783	10.1872	-5.22143
2.68	-0.456463	0.509591	2.73878	-7.35714	10.0959	-4.90509
2.7	-0.477163	0.500048	2.86298	-7.1375	10.0005	-4.63774
2.72	-0.488663	0.490275	2.93198	-6.97077	9.90275	-4.42214
2.74	-0.493263	0.480409	2.95958	-6.84452	9.80409	-4.24656
2.76	-0.507063	0.470268	3.04238	-6.66031	9.70268	-4.01165
2.78	-0.525463	0.459759	3.15278	-6.44481	9.59759	-3.74361
2.8	-0.527763	0.449204	3.16658	-6.32546	9.49204	-3.57148
2.82	-0.520863	0.438786	3.12518	-6.26269	9.38786	-3.45662
2.84	-0.511663	0.428553	3.06998	-6.21556	9.28553	-3.35832
2.86	-0.507063	0.418412	3.04238	-6.14174	9.18412	-3.2338
2.88	-0.507063	0.408271	3.04238	-6.04033	9.08271	-3.08168
2.9	-0.509363	0.398083	3.05618	-5.92466	8.98083	-2.91507
2.92	-0.507063	0.387942	3.04238	-5.83705	8.87942	-2.77676
2.94	-0.500163	0.377939	3.00098	-5.77841	8.77939	-2.66811
2.96	-0.486363	0.368212	2.91818	-5.76394	8.68212	-2.605
2.98	-0.467963	0.358852	2.80778	-5.78075	8.58852	-2.57501
3	-0.451863	0.349815	2.71118	-5.78698	8.49815	-2.53605
3.02	-0.444963	0.340916	2.66978	-5.73938	8.40916	-2.44396
3.04	-0.431163	0.332293	2.58698	-5.73595	8.32293	-2.39741
3.06	-0.419663	0.323899	2.51798	-5.72102	8.23899	-2.34051
3.08	-0.410363	0.315692	2.46218	-5.69475	8.15692	-2.27321
3.1	-0.403463	0.307623	2.42078	-5.65545	8.07623	-2.19357
3.12	-0.401163	0.2996	2.40698	-5.58902	7.996	-2.08702
3.14	-0.401163	0.291576	2.40698	-5.50879	7.91576	-1.96667
3.16	-0.403463	0.283507	2.42078	-5.4143	7.83507	-1.83183
3.18	-0.403463	0.275438	2.42078	-5.3336	7.75438	-1.71079
3.2	-0.403463	0.267369	2.42078	-5.25291	7.67369	-1.58975
3.22	-0.398863	0.259391	2.39318	-5.20074	7.59391	-1.49769
3.24	-0.394363	0.251504	2.36618	-5.14887	7.51504	-1.40639
3.26	-0.398863	0.243527	2.39318	-5.04209	7.43527	-1.25973
3.28	-0.382863	0.23587	2.29718	-5.06152	7.3587	-1.24087
3.3	-0.375863	0.228352	2.25518	-5.02835	7.28352	-1.17011
3.32	-0.362163	0.221109	2.17298	-5.03812	7.21109	-1.14366
3.34	-0.355163	0.214006	2.13098	-5.00908	7.14006	-1.07911
3.36	-0.355163	0.206903	2.13098	-4.93805	7.06903	-0.972563
3.38	-0.346063	0.199981	2.07638	-4.92344	6.99981	-0.923344
3.4	-0.318363	0.193614	1.91018	-5.02597	6.93614	-0.994036
3.42	-0.288463	0.187845	1.73078	-5.14767	6.87845	-1.0869
3.44	-0.288463	0.182076	1.73078	-5.08998	6.82076	-1.00036
3.46	-0.309163	0.175892	1.85498	-4.90395	6.75892	-0.783409
3.48	-0.318363	0.169525	1.91018	-4.78508	6.69525	-0.632701
3.5	-0.304563	0.163434	1.82738	-4.80696	6.63434	-0.624132
3.52	-0.276963	0.157895	1.66178	-4.91717	6.57895	-0.706643
3.54	-0.263163	0.152631	1.57898	-4.94734	6.52631	-0.710494
3.56	-0.258563	0.14746	1.55138	-4.92323	6.4746	-0.660525
3.58	-0.256263	0.142335	1.53758	-4.88577	6.42335	-0.597447
3.6	-0.251663	0.137302	1.50998	-4.86304	6.37302	-0.549548
3.62	-0.253963	0.132222	1.52378	-4.79845	6.32222	-0.459559
3.64	-0.260863	0.127005	1.56518	-4.70488	6.27005	-0.3399
3.66	-0.258563	0.121834	1.55138	-4.66696	6.21834	-0.276132
3.68	-0.249363	0.116847	1.49618	-4.67229	6.16847	-0.256523
3.7	-0.237863	0.112089	1.42718	-4.69372	6.12089	-0.254164
3.72	-0.244763	0.107194	1.46858	-4.60337	6.07194	-0.139335
3.74	-0.249363	0.102207	1.49618	-4.52589	6.02207	-0.0369266
3.76	-0.247063	0.0972655	1.48238	-4.49028	5.97266	0.0233922
3.78	-0.237863	0.0925083	1.42718	-4.49791	5.92508	0.039551
3.8	-0.233263	0.087843	1.39958	-4.47886	5.87843	0.0819297
3.82	-0.230963	0.0832238	1.38578	-4.44646	5.83224	0.137418
3.84	-0.230963	0.0786045	1.38578	-4.40027	5.78605	0.206707
3.86	-0.226363	0.0740773	1.35818	-4.3826	5.74077	0.247016
3.88	-0.219463	0.069688	1.31678	-4.38011	5.69688	0.271455
3.9	-0.221763	0.0652528	1.33058	-4.32195	5.65253	0.351784
3.92	-0.230963	0.0606335	1.38578	-4.22056	5.60634	0.476272
3.94	-0.235563	0.0559223	1.41338	-4.14585	5.55922	0.574541
3.96	-0.228663	0.051349	1.37198	-4.14151	5.51349	0.60174
3.98	-0.219463	0.0469598	1.31678	-4.15282	5.4696	0.612379
4	-0.212563	0.0427085	1.27538	-4.15171	5.42709	0.634747
4.02	-0.201063	0.0386873	1.20638	-4.1805	5.38687	0.626066
4.04	-0.182663	0.035034	1.09598	-4.25436	5.35034	0.570465
4.06	-0.161863	0.0317968	0.971175	-4.34679	5.31797	0.494224
4.08	-0.138963	0.0290175	0.833775	-4.4564	5.29018	0.398512
4.1	-0.104363	0.0269303	0.626175	-4.64313	5.2693	0.222221
4.12	-0.0859626	0.025211	0.515775	-4.73633	5.25211	0.13761
4.14	-0.115863	0.0228938	0.695175	-4.53376	5.22894	0.351769
4.16	-0.145863	0.0199765	0.875175	-4.32459	5.19977	0.575528
4.18	-0.161863	0.0167393	0.971175	-4.19622	5.16739	0.720086
4.2	-0.148063	0.013778	0.888375	-4.2494	5.13778	0.681705
4.22	-0.127363	0.0112308	0.764175	-4.34813	5.11231	0.595714
4.24	-0.118163	0.00886752	0.708975	-4.3797	5.08868	0.575963
4.26	-0.106663	0.00673426	0.639975	-4.42737	5.06734	0.538961
4.28	-0.0883626	0.00496701	0.530175	-4.51949	5.04967	0.45567
4.3	-0.0629626	0.00370776	0.377775	-4.6593	5.03708	0.322159
4.32	-0.0468626	0.00277051	0.281175	-4.74653	5.02771	0.239618
4.34	-0.0399626	0.00197126	0.239775	-4.77994	5.01971	0.210206
4.36	-0.0238626	0.00149401	0.143175	-4.87176	5.01494	0.120765
4.38	0	0.00149401	0	-5.01494	5.01494	-0.0224101
4.48	0.125737	0.00400876	-0.754425	-5.79451	5.04009	-0.814556
4.5	0.155637	0.00712151	-0.933825	-6.00504	5.07122	-1.04065
4.52	0.183237	0.0107863	-1.09942	-6.20729	5.10786	-1.26122
4.54	0.197037	0.014727	-1.18222	-6.32949	5.14727	-1.40313
4.56	0.210837	0.0189438	-1.26502	-6.45446	5.18944	-1.54918
4.58	0.229237	0.0235285	-1.37542	-6.61071	5.23529	-1.72835
4.6	0.247637	0.0284813	-1.48582	-6.77064	5.28481	-1.91304
4.62	0.259237	0.033666	-1.55542	-6.89208	5.33666	-2.06041
4.64	0.275337	0.0391727	-1.65202	-7.04375	5.39173	-2.23962
4.66	0.289037	0.0449535	-1.73422	-7.18376	5.44953	-2.40853
4.68	0.302837	0.0510102	-1.81702	-7.32713	5.5101	-2.58218

## Sheet: DATA 6
								Raw =	4	cmH2O·s/l
								EL =	8	cmH2O/l
								ECW =	5	cmH2O/l
								PL(FRC) =	5	cmH2O
t	V'	V	Palv	Ppl	PL	Pmus
s	l/s	l	cmH2O	cmH2O	cmH2O	cmH2O
0	0	0	0	-5	5	0
0.02	0.01	0.0002	-0.04	-5.0416	5.0016	-0.0426
0.04	0.0221374	0.000642749	-0.0885498	-5.09369	5.00514	-0.0969055
0.06	0.0475374	0.0015935	-0.19015	-5.2029	5.01275	-0.210865
0.08	0.0704374	0.00300225	-0.28175	-5.30577	5.02402	-0.320779
0.1	0.0774374	0.004551	-0.30975	-5.34616	5.03641	-0.368913
0.12	0.0866374	0.00628374	-0.34655	-5.39682	5.05027	-0.428238
0.14	0.102637	0.00833649	-0.41055	-5.47724	5.06669	-0.518924
0.16	0.121037	0.0107572	-0.48415	-5.57021	5.08606	-0.623994
0.18	0.137237	0.013502	-0.54895	-5.65697	5.10802	-0.724476
0.2	0.148737	0.0164767	-0.59495	-5.72676	5.13181	-0.809147
0.22	0.162537	0.0197275	-0.65015	-5.80797	5.15782	-0.906607
0.24	0.190137	0.0235302	-0.76055	-5.94879	5.18824	-1.06644
0.26	0.229237	0.028115	-0.91695	-6.14187	5.22492	-1.28244
0.28	0.268337	0.0334817	-1.07335	-6.3412	5.26785	-1.50861
0.3	0.291337	0.0393085	-1.16535	-6.47982	5.31447	-1.67636
0.32	0.300537	0.0453192	-1.20215	-6.5647	5.36255	-1.7913
0.34	0.307537	0.05147	-1.23015	-6.64191	5.41176	-1.89926
0.36	0.319037	0.0578507	-1.27615	-6.73896	5.46281	-2.02821
0.38	0.316637	0.0641835	-1.26655	-6.78002	5.51347	-2.10094
0.4	0.298337	0.0701502	-1.19335	-6.75455	5.5612	-2.1053
0.42	0.268337	0.075517	-1.07335	-6.67749	5.60414	-2.05507
0.44	0.240737	0.0803317	-0.96295	-6.6056	5.64265	-2.00726
0.46	0.229237	0.0849165	-0.91695	-6.59628	5.67933	-2.02086
0.48	0.231537	0.0895472	-0.92615	-6.64253	5.71638	-2.09026
0.5	0.245337	0.094454	-0.98135	-6.73698	5.75563	-2.20925
0.52	0.263737	0.0997287	-1.05495	-6.85278	5.79783	-2.35142
0.54	0.282237	0.105373	-1.12895	-6.97194	5.84299	-2.4988
0.56	0.300537	0.111384	-1.20215	-7.09322	5.89107	-2.65014
0.58	0.316637	0.117717	-1.26655	-7.20829	5.94174	-2.79687
0.6	0.351137	0.12474	-1.40455	-7.40247	5.99792	-3.02617
0.62	0.383437	0.132408	-1.53375	-7.59302	6.05927	-3.25506
0.64	0.399537	0.140399	-1.59815	-7.72134	6.12319	-3.42334
0.66	0.392637	0.148252	-1.57055	-7.75657	6.18602	-3.49783
0.68	0.383437	0.155921	-1.53375	-7.78112	6.24737	-3.56072
0.7	0.388037	0.163681	-1.55215	-7.8616	6.30945	-3.68001
0.72	0.417937	0.17204	-1.67175	-8.04807	6.37632	-3.90827
0.74	0.445537	0.180951	-1.78215	-8.22976	6.44761	-4.13451
0.76	0.459337	0.190138	-1.83735	-8.35845	6.5211	-4.30914
0.78	0.461637	0.19937	-1.84655	-8.44151	6.59496	-4.43837
0.8	0.459337	0.208557	-1.83735	-8.50581	6.66846	-4.54859
0.82	0.450137	0.21756	-1.80055	-8.54103	6.74048	-4.62883
0.84	0.429437	0.226149	-1.71775	-8.52694	6.80919	-4.65768
0.86	0.415637	0.234461	-1.66255	-8.53824	6.87569	-4.71055
0.88	0.413337	0.242728	-1.65335	-8.59518	6.94183	-4.80882
0.9	0.411037	0.250949	-1.64415	-8.65174	7.00759	-4.90649
0.92	0.406437	0.259078	-1.62575	-8.69837	7.07262	-4.99376
0.94	0.401837	0.267114	-1.60735	-8.74427	7.13692	-5.07984
0.96	0.397237	0.275059	-1.58895	-8.78942	7.20047	-5.16472
0.98	0.392637	0.282912	-1.57055	-8.83385	7.2633	-5.24841
1	0.381137	0.290535	-1.52455	-8.84883	7.32428	-5.3015
1.02	0.374237	0.298019	-1.49695	-8.88111	7.38416	-5.3712
1.04	0.376537	0.30555	-1.50615	-8.95055	7.4444	-5.4783
1.06	0.383437	0.313219	-1.53375	-9.0395	7.50575	-5.6056
1.08	0.388037	0.32098	-1.55215	-9.11999	7.56784	-5.72489
1.1	0.383437	0.328648	-1.53375	-9.16294	7.62919	-5.80618
1.12	0.376537	0.336179	-1.50615	-9.19558	7.68943	-5.87648
1.14	0.371937	0.343618	-1.48775	-9.23669	7.74894	-5.95478
1.16	0.371937	0.351057	-1.48775	-9.2962	7.80845	-6.05149
1.18	0.369637	0.358449	-1.47855	-9.34615	7.8676	-6.13839
1.2	0.362737	0.365704	-1.45095	-9.37658	7.92563	-6.2051
1.22	0.353537	0.372775	-1.41415	-9.39635	7.9822	-6.26022
1.24	0.344337	0.379662	-1.37735	-9.41464	8.03729	-6.31295
1.26	0.339637	0.386454	-1.35855	-9.45019	8.09164	-6.38246
1.28	0.339637	0.393247	-1.35855	-9.50453	8.14598	-6.47076
1.3	0.330537	0.399858	-1.32215	-9.52101	8.19886	-6.5203
1.32	0.325837	0.406375	-1.30335	-9.55435	8.251	-6.58622
1.34	0.330537	0.412985	-1.32215	-9.62603	8.30388	-6.69096
1.36	0.314337	0.419272	-1.25735	-9.61153	8.35418	-6.70789
1.38	0.289037	0.425053	-1.15615	-9.55657	8.40042	-6.68184
1.4	0.270737	0.430468	-1.08295	-9.52669	8.44374	-6.67903
1.42	0.268337	0.435834	-1.07335	-9.56003	8.48668	-6.7392
1.44	0.282237	0.441479	-1.12895	-9.66078	8.53183	-6.86818
1.46	0.293737	0.447354	-1.17495	-9.75378	8.57883	-6.99055
1.48	0.302837	0.453411	-1.21135	-9.83864	8.62729	-7.10569
1.5	0.307537	0.459561	-1.23015	-9.90664	8.67649	-7.20445
1.52	0.293737	0.465436	-1.17495	-9.89844	8.72349	-7.22562
1.54	0.266037	0.470757	-1.06415	-9.83021	8.76606	-7.18399
1.56	0.245337	0.475664	-0.98135	-9.78666	8.80531	-7.16498
1.58	0.238437	0.480432	-0.95375	-9.79721	8.84346	-7.19937
1.6	0.229237	0.485017	-0.91695	-9.79709	8.88014	-7.22217
1.62	0.210837	0.489234	-0.84335	-9.75722	8.91387	-7.20339
1.64	0.194737	0.493129	-0.77895	-9.72398	8.94503	-7.18962
1.66	0.197037	0.497069	-0.78815	-9.76471	8.97656	-7.25005
1.68	0.210837	0.501286	-0.84335	-9.85364	9.01029	-7.36007
1.7	0.217737	0.505641	-0.87095	-9.91608	9.04513	-7.44428
1.72	0.213137	0.509904	-0.85255	-9.93178	9.07923	-7.4813
1.74	0.208537	0.514074	-0.83415	-9.94674	9.1126	-7.51712
1.76	0.206237	0.518199	-0.82495	-9.97054	9.14559	-7.56154
1.78	0.210837	0.522416	-0.84335	-10.0227	9.17933	-7.63476
1.8	0.210837	0.526633	-0.84335	-10.0564	9.21306	-7.68957
1.82	0.203937	0.530711	-0.81575	-10.0614	9.24569	-7.715
1.84	0.201637	0.534744	-0.80655	-10.0845	9.27795	-7.75822
1.86	0.187837	0.538501	-0.75135	-10.0594	9.30801	-7.75186
1.88	0.169437	0.54189	-0.67775	-10.0129	9.33512	-7.72232
1.9	0.153337	0.544956	-0.61335	-9.973	9.35965	-7.69778
1.92	0.144137	0.547839	-0.57655	-9.95926	9.38271	-7.69846
1.94	0.137237	0.550584	-0.54895	-9.95362	9.40467	-7.70654
1.96	0.144137	0.553467	-0.57655	-10.0043	9.42773	-7.77162
1.98	0.146437	0.556395	-0.58575	-10.0369	9.45116	-7.81889
2	0.127937	0.558954	-0.51175	-9.98338	9.47163	-7.77815
2.02	0.102637	0.561007	-0.41055	-9.8986	9.48806	-7.70364
2.04	0.0911374	0.56283	-0.36455	-9.86719	9.50264	-7.68134
2.06	0.0796374	0.564422	-0.31855	-9.83393	9.51538	-7.65604
2.08	0.0704374	0.565831	-0.28175	-9.8084	9.52665	-7.63755
2.1	0.0636374	0.567104	-0.25455	-9.79138	9.53683	-7.6269
2.12	0.0636374	0.568377	-0.25455	-9.80156	9.54701	-7.64345
2.14	0.0567374	0.569511	-0.22695	-9.78304	9.55609	-7.6306
2.16	0.0383374	0.570278	-0.15335	-9.71557	9.56223	-7.56697
2.18	0.0175374	0.570629	-0.0701498	-9.63518	9.56503	-7.48833
2.2	0.00603744	0.57075	-0.0241498	-9.59015	9.566	-7.44389
2.22	0.0152374	0.571054	-0.0609498	-9.62938	9.56843	-7.48466
2.24	0.0198374	0.571451	-0.0793498	-9.65096	9.57161	-7.50821
2.26	0.0106374	0.571664	-0.0425498	-9.61586	9.57331	-7.47418
2.28	0.005	0.571764	-0.02	-9.59411	9.57411	-7.45293
2.3	0.002	0.571804	-0.008	-9.58243	9.57443	-7.44145
2.32	0.002	0.571844	-0.008	-9.58275	9.57475	-7.44197
2.34	0.001	0.571864	-0.004	-9.57891	9.57491	-7.43823
2.36	0.001	0.571884	-0.004	-9.57907	9.57507	-7.43849
2.38	0	0.571884	0	-9.57507	9.57507	-7.43449
2.4	-0.0169626	0.571545	0.0678502	-9.50451	9.57236	-7.36223
2.42	-0.0399626	0.570745	0.15985	-9.40611	9.56596	-7.25984
2.44	-0.0606626	0.569532	0.24265	-9.31361	9.55626	-7.16127
2.46	-0.0813626	0.567905	0.32545	-9.21779	9.54324	-7.05731
2.48	-0.102163	0.565862	0.40865	-9.11824	9.52689	-6.94755
2.5	-0.120563	0.56345	0.48225	-9.02535	9.5076	-6.8426
2.52	-0.141263	0.560625	0.56505	-8.91995	9.485	-6.72308
2.54	-0.164263	0.55734	0.65705	-8.80167	9.45872	-6.58837
2.56	-0.196363	0.553413	0.78545	-8.64185	9.4273	-6.40891
2.58	-0.244763	0.548517	0.97905	-8.40909	9.38814	-6.15168
2.6	-0.304563	0.542426	1.21825	-8.12116	9.33941	-5.83329
2.62	-0.359863	0.535229	1.43945	-7.84238	9.28183	-5.51852
2.64	-0.398863	0.527252	1.59545	-7.62256	9.21801	-5.25882
2.66	-0.426563	0.51872	1.70625	-7.44351	9.14976	-5.03711
2.68	-0.456463	0.509591	1.82585	-7.25088	9.07673	-4.79883
2.7	-0.477163	0.500048	1.90865	-7.09173	9.00038	-4.59197
2.72	-0.488663	0.490275	1.95465	-6.96755	8.9222	-4.41892
2.74	-0.493263	0.480409	1.97305	-6.87022	8.84327	-4.27227
2.76	-0.507063	0.470268	2.02825	-6.73389	8.76214	-4.08524
2.78	-0.525463	0.459759	2.10185	-6.57622	8.67807	-3.87501
2.8	-0.527763	0.449204	2.11105	-6.48258	8.59363	-3.7286
2.82	-0.520863	0.438786	2.08345	-6.42684	8.51029	-3.62077
2.84	-0.511663	0.428553	2.04665	-6.38177	8.42842	-3.52454
2.86	-0.507063	0.418412	2.02825	-6.31904	8.34729	-3.4111
2.88	-0.507063	0.408271	2.02825	-6.23791	8.26616	-3.27927
2.9	-0.509363	0.398083	2.03745	-6.14722	8.18467	-3.13763
2.92	-0.507063	0.387942	2.02825	-6.07529	8.10354	-3.015
2.94	-0.500163	0.377939	2.00065	-6.02286	8.02351	-2.91255
2.96	-0.486363	0.368212	1.94545	-6.00024	7.94569	-2.8413
2.98	-0.467963	0.358852	1.87185	-5.99897	7.87082	-2.79323
3	-0.451863	0.349815	1.80745	-5.99107	7.79852	-2.74015
3.02	-0.444963	0.340916	1.77985	-5.94748	7.72733	-2.65206
3.04	-0.431163	0.332293	1.72465	-5.93369	7.65834	-2.59515
3.06	-0.419663	0.323899	1.67865	-5.91254	7.59119	-2.53204
3.08	-0.410363	0.315692	1.64145	-5.88409	7.52554	-2.46255
3.1	-0.403463	0.307623	1.61385	-5.84713	7.46098	-2.38525
3.12	-0.401163	0.2996	1.60465	-5.79215	7.3968	-2.29014
3.14	-0.401163	0.291576	1.60465	-5.72796	7.33261	-2.18584
3.16	-0.403463	0.283507	1.61385	-5.65421	7.26806	-2.07174
3.18	-0.403463	0.275438	1.61385	-5.58965	7.2035	-1.96684
3.2	-0.403463	0.267369	1.61385	-5.5251	7.13895	-1.86194
3.22	-0.398863	0.259391	1.59545	-5.47968	7.07513	-1.77664
3.24	-0.394363	0.251504	1.57745	-5.43458	7.01203	-1.6921
3.26	-0.398863	0.243527	1.59545	-5.35276	6.94821	-1.5704
3.28	-0.382863	0.23587	1.53145	-5.35551	6.88696	-1.53485
3.3	-0.375863	0.228352	1.50345	-5.32337	6.82682	-1.46513
3.32	-0.362163	0.221109	1.44865	-5.32022	6.76887	-1.42577
3.34	-0.355163	0.214006	1.42065	-5.2914	6.71205	-1.36143
3.36	-0.355163	0.206903	1.42065	-5.23457	6.65522	-1.26908
3.38	-0.346063	0.199981	1.38425	-5.2156	6.59985	-1.21551
3.4	-0.318363	0.193614	1.27345	-5.27546	6.54891	-1.24353
3.42	-0.288463	0.187845	1.15385	-5.34891	6.50276	-1.28813
3.44	-0.288463	0.182076	1.15385	-5.30275	6.4566	-1.21313
3.46	-0.309163	0.175892	1.23665	-5.17049	6.40714	-1.04995
3.48	-0.318363	0.169525	1.27345	-5.08275	6.3562	-0.930376
3.5	-0.304563	0.163434	1.21825	-5.08922	6.30747	-0.906389
3.52	-0.276963	0.157895	1.10785	-5.15531	6.26316	-0.944779
3.54	-0.263163	0.152631	1.05265	-5.1684	6.22105	-0.931557
3.56	-0.258563	0.14746	1.03425	-5.14543	6.17968	-0.88273
3.58	-0.256263	0.142335	1.02505	-5.11363	6.13868	-0.825302
3.6	-0.251663	0.137302	1.00665	-5.09176	6.09841	-0.77827
3.62	-0.253963	0.132222	1.01585	-5.04193	6.05778	-0.70304
3.64	-0.260863	0.127005	1.04345	-4.97259	6.01604	-0.607615
3.66	-0.258563	0.121834	1.03425	-4.94042	5.97467	-0.549589
3.68	-0.249363	0.116847	0.99745	-4.93732	5.93477	-0.521555
3.7	-0.237863	0.112089	0.95145	-4.94526	5.89671	-0.505711
3.72	-0.244763	0.107194	0.97905	-4.8785	5.85755	-0.414472
3.74	-0.249363	0.102207	0.99745	-4.8202	5.81765	-0.331238
3.76	-0.247063	0.0972655	0.98825	-4.78987	5.77812	-0.276202
3.78	-0.237863	0.0925083	0.95145	-4.78862	5.74007	-0.251158
3.8	-0.233263	0.087843	0.93305	-4.76969	5.70274	-0.208909
3.82	-0.230963	0.0832238	0.92385	-4.74194	5.66579	-0.158059
3.84	-0.230963	0.0786045	0.92385	-4.70499	5.62884	-0.0980088
3.86	-0.226363	0.0740773	0.90545	-4.68717	5.59262	-0.0575545
3.88	-0.219463	0.069688	0.87785	-4.67965	5.5575	-0.0280942
3.9	-0.221763	0.0652528	0.88705	-4.63497	5.52202	0.038764
3.92	-0.230963	0.0606335	0.92385	-4.56122	5.48507	0.135614
3.94	-0.235563	0.0559223	0.94225	-4.50513	5.44738	0.215261
3.96	-0.228663	0.051349	0.91465	-4.49614	5.41079	0.247113
3.98	-0.219463	0.0469598	0.87785	-4.49783	5.37568	0.267373
4	-0.212563	0.0427085	0.85025	-4.49142	5.34167	0.295039
4.02	-0.201063	0.0386873	0.80425	-4.50525	5.3095	0.301316
4.04	-0.182663	0.035034	0.73065	-4.54962	5.28027	0.275208
4.06	-0.161863	0.0317968	0.64745	-4.60692	5.25437	0.234092
4.08	-0.138963	0.0290175	0.55585	-4.67629	5.23214	0.178622
4.1	-0.104363	0.0269303	0.41745	-4.79799	5.21544	0.0673567
4.12	-0.0859626	0.025211	0.34385	-4.85784	5.20169	0.0161069
4.14	-0.115863	0.0228938	0.46345	-4.7197	5.18315	0.165831
4.16	-0.145863	0.0199765	0.58345	-4.57636	5.15981	0.323755
4.18	-0.161863	0.0167393	0.64745	-4.48646	5.13391	0.42984
4.2	-0.148063	0.013778	0.59225	-4.51797	5.11022	0.413136
4.22	-0.127363	0.0112308	0.50945	-4.5804	5.08985	0.36345
4.24	-0.118163	0.00886752	0.47265	-4.59829	5.07094	0.357373
4.26	-0.106663	0.00673426	0.42665	-4.62722	5.05387	0.339105
4.28	-0.0883626	0.00496701	0.35345	-4.68629	5.03974	0.288879
4.3	-0.0629626	0.00370776	0.25185	-4.77781	5.02966	0.203649
4.32	-0.0468626	0.00277051	0.18745	-4.83471	5.02216	0.151434
4.34	-0.0399626	0.00197126	0.15985	-4.85592	5.01577	0.134224
4.36	-0.0238626	0.00149401	0.0954502	-4.9165	5.01195	0.0760281
4.38	0	0.00149401	0	-5.01195	5.01195	-0.0194221
4.48	0.125737	0.00400876	-0.50295	-5.53502	5.03207	-0.555064
4.5	0.155637	0.00712151	-0.62255	-5.67952	5.05697	-0.715129
4.52	0.183237	0.0107863	-0.73295	-5.81924	5.08629	-0.873171
4.54	0.197037	0.014727	-0.78815	-5.90597	5.11782	-0.979601
4.56	0.210837	0.0189438	-0.84335	-5.9949	5.15155	-1.08962
4.58	0.229237	0.0235285	-0.91695	-6.10518	5.18823	-1.22282
4.6	0.247637	0.0284813	-0.99055	-6.2184	5.22785	-1.36081
4.62	0.259237	0.033666	-1.03695	-6.30628	5.26933	-1.47461
4.64	0.275337	0.0391727	-1.10135	-6.41473	5.31338	-1.6106
4.66	0.289037	0.0449535	-1.15615	-6.51578	5.35963	-1.74055
4.68	0.302837	0.0510102	-1.21135	-6.61943	5.40808	-1.87448
